# Supplementary material for: Correlating STED and synchrotron XRF nano-imaging unveils cosegregation of metals and cytoskeleton proteins in dendrites
Source: eLife journal article supplement (doi:10.7554/elife.62334), 2020-12-08
Supplement: supp [file elife-62334-supp-v1.zip]

Archive with 18 entries (18 files):
- elife_poa_e62334_Transparent_Reporting_File.pdf
- elife_poa_e62334_Figure_1_figure_supplement_1.jpg
- elife_poa_e62334_Figure_2_figure_supplement_1.jpg
- elife_poa_e62334_Figure_3_figure_supplement_1.jpg
- elife_poa_e62334_Figure_4_figure_supplement_1.jpg
- elife_poa_e62334_Figure_5_figure_supplement_1.jpg
- elife_poa_e62334_Figure_6_figure_supplement_1.jpg
- elife_poa_e62334_Supplementary_file_1.docx
- elife_poa_e62334_Supplementary_file_2.docx
- elife_poa_e62334_Figure_2_source_data_3.zip
- elife_poa_e62334_Figure_2_source_data_4.zip
- elife_poa_e62334_Figure_4_source_data_2.zip
- elife_poa_e62334_Figure_6_source_data_1.xlsx
- elife_poa_e62334_Figure_6_source_data_2.xlsx
- elife_poa_e62334_Figure_6_source_data_3.xlsx
- elife_poa_e62334_Figure_6_source_data_4.xlsx
- elife_poa_e62334_Table_1_source_data_1.xlsx
- elife_poa_e62334_Source_data_1.xlsx
