# Supplementary material for: Correlating STED and synchrotron XRF nano-imaging unveils cosegregation of metals and cytoskeleton proteins in dendrites
Source: eLife journal article supplement (doi:10.7554/elife.62334), 2020-12-08
Supplement: supp [file elife-62334-supp-v1.zip › elife_poa_e62334_Figure_6_source_data_1.xlsx]

## Sheet: 20171208
Ctl	TPEN	TPEN_Zn		Values normalized by Ctl median =>				1516.7		Ctrl	TPEN	TPEN_Zn
1378.5	832.04	1912								0.908881	0.548586	1.26063
1218.9	810.67	1564.5								0.803653	0.534496	1.03152
1356.3	874.5	1782.8								0.894244	0.576581	1.17545
1858.2	825.71	1847.4								1.22516	0.544412	1.21804
1551.7	783.59	1749.4								1.02308	0.516641	1.15343
1692.5	841.83	1722.5								1.11591	0.555041	1.13569
1515.6	887.89	1908.3								0.999275	0.585409	1.25819
1665.3	988.99	1731.2								1.09798	0.652067	1.14143
2013.1	1212.7	1518.4								1.32729	0.799565	1.00112
1355.7	1036.5	1688.2								0.893848	0.683392	1.11307
1300	799.14	1345.6								0.857124	0.526894	0.887189
1326.1	760.49	1555.7								0.874332	0.501411	1.02571
925.33	1145.9	2536.9								0.610094	0.755522	1.67264
752.4	870.68	1403.2								0.496077	0.574062	0.925166
1167.3	982.9	1312.8								0.769631	0.648052	0.865563
1538.7	1100.3	1641.7								1.01451	0.725457	1.08242
1337.6	1084.8	1585.1								0.881915	0.715237	1.0451
1305	1241.5	1248.8								0.860421	0.818553	0.823367
2079	948.13	1112.2								1.37074	0.625127	0.733303
1803.5	900.18	1100.5								1.18909	0.593512	0.725588
2009.7	900.58	1464.8								1.32505	0.593776	0.965781
2460.7	1009.2	1599.3								1.6224	0.665392	1.05446
1733.2	1044.6	1306.3								1.14274	0.688732	0.861278
2243.2	1347	3010.5								1.479	0.888112	1.9849
1517.8	1090.6	2626.8								1.00073	0.719061	1.73192
1683.6	957.22	1825								1.11004	0.63112	1.20327
1472.7	841.27	1631.9								0.97099	0.554671	1.07595
1403.9	926.03	2281								0.925628	0.610556	1.50392
1235.9	1028.4	2277.6								0.814861	0.678051	1.50168
1996.6	1360.1	1893.5								1.31641	0.89675	1.24843
1445.8	1195.8	2236.4								0.953254	0.788422	1.47452
1483.7	798.01	1428.6								0.978242	0.526149	0.941913
1717.5	895.34	1803.2								1.13239	0.590321	1.1889
1905.6	1025.3	1341.3								1.25641	0.676007	0.884354
1936.7	1098.9	1436.6								1.27692	0.724534	0.947188
1354.9	808.2	1808								0.893321	0.532867	1.19206
1544.1	948.19	1913.4								1.01807	0.625166	1.26155
1422.1	1144.3	1543								0.937628	0.754467	1.01734
1719.4	1250.4	1911.4								1.13365	0.824421	1.26024
1349.8	1119.5	1789.1								0.889958	0.738116	1.1796
1413.6	985.89	2018.6								0.932023	0.650023	1.33092
2164.2	2513.9	1725.3								1.42691	1.65748	1.13754
1628.9	901.59	1626.2								1.07398	0.594442	1.0722
1646.4	1108.2	1743.5								1.08551	0.730665	1.14954
1662.8	1219.2	1577.6								1.09633	0.80385	1.04015
1808.8	1236.1	1990.5								1.19259	0.814993	1.31239
1695.6	910.67	1814.7								1.11795	0.600429	1.19648
2756.8	921.87	2220.3								1.81763	0.607813	1.4639
1396.2	756.23	1575								0.920551	0.498602	1.03844
1508	973.06	1688.9								0.994264	0.641564	1.11354
1286.8	885.19	1640.1								0.848421	0.583629	1.08136
1473	849.25	1578.7								0.971187	0.559933	1.04088
1376.1	875.31	1630.5								0.907299	0.577115	1.07503
1458.5	885.97	1570.8								0.961627	0.584143	1.03567
1168.1	773.88	1931.6								0.770159	0.510239	1.27355
1240.6	820.72	2181.4								0.81796	0.541122	1.43825
1528.1	778.95	2129.5								1.00752	0.513582	1.40404
1752.6	856.72	1622.3								1.15554	0.564858	1.06962
1484.5	938.11	1778.3								0.97877	0.61852	1.17248
1630.9		1515.7								1.0753		0.999341
1416		1565.5								0.933606		1.03218
2288.1		1458.2								1.5086		0.961429
1494.5		1651.7								0.985363		1.08901
1542.2		1485.5								1.01681		0.979429
		1432.9										0.944748
		1503.3										0.991165
		1721.7										1.13516
