# Supplementary material for: Correlating STED and synchrotron XRF nano-imaging unveils cosegregation of metals and cytoskeleton proteins in dendrites
Source: eLife journal article supplement (doi:10.7554/elife.62334), 2020-12-08
Supplement: supp [file elife-62334-supp-v1.zip › elife_poa_e62334_Figure_6_source_data_2.xlsx]

## Sheet: 20171208
Ctrl	TPEN	TPEN+Zn		Values normalized by Ctl median =>				1259.7		Ctrl-norm	TPEN-norm	TPEN+Zn-norm
1337.7	819.75	1467.2								1.06192	0.65075	1.16472
1139.8	711.78	1125.4								0.904819	0.565039	0.893387
1236.6	799.99	1559.9								0.981662	0.635064	1.23831
1593.3	822.68	1455.1								1.26482	0.653076	1.15512
1537.3	771.96	1419.2								1.22037	0.612813	1.12662
1653	829.77	1454.6								1.31222	0.658704	1.15472
1291.5	852.16	1426.6								1.02524	0.676479	1.13249
1541.3	1142.2	1358.2								1.22355	0.906724	1.07819
1991.8	1533.2	1089.2								1.58117	1.21712	0.86465
1213.7	1226.7	1600.2								0.963483	0.973803	1.2703
1275.4	882.22	1216.8								1.01246	0.700341	0.965944
1159.7	687.66	1069								0.920616	0.545892	0.848615
805.48	1255.9	1429.5								0.639422	0.996983	1.13479
844.42	789.18	2001.8								0.670334	0.626482	1.58911
1341.9	909.55	1174.8								1.06525	0.722037	0.932603
1270.9	1099.3	1183.4								1.00889	0.872668	0.93943
1076.2	1007.5	1642.4								0.85433	0.799794	1.3038
1111.4	1067.6	1504.1								0.882274	0.847503	1.19401
1439.5	1182.8	1157.5								1.14273	0.938954	0.91887
1688.6	1012.5	1104.1								1.34048	0.803763	0.876479
2018	732.16	1001.5								1.60197	0.581218	0.795031
2454.4	771.45	1568.2								1.9484	0.612408	1.2449
1572.9	967.43	1513.1								1.24863	0.767984	1.20116
2004	1128.4	1130.3								1.59085	0.895769	0.897277
1529.9	1551.6	2502.5								1.2145	1.23172	1.98658
1709.1	991.76	2421.7								1.35675	0.787299	1.92244
1149.6	821.45	1291.9								0.912598	0.6521	1.02556
1141.5	821.45	1414.1								0.906168	0.6521	1.12257
957.42	1026.4	1961.4								0.760038	0.814797	1.55704
1476.3	956.23	2322.9								1.17195	0.759093	1.84401
983.49	1058.1	1733.4								0.780734	0.839962	1.37604
1242.5	2010	1893.1								0.986346	1.59562	1.50282
1445.9	1549.3	1089.4								1.14781	1.2299	0.864809
1692.7	1002.9	1315								1.34373	0.796142	1.0439
1020.8	978.75	975.69								0.810352	0.776971	0.774542
1276.6	1237.6	975.28								1.01342	0.982456	0.774216
1357.6	1157.2	1278.3								1.07772	0.918631	1.01477
1670	909.81	1480.3								1.32571	0.722243	1.17512
1311	1061.8	1280.3								1.04072	0.842899	1.01635
1212.5	1515.4	1407.4								0.962531	1.20298	1.11725
1642.9	1840.6	1178.7								1.3042	1.46114	0.935699
1221.2	1521.9	1521.2								0.969437	1.20814	1.20759
1248.5	1396.3	1386.4								0.991109	1.10844	1.10058
1291.6	2625.9	1258.3								1.02532	2.08454	0.998889
1510.4	1045.5	1557.2								1.19902	0.82996	1.23617
1487.7	1361.5	1399.1								1.181	1.08081	1.11066
2373.1	1388.4	1676.2								1.88386	1.10217	1.33063
1037.5	1276.2	1487.7								0.823609	1.0131	1.181
984.81	907.59	1279.7								0.781781	0.720481	1.01588
734.89	1177.6	1082								0.583385	0.934826	0.858935
988.37	1181.3	1366.4								0.784607	0.937763	1.0847
1019.1	914.97	1182								0.809002	0.72634	0.938319
1178.3	1173.3	1184								0.935381	0.931412	0.939906
881.67	1046.8	1164.6								0.699905	0.830992	0.924506
787.28	859.94	1135.8								0.624974	0.682655	0.901643
885.91	1113.7	1198.3								0.703271	0.884099	0.951258
1571.6	933.29	1307								1.2476	0.740883	1.03755
980.45	806.92	1001.9								0.77832	0.640565	0.795348
971.18	820.77	1084.2								0.770961	0.65156	0.860681
785.48	835.02	1326.5								0.623545	0.662872	1.05303
990.26	871.18	1062.2								0.786108	0.691577	0.843217
1020.8	1018.4	1226.6								0.810352	0.808446	0.973724
		1086.3										0.862348
		1019.5										0.80932
		1100										0.873224
		974.47										0.773573
		1025.3										0.813924
		1472.5										1.16893
