# Supplementary material for: Correlating STED and synchrotron XRF nano-imaging unveils cosegregation of metals and cytoskeleton proteins in dendrites
Source: eLife journal article supplement (doi:10.7554/elife.62334), 2020-12-08
Supplement: supp [file elife-62334-supp-v1.zip › elife_poa_e62334_Figure_6_source_data_3.xlsx]

## Sheet: 20171124
Ctl	TPEN			Values normalized by Ctl median =>				1037.9		Ctrl	TPEN
920.8	1559.4									0.887176	1.50246
826.39	651.82									0.796214	0.628018
854.83	1283.9									0.823615	1.23702
1045.3	747.13									1.00713	0.719848
752	1466									0.72454	1.41247
1123	1099.7									1.08199	1.05954
1100.7	920.43									1.06051	0.88682
891.7	750.87									0.859139	0.723451
1095.3	749.93									1.0553	0.722546
864.91	897.33									0.833327	0.864563
898.45	823.81									0.865642	0.793728
1024.4	747.13									0.986993	0.719848
1170.2	605.88									1.12747	0.583756
995.37	582.94									0.959023	0.561653
977.02	1209									0.941343	1.16485
1202.2	1116.5									1.1583	1.07573
1283	762.75									1.23615	0.734897
738.32	844.2									0.711359	0.813373
1109.7	1037.2									1.06918	0.999326
1030.5	840.99									0.99287	0.81028
905.78	843.02									0.872704	0.812236
1279.4	1172.3									1.23268	1.12949
882.35	1173									0.85013	1.13017
1371.2	1096.5									1.32113	1.05646
1230.5	1036.5									1.18557	0.998651
2712.6	1013									2.61355	0.976009
2269.7	827.27									2.18682	0.797061
1166	740.68									1.12342	0.713633
960.35	877.63									0.925282	0.845582
1272.6	1249.5									1.22613	1.20387
1111.4	848.81									1.07082	0.817815
1182.5	1073.4									1.13932	1.0342
812.95	814.45									0.783264	0.78471
1011.7	1025.7									0.974757	0.988245
	915.16										0.881742

## Sheet: 20171215
	Ctl	TPEN	TPEN_Zn		Values normalized by Ctl median =>				1409.8		Ctrl	TPEN	TPEN_Zn
	1413.1	906.81	1117.4								1.00234	0.643219	0.792595
	1410.2	1078.8	1166.4								1.00028	0.765215	0.827351
	1607.4	1126	1059.8								1.14016	0.798695	0.751738
	1608.1	878.39	886.62								1.14066	0.62306	0.628898
	1413	1060.9	1042.8								1.00227	0.752518	0.739679
	1636.9	876.39	1045.5								1.16109	0.621641	0.741595
	1899.5	937.86	761.32								1.34735	0.665243	0.54002
	1419.4	995.53	1322								1.00681	0.70615	0.937722
	1804.8	862.76	1133.8								1.28018	0.611973	0.804228
	1681.9	808.64	976.91								1.19301	0.573585	0.692942
	1335.1	814.06	1281								0.947014	0.577429	0.90864
	1700	751.56	1054.1								1.20584	0.533097	0.747695
	1555.4	877.2	1174.9								1.10328	0.622216	0.833381
	1406.1	968.12	993.39								0.997376	0.686707	0.704632
	2023.2	745.93	1257.2								1.4351	0.529103	0.891758
	1775.5	769.88	1140.4								1.2594	0.546092	0.808909
	1747.5	760.59	1131.1								1.23954	0.539502	0.802312
	1219.3	774.17	1313								0.864874	0.549135	0.931338
	1843.6	984.52	1067.7								1.3077	0.69834	0.757341
	1645.2	747.34	1233								1.16697	0.530104	0.874592
	1173.9	740.24	1217.9								0.832671	0.525067	0.863881
	970.31	1007.8	1242.8								0.688261	0.714853	0.881543
	1502.4	820.32	1180.8								1.06568	0.58187	0.837566
	1157.4	991.99	1116.5								0.820968	0.703639	0.791956
	1388.9	1079	1318.9								0.985175	0.765357	0.935523
	1261.2	1094.6	1008.5								0.894595	0.776422	0.71535
	1339.6	948.09	1096.6								0.950206	0.6725	0.777841
	988.92	936.97	1351.4								0.701461	0.664612	0.958576
	1108.9	1136.5	1363.7								0.786565	0.806143	0.9673
	1230	1640.7	1105.3								0.872464	1.16378	0.784012
	1257.7	922.66	1394.6								0.892112	0.654462	0.989218
	1409.8	1246.8	1265.3								1	0.884381	0.897503
	1491.1	949.73	1147.5								1.05767	0.673663	0.813945
	1023.2	1617	1157.8								0.725777	1.14697	0.821251
	1295.4	956.51	1034								0.918854	0.678472	0.733437
	1040.4	1121.9	1449.1								0.737977	0.795787	1.02788
	1174.7	1073.6	1359.4								0.833239	0.761526	0.96425
	1076.3	1200.7	1030.5								0.763442	0.851681	0.730955
	1198.4	1079.3	1051								0.85005	0.76557	0.745496
	1652.8	1398.1	1743.1								1.17236	0.991701	1.23642
	1124.7	1246.8	1240.1								0.797773	0.884381	0.879628
		1325	1553.3									0.93985	1.10179
		937.46										0.66496
		942.35										0.668428
