# Supplementary material for: Correlating STED and synchrotron XRF nano-imaging unveils cosegregation of metals and cytoskeleton proteins in dendrites
Source: eLife journal article supplement (doi:10.7554/elife.62334), 2020-12-08
Supplement: supp [file elife-62334-supp-v1.zip › elife_poa_e62334_Figure_6_source_data_4.xlsx]

## Sheet: 20171109
	Ctrl	TPEN	TPEN+Zn		Values normalized by Ctl median =>			930.47		Ctrl-norm	TPEN-norm	TPEN+Zn-norm
	844.12	618.5	776.75							0.907197	0.664718	0.834793
	719.73	711.56	648.64							0.773512	0.764732	0.69711
	896.34	640.24	888.35							0.96332	0.688082	0.954733
	683.19	691.4	754.32							0.734242	0.743065	0.810687
	673.67	753.15	867.55							0.72401	0.80943	0.932378
	777.33	714.53	762.36							0.835417	0.767924	0.819328
	689.95	1170.9	785							0.741507	1.2584	0.84366
	612.45	590.25	706.65							0.658216	0.634357	0.759455
	704.29	1030.9	865.84							0.756919	1.10793	0.93054
	908.86	756.71	647.07							0.976775	0.813256	0.695423
	705.15	841.81	663.28							0.757843	0.904715	0.712844
	861.17	558.29	729.37							0.925522	0.600009	0.783873
	622.84	491.05	725.62							0.669382	0.527744	0.779842
	737.78	872.62	707.87							0.792911	0.937827	0.760766
	814.44	693.96	780.22							0.8753	0.745817	0.838522
	891.97	681.73	965.04							0.958623	0.732673	1.03715
	660.79	1265.7	779.39							0.710168	1.36028	0.83763
	737.03	475.09	681.71							0.792105	0.510591	0.732651
	627.49	628.58	683.98							0.67438	0.675551	0.735091
	651.09	602.77	997.37							0.699743	0.647812	1.0719
	853.94	609.82	618.3							0.917751	0.655389	0.664503
	742.8	873.73	642.05							0.798306	0.93902	0.690028
	704.98	559.41	997.8							0.75766	0.601212	1.07236
	747.98	619.5	834.83							0.803873	0.665793	0.897213
	791.19	686.11	979.13							0.850312	0.73738	1.0523
	917.94	618.34	1180.8							0.986534	0.664546	1.26904
	697.82	748.54	775.92							0.749965	0.804475	0.833901
	887.23	625.54	644.73							0.953529	0.672284	0.692908
	905.86	788.68	778.99							0.973551	0.847615	0.837201
	730.78	761.63	1033.6							0.785388	0.818543	1.11084
	1336.6	674.01	812.97							1.43648	0.724376	0.87372
	1224	752.45	642.32							1.31546	0.808677	0.690318
	1563.7	824.22	582.59							1.68055	0.88581	0.626124
	1328.3	712.6	622.43							1.42756	0.76585	0.668942
	1587	806.99	826.68							1.70559	0.867293	0.888454
	1963.9	763.32	748.86							2.11065	0.82036	0.804819
	1619.6	737.2	946.85							1.74063	0.792288	1.0176
	1427.8	728.25	713.52							1.53449	0.782669	0.766838
	1656.4	767.42	765.31							1.78018	0.824766	0.822498
	754.74	572.64	933.02							0.811138	0.615431	1.00274
	1379.8	684.18	657.77							1.48291	0.735306	0.706922
	1272.9	656.3	773.78							1.36802	0.705342	0.831601
	836.47	749.32	697.93							0.898976	0.805313	0.750083
	853.19	744.73	970.54							0.916945	0.80038	1.04306
	1078.1	804.09	604.89							1.15866	0.864176	0.650091
	782.45	832.15	986.46							0.840919	0.894333	1.06017
	928.47	837.01	613.01							0.997851	0.899556	0.658818
	1327.3	741.47	926.7							1.42648	0.796877	0.995948
	1604.8	659.29	854.96							1.72472	0.708556	0.918847
	1628.3	849.22	1167.7							1.74998	0.912679	1.25496
	1181	816.82	1027.1							1.26925	0.877857	1.10385
	1095.3	790.89	1224.9							1.17715	0.84999	1.31643
	1844.6	819.56	923.52							1.98244	0.880802	0.992531
	2183.9	768.68	785.22							2.34709	0.82612	0.843896
	1642.9	861.64	769.06							1.76567	0.926027	0.826529
	1576.7	758.41	769.06							1.69452	0.815083	0.826529
	1600.2	760.04	514.19							1.71978	0.816835	0.552613
	1225.3	823.17	852.19							1.31686	0.884682	0.91587
	1505.3	786.5	897.21							1.61778	0.845272	0.964255
	1319.2	667.18	895.97							1.41778	0.717035	0.962922
	1425.7	826.53	1270.6							1.53224	0.888293	1.36555
	1317	651.7	872.67							1.41541	0.700399	0.937881
	1159.6	651.9	819.13							1.24625	0.700614	0.88034
	1714.8	622.39	1397.8							1.84294	0.668899	1.50225
	1484.4	1006.2	1241.2							1.59532	1.08139	1.33395
	1260.4	1138.6	1065.5							1.35458	1.22368	1.14512
	930.47	1032.2	1626.3							1	1.10933	1.74783
	878.74	869.96	1270.4							0.944404	0.934968	1.36533
	916.38	798.52	1206.5							0.984857	0.85819	1.29666
	1421.1	860.36	713.97							1.52729	0.924651	0.767322
	1029.1	795.84	782.22							1.106	0.85531	0.840672
	1522.7	832.11	1374.9							1.63648	0.89429	1.47764
	1269.8	928.37	597.64							1.36469	0.997743	0.642299
	1062.1	822.15	633.18							1.14147	0.883586	0.680495
	1542.1	863.95	705.33							1.65733	0.928509	0.758036
	975.32	915.74	1219.5							1.0482	0.984169	1.31063
	877.04	834.57	691.11							0.942577	0.896934	0.742754
	1178.7	747.11	954.14							1.26678	0.802938	1.02544
	909.68	1583	665.15							0.977656	1.70129	0.714854
	1191.9	973.87	629.08							1.28097	1.04664	0.676088
	766.75	1142.7	761.74							0.824046	1.22809	0.818662
	856.7	961.17	738.59							0.920717	1.03299	0.793782
	1584	1042.9	1114.5							1.70237	1.12083	1.19778
	1949.4	1094.8	938.07							2.09507	1.17661	1.00817
	951.61	1347.1	870.81							1.02272	1.44776	0.935882
	931.89	1188.9	844.91							1.00153	1.27774	0.908046
	944.05	816.74	758.4							1.01459	0.877771	0.815072
	806.87	792.61	973.41							0.867164	0.851838	1.04615
	1183.6	693.93	723.99							1.27205	0.745784	0.778091
	1256.8	780.68	1304.7							1.35072	0.839017	1.40219
	1225.9	657.7	1127.4							1.31751	0.706847	1.21165
	1360.3	700.54	1477.3							1.46195	0.752888	1.58769
	862.45	903.14	1119.2							0.926897	0.970628	1.20283
	888.29	875.11	740.06							0.954668	0.940503	0.795361
	1083.9	885.29	866.03							1.1649	0.951444	0.930745
	976.53	1004.8	1019.5							1.0495	1.07988	1.09568
	863.49	851.69	1014.9							0.928015	0.915333	1.09074
	1516.6	807.42	729.57							1.62993	0.867755	0.784088
	1089.2	809.42	1222.3							1.17059	0.869904	1.31364
	1336	758.59	756.23							1.43583	0.815276	0.81274
	770.58	756.94	808.29							0.828162	0.813503	0.86869
	696.65	620.37	869.96							0.748708	0.666728	0.934968
	774.34	779.98	715.45							0.832203	0.838265	0.768912
	1118	830.02	699.05							1.20154	0.892044	0.751287
	634.14	824.55	1998.8							0.681527	0.886165	2.14816
	795.68	662.51	1268							0.855138	0.712017	1.36275
	676.32	708.81	814.49							0.726858	0.761776	0.875353
	896.09	704.56	956.51							0.963051	0.757209	1.02799
	941.89	641.89	876.48							1.01227	0.689856	0.941976
	675.96	790.24	796.49							0.726472	0.849291	0.856008
	603.39	695.48	896.93							0.648479	0.74745	0.963954
	851.38	670.28	1019.7							0.915	0.720367	1.0959
	705.68	870.61	978.91							0.758412	0.935667	1.05206
	761.67	659.82	671.68							0.818586	0.709125	0.721872
	702.04	763.28	1201.4							0.7545	0.820317	1.29118
	979.18	612	840.11							1.05235	0.657732	0.902888
	885.67		808.47							0.951852		0.868883
	832.11		865.54							0.89429		0.930218
	909.96		832.51							0.977957		0.89472
	984.37		832.51							1.05793		0.89472
	1128.1									1.2124
	1001.9									1.07677
	1294.4									1.39112
	1117.4									1.2009
	1321.1									1.41982
	644.25									0.692392
	921.5									0.99036
	821.34									0.882715
	830.94									0.893033
	1079.9									1.1606
	1254.9									1.34867
	960.51									1.03228
	913.36									0.981611
	1034.2									1.11148
	890.45									0.956989

## Sheet: 20171124
Ctrl	TPEN		Values normalized by Ctl median =>	1366.45		Ctrl-norm	TPEN-norm
1575	1555.2					1.15262	1.13813
1344	817.77					0.983571	0.598463
1256.2	1762					0.919316	1.28947
1519.6	844.97					1.11208	0.618369
1047	1747.4					0.766219	1.27879
1661.6	1101.3					1.216	0.805957
1728.2	1162.8					1.26474	0.850964
1102.3	893.15					0.806689	0.653628
1393	893.15					1.01943	0.653628
1016.9	1183.6					0.744191	0.866186
1009.6	965.85					0.738849	0.706832
1140.3	909.59					0.834498	0.665659
1289.7	759.09					0.943833	0.55552
1004.1	755.32					0.734824	0.552761
1248.1	1483.7					0.913389	1.08581
1255.5	1345.4					0.918804	0.984595
1692.4	1026.2					1.23854	0.750997
998.16	1044.7					0.730477	0.764536
1339.2	1138.9					0.980058	0.833474
1751.3	1136.1					1.28164	0.831424
1390.9	1082.3					1.01789	0.792052
1847.1	1523.4					1.35175	1.11486
1359.8	1488.4					0.995133	1.08925
1753.9	1486.4					1.28354	1.08778
1542.3	1406.4					1.12869	1.02924
2418.8	1327.9					1.77013	0.971788
2194.4	1137.6					1.60591	0.832522
1407.3	983.28					1.02989	0.719587
1221.5	1093.2					0.893922	0.800029
1525.4	1573.2					1.11632	1.1513
1336.1	1075.3					0.977789	0.78693
1550	1130.1					1.13433	0.827034
1232.5	887.17					0.901972	0.649252
1373.1	1231.2					1.00487	0.901021
	1188.8						0.869992

## Sheet: 20171215
Ctrl	TPEN	TPEN+Zn		Values normalized by Ctl median =>		1823.5		Ctrl-norm	TPEN-norm	TPEN+Zn-norm
1779.3	1822.9	1462						0.975761	0.999671	0.801755
1703.7	1565.1	1668.8						0.934302	0.858294	0.915163
2071.2	1839	1430.7						1.13584	1.0085	0.78459
1807.8	1436.2	1096						0.99139	0.787606	0.601042
1883.1	1757.5	1362						1.03268	0.963806	0.746915
1978.5	1632.3	1483.6						1.085	0.895147	0.8136
2155.4	1643.8	1070.2						1.18201	0.901453	0.586893
1744.8	1449	1871						0.956841	0.794626	1.02605
2011.8	1813.5	1532.5						1.10326	0.994516	0.840417
2121.9	1740.3	1265.2						1.16364	0.954373	0.693831
1727.4	1495.2	2103.2						0.947299	0.819962	1.15339
2114.1	1364.4	1532.6						1.15936	0.748231	0.840472
1955.4	1322.9	1442.4						1.07233	0.725473	0.791006
1825	1597.7	1357.8						1.00082	0.876172	0.744612
2748.9	1485.8	1685.9						1.50749	0.814807	0.924541
2492.6	1096.8	1557.2						1.36693	0.601481	0.853962
2395.7	1426.1	1620.1						1.31379	0.782067	0.888456
1628.5	1544	1765.3						0.893063	0.846723	0.968083
2421.1	1292.8	1478.1						1.32772	0.708966	0.810584
2569	1781.4	1353.1						1.40883	0.976913	0.742035
1585.1	1365.7	1860.7						0.869262	0.748944	1.0204
1167.2	1345.9	2261.3						0.640088	0.738086	1.24009
2070.8	993.9	1645.2						1.13562	0.545051	0.902221
1859	866	1933.6						1.01947	0.474911	1.06038
1558.8	1054	2165.3						0.85484	0.578009	1.18744
2031.8	1256.3	1580.5						1.11423	0.68895	0.86674
1489.7	1318.6	1598.9						0.816945	0.723115	0.87683
1477.3	1105.6	2154.4						0.810145	0.606307	1.18146
1191	997.61	2161.2						0.65314	0.547085	1.18519
1501.2	1196.6	1552.4						0.823252	0.656211	0.85133
1658.6	1769.1	2008.7						0.90957	0.970167	1.10156
1823.5	1089.2	1635.7						1	0.597313	0.897011
2082.7	1115	1677.2						1.14214	0.611461	0.91977
1299.7	1102.1	1872						0.71275	0.604387	1.0266
1830.2	2017.1	1396.1						1.00367	1.10617	0.765616
1278.4	1175.8	1879.5						0.701069	0.644804	1.03071
1430.7	1492.8	2100.1						0.78459	0.818645	1.15169
1388.6	998.79	1534.2						0.761503	0.547732	0.841349
1629.2	1142.4	1567.6						0.893447	0.626488	0.859665
2404.5	1141.1	2360.6						1.31862	0.625775	1.29454
1161.1	1623.2	1357.3						0.636743	0.890156	0.744338
	1427	1340.4							0.782561	0.73507
	1664.5								0.912805
	1182								0.648204
	1302.2								0.714121
