# Supplementary material for: Correlating STED and synchrotron XRF nano-imaging unveils cosegregation of metals and cytoskeleton proteins in dendrites
Source: eLife journal article supplement (doi:10.7554/elife.62334), 2020-12-08
Supplement: supp [file elife-62334-supp-v1.zip › elife_poa_e62334_Source_data_1.xlsx]

## Sheet: ROI
	ROI	element	area (pixel)	mean (ng/mm²)	SD	ng/nm²	ng/pixel	element mass (ng)	atoms/pixel	atoms/nm²
	ROI1 (TA15-n23-fine01)	P	40	0.686	0.141	6.86e-13	1.0976e-09	5.14514e-14	21332.7	13.333
		S	40	0.194	0.053	1.94e-13	3.104e-10	5.32558e-14	5828.47	3.64279
		Zn	40	0.011	0.002	1.1e-14	1.76e-11	1.08588e-13	162.08	0.1013
		K	40	0.187	0.051	1.87e-13	2.992e-10	6.49473e-14	4606.81	2.87926
	ROI2 (TA15-n23-fine01)	P	58	0.707	0.187	7.07e-13	1.1312e-09	5.14514e-14	21985.8	13.7411
		S	58	0.232	0.075	2.32e-13	3.712e-10	5.32558e-14	6970.13	4.35633
		Zn	58	0.011	0.002	1.1e-14	1.76e-11	1.08588e-13	162.08	0.1013
		K	58	0.169	0.039	1.69e-13	2.704e-10	6.49473e-14	4163.38	2.60211
	ROI3 (TA15-n26-fine01)	P	55	0.591	0.143	5.91e-13	9.456e-10	5.14514e-14	18378.5	11.4866
		S	55	0.161	0.048	1.61e-13	2.576e-10	5.32558e-14	4837.03	3.02314
		Zn	55	0.009	0.002	9e-15	1.44e-11	1.08588e-13	132.611	0.0828821
		K	55	0.076	0.021	7.6e-14	1.216e-10	6.49473e-14	1872.29	1.17018
	ROI4 (TA15-n26-fine01)	P	64	0.567	0.122	5.67e-13	9.072e-10	5.14514e-14	17632.2	11.0201
		S	64	0.153	0.048	1.53e-13	2.448e-10	5.32558e-14	4596.68	2.87293
		Zn	64	0.009	0.002	9e-15	1.44e-11	1.08588e-13	132.611	0.0828821
		K	64	0.071	0.017	7.1e-14	1.136e-10	6.49473e-14	1749.11	1.09319
	ROI5 (TA15-n26-fine01)	P	63	0.609	0.137	6.09e-13	9.744e-10	5.14514e-14	18938.2	11.8364
		S	63	0.163	0.055	1.63e-13	2.608e-10	5.32558e-14	4897.12	3.0607
		Zn	63	0.009	0.002	9e-15	1.44e-11	1.08588e-13	132.611	0.0828821
		K	63	0.076	0.021	7.6e-14	1.216e-10	6.49473e-14	1872.29	1.17018
	ROI6 (TA15-n26-fine01)	P	57	0.57	0.102	5.7e-13	9.12e-10	5.14514e-14	17725.5	11.0784
		S	57	0.161	0.055	1.61e-13	2.576e-10	5.32558e-14	4837.03	3.02314
		Zn	57	0.009	0.002	9e-15	1.44e-11	1.08588e-13	132.611	0.0828821
		K	57	0.078	0.019	7.8e-14	1.248e-10	6.49473e-14	1921.56	1.20097
	ROI7 (TA15-n23-fine02)	P	102	0.445	0.102	4.45e-13	7.12e-10	5.14514e-14	13838.3	8.64893
		S	102	0.156	0.044	1.56e-13	2.496e-10	5.32558e-14	4686.81	2.92926
		Zn	102	0.009	0.002	9e-15	1.44e-11	1.08588e-13	132.611	0.0828821
		K	102	0.123	0.022	1.23e-13	1.968e-10	6.49473e-14	3030.15	1.89384
	ROI8 (TA15-n23-fine02)	P	96	0.402	0.096	4.02e-13	6.432e-10	5.14514e-14	12501.1	7.81319
		S	96	0.137	0.044	1.37e-13	2.192e-10	5.32558e-14	4115.98	2.57249
		Zn	96	0.009	0.002	9e-15	1.44e-11	1.08588e-13	132.611	0.0828821
		K	96	0.114	0.028	1.14e-13	1.824e-10	6.49473e-14	2808.43	1.75527
	ROI9 (TA15-n23-fine02)	P	76	0.468	0.116	4.68e-13	7.488e-10	5.14514e-14	14553.5	9.09596
		S	76	0.172	0.046	1.72e-13	2.752e-10	5.32558e-14	5167.51	3.22969
		Zn	76	0.009	0.002	9e-15	1.44e-11	1.08588e-13	132.611	0.0828821
		K	76	0.133	0.023	1.33e-13	2.128e-10	6.49473e-14	3276.5	2.04781
	ROI10 (TA15-n23-fine02)	P	72	0.487	0.113	4.87e-13	7.792e-10	5.14514e-14	15144.4	9.46524
		S	72	0.171	0.047	1.71e-13	2.736e-10	5.32558e-14	5137.47	3.21092
		Zn	72	0.009	0.002	9e-15	1.44e-11	1.08588e-13	132.611	0.0828821
		K	72	0.134	0.024	1.34e-13	2.144e-10	6.49473e-14	3301.14	2.06321
	ROI11 (TA15-n23-fine02)	P	33	0.438	0.092	4.38e-13	7.008e-10	5.14514e-14	13620.6	8.51288
		S	33	0.14	0.041	1.4e-13	2.24e-10	5.32558e-14	4206.11	2.62882
		Zn	33	0.009	0.002	9e-15	1.44e-11	1.08588e-13	132.611	0.0828821
		K	33	0.12	0.026	1.2e-13	1.92e-10	6.49473e-14	2956.24	1.84765
	ROI12 (TA15-n59-fine01)	P	92	0.51	0.131	5.1e-13	8.16e-10	5.14514e-14	15859.6	9.91226
		S	92	0.289	0.106	2.89e-13	4.624e-10	5.32558e-14	8682.62	5.42664
		Zn	92	0.014	0.003	1.4e-14	2.24e-11	1.08588e-13	206.284	0.128928
		K	92	0.212	0.048	2.12e-13	3.392e-10	6.49473e-14	5222.7	3.26418
	ROI13 (TA15-n59-fine01)	P	74	0.354	0.089	3.54e-13	5.664e-10	5.14514e-14	11008.4	6.88028
		S	74	0.162	0.046	1.62e-13	2.592e-10	5.32558e-14	4867.07	3.04192
		Zn	74	0.01	0.002	1e-14	1.6e-11	1.08588e-13	147.346	0.0920912
		K	74	0.129	0.078	1.29e-13	2.064e-10	6.49473e-14	3177.96	1.98623
	ROI14 (TA15-n64-fine02)	P	103	0.948	0.184	9.48e-13	1.5168e-09	5.14514e-14	29480.2	18.4251
		S	103	0.385	0.111	3.85e-13	6.16e-10	5.32558e-14	11566.8	7.22926
		Zn	103	0.011	0.002	1.1e-14	1.76e-11	1.08588e-13	162.08	0.1013
		K	103	0.305	0.108	3.05e-13	4.88e-10	6.49473e-14	7513.78	4.69612
	ROI15 (TA15-n64-fine02)	P	72	0.933	0.176	9.33e-13	1.4928e-09	5.14514e-14	29013.8	18.1336
		S	72	0.332	0.082	3.32e-13	5.312e-10	5.32558e-14	9974.5	6.23406
		Zn	72	0.011	0.002	1.1e-14	1.76e-11	1.08588e-13	162.08	0.1013
		K	72	0.297	0.057	2.97e-13	4.752e-10	6.49473e-14	7316.7	4.57294
	ROI16 (TA15-n64-fine02)	P	13	0.654	0.149	6.54e-13	1.0464e-09	5.14514e-14	20337.6	12.711
		S	13	0.194	0.058	1.94e-13	3.104e-10	5.32558e-14	5828.47	3.64279
		Zn	13	0.009	0.002	9e-15	1.44e-11	1.08588e-13	132.611	0.0828821
		K	13	0.252	0.054	2.52e-13	4.032e-10	6.49473e-14	6208.11	3.88007
	ROI17 (TA15-n64-fine05)	P	81	0.838	0.194	8.38e-13	1.3408e-09	5.14514e-14	26059.5	16.2872
		S	81	0.283	0.072	2.83e-13	4.528e-10	5.32558e-14	8502.36	5.31397
		Zn	81	0.011	0.002	1.1e-14	1.76e-11	1.08588e-13	162.08	0.1013
		K	81	0.266	0.085	2.66e-13	4.256e-10	6.49473e-14	6553.01	4.09563
	ROI18 (TA15-n64-fine05)	P	79	0.792	0.146	7.92e-13	1.2672e-09	5.14514e-14	24629.1	15.3932
		S	79	0.228	0.056	2.28e-13	3.648e-10	5.32558e-14	6849.96	4.28122
		Zn	79	0.01	0.002	1e-14	1.6e-11	1.08588e-13	147.346	0.0920912
		K	79	0.26	0.045	2.6e-13	4.16e-10	6.49473e-14	6405.19	4.00325
	ROI19 (TA15-n64-fine05)	P	110	0.795	0.157	7.95e-13	1.272e-09	5.14514e-14	24722.3	15.4515
		S	110	0.309	0.07	3.09e-13	4.944e-10	5.32558e-14	9283.49	5.80218
		Zn	110	0.01	0.002	1e-14	1.6e-11	1.08588e-13	147.346	0.0920912
		K	110	0.298	0.051	2.98e-13	4.768e-10	6.49473e-14	7341.34	4.58834
	ROI20 (TA15-n71-fine01)	P	63	0.452	0.107	4.52e-13	7.232e-10	5.14514e-14	14056	8.78498
		S	63	0.191	0.053	1.91e-13	3.056e-10	5.32558e-14	5738.34	3.58646
		Zn	63	0.01	0.002	1e-14	1.6e-11	1.08588e-13	147.346	0.0920912
		K	63	0.087	0.023	8.7e-14	1.392e-10	6.49473e-14	2143.28	1.33955
	ROI21 (TA15-n71-fine01)	P	94	0.515	0.124	5.15e-13	8.24e-10	5.14514e-14	16015.1	10.0094
		S	94	0.222	0.068	2.22e-13	3.552e-10	5.32558e-14	6669.69	4.16856
		Zn	94	0.01	0.002	1e-14	1.6e-11	1.08588e-13	147.346	0.0920912
		K	94	0.119	0.038	1.19e-13	1.904e-10	6.49473e-14	2931.61	1.83225

## Sheet: mean
	Phosphorus						Sulfur						Zinc						Potassium
	Element	Area (pixel)	ng/mm²	atoms/nm²			Element	Area	ng/mm²	atoms/nm²			Element	Area (pixel)	ng/mm²	atoms/nm²			Element	Area (pixel)	ng/mm²	atoms/nm²		S atoms/pixel	Zn atoms/pixel	S/Zn
	P	40	0.686	13.333			S	40	0.194	3.64279			Zn	40	0.011	0.1013			K	40	0.187	2.87926		3.64279	0.1013	35.9604
	P	58	0.707	13.7411			S	58	0.232	4.35633			Zn	58	0.011	0.1013			K	58	0.169	2.60211		4.35633	0.1013	43.0041
	P	55	0.591	11.4866			S	55	0.161	3.02314			Zn	55	0.009	0.0828821			K	55	0.076	1.17018		3.02314	0.0828821	36.4753
	P	64	0.567	11.0201			S	64	0.153	2.87293			Zn	64	0.009	0.0828821			K	64	0.071	1.09319		2.87293	0.0828821	34.6628
	P	63	0.609	11.8364			S	63	0.163	3.0607			Zn	63	0.009	0.0828821			K	63	0.076	1.17018		3.0607	0.0828821	36.9284
	P	57	0.57	11.0784			S	57	0.161	3.02314			Zn	57	0.009	0.0828821			K	57	0.078	1.20097		3.02314	0.0828821	36.4753
	P	102	0.445	8.64893			S	102	0.156	2.92926			Zn	102	0.009	0.0828821			K	102	0.123	1.89384		2.92926	0.0828821	35.3425
	P	96	0.402	7.81319			S	96	0.137	2.57249			Zn	96	0.009	0.0828821			K	96	0.114	1.75527		2.57249	0.0828821	31.0379
	P	76	0.468	9.09596			S	76	0.172	3.22969			Zn	76	0.009	0.0828821			K	76	0.133	2.04781		3.22969	0.0828821	38.9674
	P	72	0.487	9.46524			S	72	0.171	3.21092			Zn	72	0.009	0.0828821			K	72	0.134	2.06321		3.21092	0.0828821	38.7408
	P	33	0.438	8.51288			S	33	0.14	2.62882			Zn	33	0.009	0.0828821			K	33	0.12	1.84765		2.62882	0.0828821	31.7176
	P	92	0.51	9.91226			S	92	0.289	5.42664			Zn	92	0.014	0.128928			K	92	0.212	3.26418		5.42664	0.128928	42.0906
	P	74	0.354	6.88028			S	74	0.162	3.04192			Zn	74	0.01	0.0920912			K	74	0.129	1.98623		3.04192	0.0920912	33.0316
	P	103	0.948	18.4251			S	103	0.385	7.22926			Zn	103	0.011	0.1013			K	103	0.305	4.69612		7.22926	0.1013	71.3646
	P	72	0.933	18.1336			S	72	0.332	6.23406			Zn	72	0.011	0.1013			K	72	0.297	4.57294		6.23406	0.1013	61.5404
	P	13	0.654	12.711			S	13	0.194	3.64279			Zn	13	0.009	0.0828821			K	13	0.252	3.88007		3.64279	0.0828821	43.9515
	P	81	0.838	16.2872			S	81	0.283	5.31397			Zn	81	0.011	0.1013			K	81	0.266	4.09563		5.31397	0.1013	52.4576
	P	79	0.792	15.3932			S	79	0.228	4.28122			Zn	79	0.01	0.0920912			K	79	0.26	4.00325		4.28122	0.0920912	46.489
	P	110	0.795	15.4515			S	110	0.309	5.80218			Zn	110	0.01	0.0920912			K	110	0.298	4.58834		5.80218	0.0920912	63.0048
	P	63	0.452	8.78498			S	63	0.191	3.58646			Zn	63	0.01	0.0920912			K	63	0.087	1.33955		3.58646	0.0920912	38.9447
	P	94	0.515	10.0094			S	94	0.222	4.16856			Zn	94	0.01	0.0920912			K	94	0.119	1.83225		4.16856	0.0920912	45.2656
	mean=		0.607667	11.8105			mean=		0.21119	3.96559			mean=		0.00995238	0.0916526			mean=		0.166952	2.57058			mean S:Zn	42.7358
	Standar Deviation=		0.169539	3.29513			Standar Deviation=		0.0680858	1.27847			Standar Deviation=		0.00121405	0.0111803			Standar Deviation=		0.0799568	1.2311			Standard Deviation	10.6365
