# Supplementary material for: Correlating STED and synchrotron XRF nano-imaging unveils cosegregation of metals and cytoskeleton proteins in dendrites
Source: eLife journal article supplement (doi:10.7554/elife.62334), 2020-12-08
Supplement: supp [file elife-62334-supp-v1.zip › elife_poa_e62334_Supplementary_file_1.docx]

|  | **Phosphorus** | **Sulfur** | **Potassium** | **Zinc** |
| --- | --- | --- | --- | --- |
| ng.mm-2 | 0.607 ± 0.169 | 0.211 ± 0.068 | 0.167 ± 0.080 | 0.010 ± 0.001 |
| atoms.nm-2 | 11.81 ± 3.29 | 3.97 ± 1.28 | 2.57 ± 1.23 | 0.09 ± 0.01 |
