# Supplementary material for: Correlating STED and synchrotron XRF nano-imaging unveils cosegregation of metals and cytoskeleton proteins in dendrites
Source: eLife journal article supplement (doi:10.7554/elife.62334), 2020-12-08
Supplement: supp [file elife-62334-supp-v1.zip › elife_poa_e62334_Table_1_source_data_1.xlsx]

## Sheet: P
	P
		area	mean	StdDev	min	max
	B1-TA15-n23-fine01	610	0.275	0.083	0.027	0.566
	B2-TA15-n26-fine01	2844	0.366	0.095	0.08	0.763
	B3-TA15-n26-fine01	845	0.41	0.101	0.069	0.759
	B4-TA15-n23-fine02	1047	0.261	0.078	0.036	0.571
	B5-TA15-n23-fine02	802	0.273	0.084	0.054	0.581
	B6-TA15-n59-fine01	388	0.316	0.082	0.101	0.574
	B7-TA15-n59-fine01	336	0.304	0.093	0.087	0.631
	B8-TA15-n64-fine02	341	0.428	0.1	0.089	0.715
	B9-TA15-n64-fine02	252	0.439	0.113	0.174	0.779
	B10-TA15-n71-fine01	1753	0.304	0.085	0.032	0.556
	B11-TA15-n71-fine01	1082	0.283	0.085	0.056	0.581
	B12-TA15-n23-fine01	776	0.315	0.087	0.091	0.661
		mean	0.331167
		SD	0.0606779			P atomic mass (g)
						5.14514e-23
		3*SD	0.182034
		mean + 3*SD	0.5132
		ng/pixel	8.21121e-10
		g/pixel	8.21121e-19
	LOD	atoms/pixel	15959.1

## Sheet: S
		S
			area	mean	StdDev	min	max
		B1-TA15-n23-fine01	610	0.083	0.031	0.01	0.223
		B2-TA15-n26-fine01	2844	0.088	0.03	0.013	0.23
		B3-TA15-n26-fine01	845	0.096	0.032	0.018	0.205
		B4-TA15-n23-fine02	1047	0.082	0.03	0.009	0.186
		B5-TA15-n23-fine02	802	0.082	0.029	0.01	0.184
		B6-TA15-n59-fine01	388	0.095	0.032	0.005	0.202
		B7-TA15-n59-fine01	336	0.094	0.031	0.028	0.177
		B8-TA15-n64-fine02	341	0.123	0.036	0.029	0.239
		B9-TA15-n64-fine02	252	0.126	0.037	0.047	0.258
		B10-TA15-n71-fine01	1753	0.085	0.03	0.006	0.196
		B11-TA15-n71-fine01	1082	0.088	0.03	0.007	0.187
		B12-TA15-n23-fine01	776	0.103	0.034	0.011	0.237
			mean	0.0954167				S atomic mass (g)
			SD	0.0144017				5.32558e-23
			3*SD	0.0432052
			mean + 3*SD	0.138622
			ng/pixel	2.21795e-10
			g/pixel	2.21795e-19
		LOD	atoms/pixel	4164.71

## Sheet: Zn
	Zn
		area	mean	StdDev	min	max
	B1-TA15-n23-fine01	610	0.007	0.001	0.003	0.012
	B2-TA15-n26-fine01	2844	0.007	0.001	0.002	0.012
	B3-TA15-n26-fine01	845	0.007	0.001	0.003	0.012
	B4-TA15-n23-fine02	1047	0.007	0.001	0.003	0.011
	B5-TA15-n23-fine02	802	0.007	0.001	0.003	0.011
	B6-TA15-n59-fine01	388	0.008	0.002	0.004	0.014
	B7-TA15-n59-fine01	336	0.008	0.001	0.003	0.013
	B8-TA15-n64-fine02	341	0.008	0.001	0.004	0.013
	B9-TA15-n64-fine02	252	0.008	0.001	0.005	0.013
	B10-TA15-n71-fine01	1753	0.007	0.001	0.003	0.012
	B11-TA15-n71-fine01	1082	0.007	0.001	0.002	0.011
	B12-TA15-n23-fine01	776	0.007	0.001	0.003	0.012
		mean	0.00733333			Zn atomic mass (g)
		SD	0.000471405			1.08588e-22
		3*SD	0.00141421
		mean + 3*SD	0.00874755
		ng/pixel	1.39961e-11
		g/pixel	1.39961e-20
	LOD	atoms/pixel	128.891

## Sheet: K
	K
		area	mean	StdDev	min	max
	B1-TA15-n23-fine01	610	0.084	0.016	0.036	0.134
	B2-TA15-n26-fine01	2844	0.047	0.012	0.013	0.087
	B3-TA15-n26-fine01	845	0.05	0.012	0.019	0.09
	B4-TA15-n23-fine02	1047	0.071	0.016	0.026	0.189
	B5-TA15-n23-fine02	802	0.075	0.015	0.031	0.133
	B6-TA15-n59-fine01	388	0.112	0.021	0.053	0.179
	B7-TA15-n59-fine01	336	0.109	0.019	0.057	0.181
	B8-TA15-n64-fine02	341	0.106	0.02	0.059	0.194
	B9-TA15-n64-fine02	252	0.111	0.019	0.058	0.166
	B10-TA15-n71-fine01	1753	0.058	0.014	0.02	0.113
	B11-TA15-n71-fine01	1082	0.054	0.013	0.015	0.1
	B12-TA15-n23-fine01	776	0.089	0.017	0.041	0.152
			mean	0.0805
			SD	0.0238939			K atomic mass (g)
							6.49473e-23
			3*SD	0.0716816
			mean + 3*SD	0.152182
			ng/pixel	2.43491e-10
			g/pixel	2.43491e-19
		LOD	atoms/pixel	3749.05
