# Supplementary material for: Correlating STED and synchrotron XRF nano-imaging unveils cosegregation of metals and cytoskeleton proteins in dendrites
Source: eLife journal article supplement (doi:10.7554/elife.62334), 2020-12-08
Supplement: supp [file Fig 4i P_S_Zn_ngmm2_wobg.xlsx]

## Sheet: Feuil1
X	Y	P	S	Zn
0	0
1	0
2	0
3	0
4	0		0.203682
5	0
6	0
7	0
8	0
9	0
10	0
11	0		0.274618
12	0
13	0
14	0
15	0
16	0
17	0
18	0
19	0
20	0		0.196336	0.0110582
21	0
22	0		0.229404
23	0
24	0
25	0
26	0
27	0
28	0
29	0
30	0
31	0
32	0
33	0
34	0
35	0
36	0
37	0
38	0
39	0
40	0
41	0
42	0
43	0
44	0
45	0
46	0		0.18939
47	0
48	0
49	0
50	0
51	0		0.181584	0.0111446
52	0
53	0
54	0
55	0
56	0
57	0
58	0
59	0
60	0
61	0
62	0
63	0
64	0
65	0
66	0
67	0
68	0
69	0
70	0
71	0
72	0
73	0
74	0
75	0
76	0
77	0
78	0
79	0
80	0
81	0
82	0
83	0
84	0
85	0
86	0
87	0
88	0
89	0
90	0
91	0
92	0
93	0
94	0
95	0
96	0
97	0
98	0
99	0
100	0
101	0
102	0
103	0
104	0
105	0
106	0
107	0
108	0
109	0
110	0
111	0
112	0
113	0
114	0
115	0
116	0
117	0
118	0
119	0
120	0
121	0
122	0
123	0
124	0
125	0
126	0
127	0
128	0
129	0
130	0
131	0
132	0
133	0
134	0
135	0
136	0
137	0
138	0
139	0
140	0
141	0
142	0
143	0
144	0
145	0
146	0
147	0
148	0
149	0
150	0
151	0
152	0
153	0
154	0
155	0
156	0
157	0
0	1
1	1
2	1
3	1
4	1
5	1
6	1
7	1
8	1
9	1
10	1		0.25458
11	1			0.0130735
12	1		0.202518
13	1
14	1
15	1
16	1
17	1
18	1
19	1
20	1
21	1
22	1
23	1
24	1
25	1
26	1
27	1
28	1
29	1
30	1
31	1
32	1
33	1
34	1
35	1
36	1
37	1
38	1
39	1
40	1
41	1
42	1
43	1
44	1
45	1
46	1
47	1
48	1
49	1
50	1
51	1
52	1
53	1
54	1
55	1
56	1
57	1
58	1
59	1
60	1
61	1
62	1
63	1
64	1
65	1
66	1
67	1
68	1
69	1
70	1
71	1
72	1
73	1
74	1
75	1
76	1
77	1
78	1
79	1
80	1
81	1
82	1
83	1
84	1
85	1
86	1		0.187808
87	1
88	1
89	1
90	1
91	1
92	1
93	1
94	1
95	1
96	1
97	1
98	1
99	1
100	1
101	1
102	1
103	1
104	1
105	1
106	1
107	1
108	1
109	1
110	1
111	1
112	1
113	1
114	1
115	1		0.187126
116	1
117	1
118	1
119	1
120	1
121	1
122	1
123	1
124	1
125	1
126	1
127	1
128	1
129	1
130	1
131	1
132	1
133	1
134	1
135	1
136	1
137	1
138	1
139	1
140	1
141	1
142	1
143	1
144	1
145	1
146	1
147	1
148	1
149	1
150	1
151	1
152	1
153	1
154	1
155	1
156	1
157	1
0	2
1	2
2	2
3	2
4	2
5	2
6	2
7	2
8	2
9	2
10	2		0.182083
11	2		0.215568
12	2
13	2
14	2
15	2
16	2
17	2
18	2
19	2
20	2
21	2
22	2
23	2
24	2
25	2
26	2
27	2
28	2
29	2
30	2
31	2
32	2
33	2
34	2
35	2
36	2
37	2
38	2
39	2
40	2
41	2
42	2
43	2
44	2
45	2
46	2
47	2
48	2
49	2
50	2
51	2
52	2
53	2
54	2
55	2
56	2
57	2
58	2
59	2
60	2
61	2
62	2
63	2
64	2
65	2
66	2
67	2
68	2
69	2
70	2
71	2
72	2
73	2
74	2
75	2
76	2
77	2
78	2
79	2
80	2
81	2
82	2
83	2
84	2
85	2
86	2
87	2
88	2
89	2
90	2
91	2
92	2
93	2
94	2
95	2
96	2
97	2
98	2
99	2
100	2
101	2
102	2
103	2
104	2
105	2
106	2
107	2
108	2
109	2
110	2
111	2
112	2
113	2
114	2
115	2
116	2
117	2
118	2
119	2
120	2
121	2
122	2
123	2
124	2
125	2
126	2
127	2
128	2
129	2
130	2
131	2
132	2
133	2
134	2
135	2
136	2
137	2
138	2
139	2
140	2
141	2
142	2
143	2
144	2
145	2
146	2
147	2
148	2
149	2
150	2
151	2
152	2
153	2
154	2
155	2
156	2
157	2
0	3
1	3
2	3
3	3
4	3
5	3
6	3
7	3
8	3
9	3		0.261926
10	3
11	3			0.011523
12	3
13	3
14	3
15	3
16	3
17	3
18	3
19	3
20	3
21	3
22	3
23	3
24	3
25	3
26	3
27	3
28	3
29	3
30	3
31	3
32	3
33	3
34	3
35	3
36	3
37	3
38	3
39	3
40	3
41	3
42	3
43	3
44	3
45	3
46	3
47	3
48	3
49	3
50	3
51	3
52	3
53	3
54	3
55	3
56	3
57	3
58	3
59	3
60	3
61	3
62	3
63	3
64	3
65	3
66	3
67	3
68	3
69	3
70	3
71	3
72	3
73	3
74	3
75	3
76	3
77	3
78	3
79	3
80	3
81	3
82	3
83	3
84	3
85	3
86	3
87	3
88	3
89	3
90	3
91	3
92	3
93	3
94	3
95	3
96	3
97	3
98	3
99	3
100	3
101	3
102	3
103	3
104	3
105	3
106	3
107	3
108	3
109	3		0.18328
110	3
111	3
112	3
113	3
114	3
115	3
116	3
117	3
118	3
119	3
120	3
121	3
122	3
123	3
124	3
125	3
126	3
127	3
128	3
129	3
130	3
131	3
132	3
133	3
134	3
135	3
136	3
137	3
138	3
139	3
140	3
141	3
142	3
143	3
144	3
145	3
146	3
147	3
148	3
149	3
150	3		0.186191
151	3
152	3
153	3
154	3
155	3
156	3
157	3
0	4
1	4
2	4
3	4
4	4
5	4
6	4
7	4
8	4
9	4
10	4
11	4
12	4
13	4
14	4
15	4
16	4
17	4
18	4
19	4
20	4
21	4
22	4
23	4
24	4
25	4
26	4
27	4
28	4
29	4
30	4
31	4
32	4	0.567748
33	4
34	4
35	4
36	4
37	4
38	4
39	4
40	4
41	4
42	4
43	4
44	4
45	4
46	4
47	4
48	4
49	4
50	4
51	4
52	4
53	4
54	4
55	4
56	4
57	4
58	4
59	4
60	4
61	4
62	4
63	4
64	4
65	4
66	4
67	4
68	4
69	4
70	4
71	4
72	4
73	4
74	4
75	4
76	4
77	4
78	4
79	4
80	4
81	4
82	4
83	4
84	4
85	4
86	4
87	4
88	4
89	4
90	4
91	4
92	4
93	4
94	4
95	4
96	4
97	4
98	4
99	4
100	4
101	4
102	4
103	4
104	4
105	4
106	4
107	4
108	4
109	4
110	4
111	4
112	4
113	4
114	4
115	4
116	4
117	4
118	4
119	4
120	4
121	4
122	4
123	4
124	4
125	4
126	4
127	4
128	4
129	4
130	4
131	4
132	4
133	4
134	4
135	4
136	4
137	4
138	4
139	4
140	4
141	4
142	4
143	4
144	4
145	4
146	4
147	4
148	4
149	4
150	4
151	4
152	4
153	4
154	4
155	4
156	4
157	4
0	5
1	5
2	5
3	5
4	5
5	5
6	5
7	5		0.195437
8	5
9	5
10	5
11	5
12	5
13	5
14	5
15	5
16	5
17	5
18	5
19	5
20	5			0.0114761
21	5
22	5
23	5
24	5
25	5
26	5
27	5
28	5
29	5
30	5
31	5
32	5
33	5
34	5
35	5
36	5
37	5
38	5
39	5
40	5
41	5
42	5
43	5
44	5
45	5
46	5
47	5
48	5
49	5
50	5
51	5
52	5		0.181581
53	5
54	5	0.56767
55	5
56	5
57	5
58	5
59	5
60	5
61	5
62	5
63	5
64	5
65	5
66	5
67	5
68	5
69	5
70	5
71	5
72	5
73	5
74	5
75	5
76	5
77	5
78	5
79	5
80	5
81	5
82	5
83	5
84	5
85	5
86	5
87	5
88	5
89	5
90	5
91	5
92	5
93	5
94	5
95	5
96	5
97	5
98	5
99	5
100	5
101	5
102	5
103	5
104	5
105	5
106	5
107	5
108	5
109	5
110	5
111	5
112	5
113	5
114	5
115	5
116	5
117	5
118	5
119	5
120	5
121	5
122	5
123	5
124	5
125	5
126	5
127	5
128	5
129	5
130	5
131	5
132	5
133	5
134	5
135	5
136	5
137	5
138	5
139	5
140	5
141	5
142	5
143	5
144	5
145	5
146	5
147	5
148	5
149	5
150	5
151	5
152	5
153	5
154	5
155	5
156	5
157	5
0	6
1	6
2	6
3	6
4	6
5	6
6	6
7	6	0.590529
8	6
9	6
10	6
11	6
12	6
13	6
14	6
15	6
16	6
17	6
18	6
19	6
20	6
21	6
22	6
23	6
24	6
25	6
26	6
27	6
28	6
29	6
30	6
31	6
32	6
33	6
34	6
35	6
36	6
37	6
38	6
39	6
40	6
41	6
42	6
43	6
44	6
45	6
46	6
47	6
48	6
49	6
50	6
51	6
52	6
53	6
54	6
55	6
56	6
57	6
58	6
59	6
60	6
61	6
62	6
63	6
64	6
65	6
66	6
67	6
68	6
69	6
70	6
71	6
72	6
73	6
74	6
75	6
76	6
77	6
78	6
79	6
80	6
81	6
82	6
83	6
84	6
85	6
86	6
87	6
88	6
89	6
90	6
91	6
92	6
93	6
94	6
95	6
96	6
97	6
98	6
99	6
100	6
101	6
102	6
103	6
104	6
105	6
106	6
107	6
108	6
109	6
110	6
111	6
112	6
113	6
114	6
115	6
116	6
117	6
118	6
119	6
120	6
121	6
122	6
123	6
124	6
125	6
126	6
127	6
128	6
129	6
130	6
131	6
132	6
133	6
134	6
135	6
136	6
137	6
138	6
139	6
140	6
141	6
142	6
143	6
144	6
145	6
146	6
147	6
148	6
149	6
150	6
151	6
152	6
153	6
154	6
155	6
156	6
157	6
0	7
1	7
2	7
3	7
4	7		0.20992
5	7
6	7
7	7		0.218962	0.0110491
8	7
9	7
10	7
11	7
12	7
13	7
14	7
15	7
16	7
17	7
18	7
19	7
20	7
21	7
22	7
23	7
24	7
25	7
26	7
27	7
28	7
29	7
30	7
31	7
32	7
33	7
34	7
35	7
36	7
37	7
38	7
39	7
40	7
41	7
42	7
43	7
44	7
45	7
46	7
47	7			0.0110953
48	7
49	7
50	7
51	7
52	7
53	7
54	7
55	7
56	7
57	7
58	7
59	7
60	7
61	7
62	7
63	7
64	7
65	7
66	7
67	7
68	7
69	7
70	7
71	7
72	7
73	7
74	7
75	7
76	7
77	7
78	7
79	7
80	7
81	7
82	7
83	7
84	7
85	7
86	7
87	7
88	7
89	7
90	7
91	7
92	7
93	7
94	7
95	7
96	7
97	7
98	7
99	7
100	7
101	7
102	7
103	7
104	7
105	7
106	7
107	7
108	7
109	7
110	7
111	7
112	7
113	7
114	7
115	7
116	7
117	7
118	7
119	7
120	7
121	7
122	7
123	7
124	7
125	7
126	7
127	7
128	7
129	7
130	7
131	7
132	7		0.182965
133	7
134	7
135	7
136	7
137	7
138	7
139	7
140	7
141	7
142	7
143	7
144	7
145	7
146	7
147	7
148	7
149	7
150	7
151	7
152	7
153	7
154	7
155	7
156	7
157	7
0	8
1	8
2	8	0.578608	0.251514	0.0126409
3	8		0.183152	0.0117674
4	8	0.665528	0.252032	0.011579
5	8
6	8	0.574524
7	8	0.605355	0.194405
8	8
9	8
10	8
11	8
12	8
13	8
14	8
15	8
16	8
17	8
18	8
19	8
20	8
21	8
22	8
23	8
24	8
25	8
26	8
27	8
28	8
29	8
30	8
31	8
32	8
33	8
34	8
35	8
36	8
37	8
38	8
39	8
40	8
41	8
42	8
43	8
44	8
45	8
46	8
47	8
48	8
49	8
50	8
51	8
52	8
53	8
54	8
55	8
56	8
57	8
58	8
59	8
60	8
61	8
62	8
63	8
64	8
65	8
66	8
67	8
68	8
69	8
70	8
71	8
72	8
73	8
74	8
75	8
76	8
77	8
78	8
79	8
80	8
81	8
82	8
83	8
84	8
85	8
86	8
87	8
88	8
89	8
90	8
91	8
92	8
93	8
94	8
95	8
96	8
97	8
98	8
99	8
100	8
101	8
102	8
103	8
104	8
105	8
106	8
107	8	0.580338
108	8
109	8
110	8
111	8
112	8
113	8
114	8
115	8
116	8
117	8
118	8
119	8
120	8
121	8
122	8
123	8
124	8
125	8
126	8
127	8
128	8
129	8
130	8
131	8
132	8
133	8
134	8
135	8
136	8
137	8
138	8
139	8
140	8
141	8
142	8
143	8
144	8
145	8
146	8
147	8
148	8
149	8
150	8
151	8
152	8
153	8
154	8
155	8
156	8
157	8
0	9
1	9		0.185304
2	9		0.224449
3	9		0.26093	0.0131647
4	9	0.956196	0.248188	0.0125859
5	9	0.982506		0.0116781
6	9
7	9			0.0120776
8	9
9	9
10	9
11	9
12	9
13	9
14	9
15	9
16	9
17	9
18	9
19	9
20	9
21	9
22	9
23	9
24	9
25	9
26	9
27	9
28	9
29	9
30	9
31	9
32	9		0.186374
33	9
34	9
35	9
36	9
37	9
38	9
39	9
40	9
41	9
42	9
43	9
44	9
45	9			0.0110063
46	9
47	9
48	9
49	9
50	9
51	9
52	9
53	9
54	9
55	9
56	9
57	9
58	9
59	9
60	9
61	9
62	9
63	9
64	9
65	9
66	9
67	9
68	9
69	9
70	9
71	9
72	9
73	9
74	9
75	9
76	9
77	9
78	9
79	9
80	9
81	9
82	9
83	9
84	9
85	9
86	9
87	9
88	9
89	9
90	9
91	9
92	9
93	9
94	9
95	9
96	9
97	9
98	9
99	9
100	9
101	9
102	9
103	9
104	9
105	9
106	9
107	9
108	9
109	9
110	9
111	9
112	9
113	9
114	9
115	9
116	9
117	9
118	9
119	9
120	9
121	9
122	9
123	9
124	9
125	9
126	9
127	9
128	9
129	9
130	9
131	9
132	9
133	9
134	9
135	9
136	9
137	9
138	9
139	9
140	9
141	9
142	9	0.580605
143	9
144	9
145	9
146	9
147	9
148	9
149	9
150	9
151	9
152	9
153	9
154	9
155	9
156	9
157	9
0	10
1	10
2	10			0.0110463
3	10	0.598734	0.222999	0.0160339
4	10		0.214654	0.0121906
5	10
6	10
7	10
8	10
9	10
10	10
11	10
12	10
13	10
14	10
15	10
16	10
17	10
18	10
19	10
20	10
21	10
22	10
23	10
24	10
25	10
26	10
27	10
28	10	0.60585
29	10
30	10
31	10
32	10
33	10
34	10
35	10
36	10
37	10
38	10
39	10
40	10
41	10
42	10
43	10
44	10
45	10
46	10
47	10
48	10
49	10
50	10
51	10
52	10
53	10
54	10
55	10
56	10
57	10
58	10
59	10
60	10
61	10
62	10
63	10
64	10
65	10
66	10
67	10
68	10
69	10
70	10
71	10
72	10
73	10
74	10
75	10
76	10
77	10
78	10
79	10
80	10
81	10
82	10
83	10
84	10
85	10
86	10
87	10
88	10
89	10
90	10
91	10
92	10
93	10
94	10
95	10
96	10
97	10
98	10
99	10
100	10
101	10
102	10
103	10
104	10
105	10
106	10
107	10
108	10
109	10
110	10
111	10
112	10
113	10
114	10
115	10
116	10
117	10
118	10
119	10
120	10
121	10
122	10
123	10
124	10
125	10
126	10
127	10
128	10
129	10
130	10
131	10
132	10
133	10
134	10
135	10
136	10
137	10
138	10
139	10
140	10
141	10
142	10
143	10
144	10
145	10
146	10
147	10
148	10
149	10
150	10
151	10
152	10
153	10
154	10
155	10
156	10
157	10
0	11
1	11	0.624725
2	11		0.198642	0.0120848
3	11	0.587608	0.225687	0.016255
4	11			0.0137269
5	11
6	11
7	11
8	11
9	11
10	11
11	11
12	11		0.184201
13	11			0.0120938
14	11
15	11
16	11
17	11
18	11
19	11
20	11
21	11
22	11
23	11
24	11
25	11
26	11
27	11			0.0125741
28	11
29	11
30	11
31	11
32	11
33	11
34	11
35	11
36	11
37	11
38	11
39	11
40	11
41	11
42	11
43	11
44	11		0.199227
45	11
46	11
47	11
48	11
49	11
50	11
51	11
52	11
53	11
54	11
55	11
56	11
57	11
58	11
59	11
60	11
61	11
62	11
63	11
64	11
65	11
66	11
67	11
68	11
69	11
70	11
71	11
72	11
73	11
74	11
75	11
76	11
77	11
78	11
79	11
80	11
81	11
82	11
83	11
84	11
85	11
86	11
87	11
88	11
89	11
90	11
91	11
92	11
93	11
94	11
95	11
96	11
97	11
98	11
99	11
100	11
101	11
102	11
103	11
104	11
105	11
106	11
107	11
108	11
109	11
110	11
111	11
112	11
113	11
114	11
115	11
116	11
117	11
118	11
119	11
120	11
121	11
122	11
123	11
124	11
125	11
126	11
127	11
128	11
129	11
130	11
131	11
132	11
133	11
134	11
135	11
136	11
137	11
138	11
139	11
140	11
141	11
142	11
143	11
144	11
145	11
146	11
147	11
148	11
149	11
150	11
151	11
152	11
153	11
154	11
155	11
156	11
157	11
0	12
1	12
2	12			0.0111624
3	12			0.012165
4	12	0.69173
5	12
6	12
7	12
8	12
9	12
10	12
11	12
12	12
13	12
14	12
15	12
16	12
17	12
18	12
19	12
20	12
21	12
22	12
23	12
24	12
25	12
26	12
27	12
28	12
29	12			0.0117742
30	12
31	12		0.185712
32	12
33	12
34	12
35	12
36	12
37	12
38	12
39	12
40	12
41	12
42	12
43	12
44	12
45	12
46	12
47	12
48	12
49	12
50	12
51	12
52	12
53	12
54	12
55	12
56	12
57	12
58	12
59	12
60	12
61	12
62	12
63	12
64	12
65	12
66	12
67	12
68	12
69	12
70	12
71	12
72	12
73	12
74	12
75	12
76	12
77	12
78	12
79	12
80	12
81	12
82	12
83	12
84	12
85	12
86	12
87	12			0.0112462
88	12
89	12
90	12
91	12
92	12
93	12
94	12
95	12
96	12
97	12
98	12
99	12
100	12
101	12
102	12	0.576853
[truncated: 23,597 more rows]
