# Supplementary material for: Correlating STED and synchrotron XRF nano-imaging unveils cosegregation of metals and cytoskeleton proteins in dendrites
Source: eLife journal article supplement (doi:10.7554/elife.62334), 2020-12-08
Supplement: supp [file Fig S2h P_S_Zn_ngmm2_wobg.xlsx]

## Sheet: Feuil1
X	Y	P	S	Zn
0	0
1	0
2	0
3	0
4	0
5	0
6	0
7	0
8	0
9	0
10	0
11	0
12	0
13	0
14	0
15	0
16	0
17	0
18	0
19	0
20	0
21	0
22	0
23	0
24	0
25	0
26	0
27	0
28	0
29	0
30	0
31	0
32	0
33	0
34	0
35	0
36	0
37	0
38	0
39	0
40	0
41	0
42	0
43	0
44	0
45	0
46	0
47	0
48	0
49	0
0	1
1	1
2	1
3	1
4	1
5	1
6	1
7	1
8	1
9	1
10	1
11	1
12	1
13	1
14	1
15	1
16	1
17	1
18	1
19	1
20	1
21	1
22	1
23	1
24	1
25	1
26	1
27	1
28	1
29	1
30	1
31	1
32	1
33	1
34	1
35	1
36	1
37	1
38	1
39	1
40	1
41	1
42	1
43	1
44	1
45	1
46	1
47	1
48	1
49	1
0	2
1	2
2	2
3	2
4	2
5	2
6	2
7	2
8	2
9	2
10	2
11	2
12	2
13	2
14	2
15	2
16	2
17	2
18	2
19	2
20	2
21	2
22	2
23	2
24	2
25	2
26	2
27	2
28	2
29	2
30	2
31	2
32	2
33	2
34	2
35	2
36	2
37	2
38	2
39	2
40	2
41	2
42	2
43	2
44	2
45	2
46	2
47	2
48	2
49	2
0	3
1	3
2	3
3	3
4	3
5	3
6	3
7	3
8	3
9	3
10	3
11	3
12	3
13	3
14	3
15	3
16	3
17	3
18	3
19	3
20	3
21	3
22	3
23	3
24	3		0.358929	0.00815766
25	3
26	3
27	3
28	3
29	3
30	3
31	3
32	3
33	3
34	3
35	3
36	3
37	3
38	3
39	3
40	3
41	3
42	3
43	3
44	3
45	3
46	3
47	3
48	3
49	3
0	4
1	4
2	4
3	4
4	4
5	4
6	4
7	4
8	4
9	4
10	4
11	4
12	4
13	4
14	4
15	4
16	4
17	4
18	4
19	4
20	4
21	4
22	4
23	4
24	4
25	4
26	4
27	4
28	4
29	4
30	4
31	4
32	4
33	4
34	4
35	4
36	4
37	4
38	4
39	4
40	4
41	4
42	4
43	4
44	4
45	4
46	4
47	4
48	4
49	4
0	5
1	5
2	5
3	5
4	5
5	5
6	5
7	5
8	5
9	5
10	5
11	5
12	5
13	5
14	5
15	5
16	5
17	5
18	5
19	5
20	5
21	5
22	5
23	5
24	5
25	5
26	5
27	5
28	5
29	5		0.381755	0.00862745
30	5
31	5
32	5
33	5
34	5
35	5
36	5
37	5
38	5
39	5
40	5
41	5
42	5
43	5
44	5
45	5
46	5
47	5
48	5
49	5
0	6
1	6
2	6
3	6
4	6
5	6
6	6
7	6
8	6
9	6
10	6
11	6
12	6
13	6
14	6
15	6
16	6
17	6
18	6
19	6
20	6
21	6
22	6
23	6
24	6
25	6
26	6
27	6
28	6
29	6
30	6
31	6
32	6
33	6
34	6
35	6
36	6
37	6
38	6
39	6
40	6
41	6
42	6
43	6
44	6
45	6
46	6
47	6
48	6
49	6
0	7
1	7
2	7
3	7
4	7
5	7
6	7
7	7
8	7
9	7
10	7
11	7
12	7
13	7
14	7
15	7
16	7
17	7
18	7
19	7
20	7
21	7
22	7
23	7
24	7
25	7
26	7
27	7
28	7
29	7
30	7
31	7
32	7
33	7
34	7
35	7
36	7
37	7
38	7
39	7
40	7
41	7
42	7
43	7
44	7
45	7
46	7
47	7
48	7
49	7
0	8
1	8
2	8
3	8
4	8
5	8
6	8
7	8
8	8
9	8
10	8
11	8
12	8
13	8
14	8
15	8
16	8
17	8
18	8
19	8
20	8
21	8
22	8
23	8
24	8
25	8
26	8
27	8
28	8
29	8
30	8
31	8
32	8
33	8
34	8
35	8
36	8
37	8
38	8
39	8
40	8
41	8
42	8
43	8
44	8
45	8
46	8
47	8
48	8
49	8
0	9
1	9
2	9
3	9
4	9
5	9
6	9
7	9
8	9
9	9
10	9
11	9
12	9
13	9
14	9
15	9
16	9
17	9
18	9
19	9
20	9
21	9
22	9
23	9
24	9
25	9
26	9
27	9
28	9
29	9
30	9
31	9
32	9
33	9
34	9
35	9
36	9
37	9
38	9
39	9
40	9
41	9
42	9
43	9
44	9
45	9
46	9
47	9
48	9
49	9
0	10
1	10
2	10
3	10
4	10
5	10
6	10
7	10
8	10
9	10
10	10
11	10
12	10
13	10
14	10
15	10
16	10
17	10
18	10
19	10
20	10
21	10
22	10
23	10
24	10
25	10
26	10
27	10
28	10
29	10
30	10
31	10
32	10
33	10
34	10
35	10
36	10
37	10
38	10
39	10
40	10
41	10
42	10
43	10
44	10
45	10
46	10
47	10
48	10
49	10
0	11
1	11
2	11
3	11
4	11
5	11
6	11
7	11
8	11
9	11
10	11
11	11
12	11
13	11
14	11
15	11
16	11
17	11
18	11
19	11
20	11
21	11
22	11
23	11
24	11
25	11
26	11
27	11
28	11
29	11
30	11
31	11		0.368119	0.0122283
32	11
33	11
34	11
35	11
36	11
37	11
38	11
39	11
40	11
41	11
42	11
43	11
44	11
45	11
46	11
47	11
48	11
49	11
0	12
1	12
2	12
3	12
4	12
5	12
6	12
7	12
8	12
9	12
10	12
11	12
12	12
13	12
14	12
15	12
16	12
17	12
18	12
19	12
20	12
21	12
22	12
23	12
24	12
25	12
26	12
27	12		0.369134	0.00996353
28	12
29	12
30	12
31	12
32	12
33	12
34	12
35	12
36	12
37	12
38	12
39	12
40	12
41	12
42	12
43	12
44	12
45	12
46	12
47	12
48	12
49	12
0	13
1	13
2	13
3	13
4	13
5	13		0.37056	0.00911575
6	13
7	13
8	13
9	13
10	13
11	13
12	13
13	13
14	13
15	13
16	13
17	13
18	13
19	13
20	13
21	13
22	13
23	13
24	13
25	13
26	13
27	13		0.407402	0.00921071
28	13
29	13
30	13
31	13
32	13
33	13
34	13
35	13
36	13
37	13
38	13
39	13
40	13
41	13
42	13
43	13
44	13
45	13
46	13
47	13
48	13
49	13
0	14
1	14
2	14
3	14
4	14
5	14
6	14
7	14
8	14
9	14
10	14
11	14
12	14
13	14
14	14
15	14
16	14
17	14
18	14
19	14
20	14
21	14
22	14
23	14
24	14		0.351377	0.00908705
25	14
26	14	1.38636
27	14
28	14
29	14
30	14
31	14
32	14		0.363375	0.0103809
33	14
34	14
35	14
36	14
37	14
38	14
39	14
40	14
41	14
42	14
43	14
44	14
45	14
46	14
47	14
48	14
49	14
0	15
1	15
2	15
3	15
4	15
5	15
6	15
7	15
8	15
9	15
10	15
11	15
12	15
13	15
14	15
15	15
16	15
17	15
18	15
19	15
20	15
21	15
22	15
23	15		0.382195	0.00999079
24	15
25	15		0.372061	0.0149961
26	15		0.401667	0.0107218
27	15		0.375774	0.0130997
28	15		0.370019	0.0124174
29	15	1.34286	0.477834	0.0142844
30	15	1.38625
31	15
32	15		0.443724	0.0111601
33	15
34	15
35	15
36	15
37	15
38	15
39	15
40	15
41	15
42	15
43	15
44	15
45	15
46	15
47	15
48	15	1.45345	0.34409	0.0122285
49	15
0	16	1.23741
1	16
2	16
3	16
4	16
5	16
6	16
7	16
8	16
9	16
10	16
11	16
12	16		0.394028	0.00921433
13	16
14	16
15	16
16	16
17	16
18	16
19	16
20	16
21	16
22	16		0.359436	0.0119881
23	16		0.355727	0.010341
24	16	1.37513	0.427824	0.0135012
25	16		0.452593	0.0122485
26	16	1.4918	0.572944	0.0114594
27	16	1.57031	0.601712	0.00918477
28	16	1.2779	0.547714	0.0143934
29	16	1.22013	0.496611	0.0132018
30	16	1.33862	0.436607	0.0150217
31	16	1.49962	0.513579	0.0151321
32	16	1.21597
33	16	1.41565	0.518581	0.0132197
34	16		0.48831	0.0142892
35	16	1.23799	0.405597	0.012412
36	16
37	16
38	16
39	16
40	16
41	16
42	16
43	16
44	16
45	16
46	16
47	16	1.35312
48	16
49	16	1.27147
0	17	1.36851
1	17
2	17		0.362658	0.00932236
3	17
4	17
5	17
6	17
7	17
8	17
9	17
10	17
11	17
12	17
13	17
14	17	1.32672
15	17
16	17
17	17
18	17		0.43077	0.00702376
19	17		0.452971	0.0103723
20	17		0.404622	0.0109454
21	17	1.27801	0.389039	0.0162328
22	17		0.47197	0.0133913
23	17		0.427556	0.0139927
24	17		0.5141	0.0134617
25	17	1.2647	0.584315	0.0144364
26	17		0.572251	0.0131033
27	17		0.546255	0.01402
28	17	1.33861	0.733197	0.0147528
29	17	1.22708	0.762014	0.0141665
30	17	1.55608	0.731267	0.0175299
31	17	1.66735	0.533041	0.0150615
32	17	1.29705	0.567414	0.0123478
33	17	1.2081	0.738442	0.0135127
34	17	1.30051	0.589402	0.0133413
35	17	1.25472	0.549733	0.0172694
36	17		0.442267	0.0116963
37	17		0.549724	0.0136797
38	17		0.485145	0.012515
39	17		0.373391	0.0123145
40	17	1.23889
41	17
42	17
43	17
44	17	1.33239
45	17	1.25314
46	17		0.361292	0.0109779
47	17	1.37102
48	17
49	17	1.2843
0	18	1.37084
1	18
2	18
3	18
4	18
5	18
6	18	1.22352
7	18
8	18
9	18
10	18
11	18
12	18
13	18		0.434075	0.0147871
14	18		0.373079	0.00805031
15	18		0.417138	0.00938275
16	18
17	18
18	18		0.369251	0.0124076
19	18		0.354733	0.0127569
20	18		0.350525	0.0135629
21	18		0.43535	0.0101084
22	18	1.26165	0.546544	0.0131213
23	18	1.3167	0.388535	0.0148237
24	18	1.36667	0.594202	0.011421
25	18	1.29639	0.592755	0.0148764
26	18	1.37295	0.61015	0.0153161
27	18	1.41297	0.635656	0.010302
28	18	1.48829	0.72661	0.0185619
29	18		0.608249	0.0137498
30	18	1.78038	0.657636	0.0129952
31	18	1.44786	0.70435	0.017577
32	18	1.61683	0.485097	0.0134429
33	18	1.35833	0.604128	0.016097
34	18	1.72045	0.58137	0.015702
35	18	1.41488	0.786528	0.0183216
36	18	1.2651	0.606596	0.0125523
37	18	1.43829	0.565672	0.0137518
38	18		0.434046	0.013349
39	18	1.33189	0.46113	0.0132771
40	18		0.434307	0.0151172
41	18	1.27566	0.543959	0.0114507
42	18	1.33317
43	18	1.23823	0.521109	0.0157331
44	18	1.31034	0.405392	0.00837897
45	18	1.32091	0.371725	0.0121936
46	18	1.42426
47	18
48	18	1.29532
49	18		0.415239	0.0122551
0	19	1.25078
1	19
2	19
3	19
4	19
5	19		0.361218	0.0090227
6	19
7	19
8	19
9	19
10	19
11	19		0.372082	0.0124869
12	19
13	19		0.460075	0.0116303
14	19	1.3202
15	19	1.34624	0.357201	0.0124761
16	19		0.346885	0.0115035
17	19		0.38097	0.00926259
18	19		0.344322	0.0117242
19	19		0.423816	0.0128018
20	19	1.23645
21	19		0.362548	0.0154383
22	19	1.48459	0.443869	0.0105259
23	19		0.581526	0.0114501
24	19	1.39973	0.640421	0.0132268
25	19		0.825154	0.015346
26	19		0.646811	0.0150371
27	19	1.42738	0.714757	0.0139816
28	19	1.45229	0.706293	0.0133201
29	19	1.598	0.544779	0.0153375
30	19	1.56286	0.839692	0.0126507
31	19	1.59654	0.835859	0.0144326
32	19	1.45725	0.659116	0.0150085
33	19	1.4532	0.671224	0.0130509
34	19	1.8818	0.695676	0.0180936
35	19		0.668719	0.0155222
36	19	1.33898	0.722795	0.0160079
37	19	1.65409	0.565593	0.0149876
38	19	1.58583	0.503653	0.0151406
39	19	1.32435	0.623081	0.0119552
40	19	1.29669	0.625064	0.0142245
41	19	1.28079	0.398921	0.0178427
42	19	1.84166	0.641808	0.0128064
43	19	1.25708	0.451365	0.0161201
44	19	1.55638	0.375734	0.0165772
45	19	1.49799	0.447541	0.0178059
46	19	1.34624
47	19	1.60462	0.497253	0.013134
48	19	1.53782	0.34864	0.0127465
49	19	1.27514	0.396774	0.016374
0	20	1.2328	0.374661	0.0140224
1	20	1.33591	0.452976	0.0100884
2	20	1.40499
3	20
4	20		0.380967	0.0131231
5	20
6	20		0.40789	0.0102955
7	20
8	20
9	20
10	20		0.368306	0.00934726
11	20		0.389744	0.0115682
12	20
13	20
14	20	1.21221
15	20		0.363921	0.0147338
16	20		0.415997	0.0123738
17	20		0.399755	0.0120877
18	20
19	20		0.43847	0.00945365
20	20	1.42107	0.358941	0.0101571
21	20		0.407384	0.0118333
22	20	1.43429	0.676144	0.012486
23	20	1.43222	0.522667	0.0115471
24	20	1.42285	0.59542	0.00982634
25	20		0.831779	0.0163457
26	20	1.96507	0.830715	0.013774
27	20	1.50859	0.671214	0.0119528
28	20	1.50918	0.719139	0.0150376
29	20	2.03541	0.78303	0.0154323
30	20	1.22427	0.953589	0.0142099
31	20	1.63777	0.792461	0.0137188
32	20	1.67927	0.923494	0.0150726
33	20	1.68833	0.797521	0.0177144
34	20	1.86232	0.717565	0.0172079
35	20	1.79399	0.877212	0.0125624
36	20	1.94368	0.745939	0.0178325
37	20	1.33458	0.662753	0.0145213
38	20	1.53817	0.747436	0.0194868
39	20	1.75176	0.743466	0.0167104
40	20	1.69599	0.609693	0.01658
41	20	1.92199	0.661469	0.0189899
42	20	1.69088	0.844826	0.0195075
43	20	1.64475	0.580857	0.0157149
44	20	1.55165	0.668083	0.0211737
45	20	2.06465	0.573055	0.0191016
46	20	1.37906	0.526403	0.0178254
47	20	1.62254	0.567332	0.015985
48	20	1.55389	0.473624	0.0150855
49	20	1.73897	0.397286	0.0160617
0	21	1.49829	0.38521	0.0143761
1	21		0.341702	0.0150417
2	21
3	21	1.2237	0.361979	0.00880118
4	21
5	21
6	21	1.23074
7	21
8	21
9	21
10	21		0.410636	0.012688
11	21	1.31184	0.433679	0.014472
12	21		0.43721	0.00942931
13	21		0.50989	0.0141187
14	21		0.351304	0.0106801
15	21		0.400426	0.0132622
16	21	1.2189
17	21		0.40373	0.012733
18	21		0.355978	0.0115327
19	21		0.412741	0.0129613
20	21	1.28527	0.463728	0.0115926
21	21	1.35606	0.45838	0.0153937
22	21	1.47865	0.563604	0.0130792
23	21	1.44777	0.825318	0.0136309
24	21	1.70903	0.576837	0.0166849
25	21	1.51464	0.715558	0.0131146
26	21	1.63104	0.806259	0.0165009
27	21	1.56277	0.765136	0.017296
28	21	1.6395	0.966454	0.0121267
29	21	1.45122	0.828372	0.0163266
30	21	2.01611	0.960344	0.0219828
31	21	1.74204	1.13758	0.0150291
32	21	1.73543	0.972175	0.0179729
33	21	1.70266	1.09976	0.0168957
34	21	1.9467	0.976902	0.0183012
35	21	1.74279	0.896525	0.018175
36	21	1.55665	0.879897	0.0222976
37	21	1.76885	0.85388	0.0169998
38	21	1.80448	0.893737	0.0236938
39	21	1.63348	0.728297	0.0201003
40	21	1.58768	0.898035	0.0165159
41	21	1.72952	0.938652	0.0222019
42	21	1.49968	0.963476	0.0207011
43	21	1.87232	0.879754	0.0245096
44	21	1.50205	0.880573	0.0219227
45	21	1.31093	0.787845	0.0233206
46	21	1.43944	0.851768	0.0206285
47	21	1.65389	0.683472	0.0205271
48	21	1.82757	0.607288	0.0161018
49	21	1.51352	0.632654	0.0138423
0	22	1.5339	0.450722	0.018393
1	22	1.36102	0.364376	0.0102606
2	22	1.22621
3	22		0.377308	0.0148328
4	22
5	22	1.22246	0.355262	0.01103
6	22
7	22
8	22
9	22
10	22	1.21659	0.455336	0.00881027
11	22	1.31815
12	22		0.462887	0.00985961
13	22		0.357895	0.0125892
14	22	1.33104	0.355776	0.0132746
15	22
16	22	1.30683	0.457983	0.0146562
17	22
18	22	1.2676	0.412885	0.0132549
19	22		0.385534	0.0150373
20	22		0.50653	0.0124957
21	22		0.59979	0.00963835
22	22	1.2004	0.542213	0.0134471
23	22	1.44185	0.614628	0.0141534
24	22	1.61204	0.739881	0.0155786
25	22	1.70256	0.730919	0.0169682
26	22	1.3309	0.711989	0.0181569
27	22	1.45398	0.835866	0.016001
28	22	2.00257	1.02044	0.0189957
29	22	1.8724	0.782799	0.0231258
30	22	1.81679	1.03514	0.0189419
31	22	1.91169	0.895078	0.0191094
32	22	2.14862	1.14456	0.0187302
33	22	1.94485	1.26163	0.0201293
34	22	2.21443	0.979074	0.0219009
35	22	2.17138	0.931048	0.016642
36	22	2.0869	1.13125	0.0198217
37	22	1.67274	1.15148	0.0198595
38	22	2.00103	1.12355	0.0247762
39	22	1.763	1.15982	0.023126
40	22	1.83409	0.785384	0.025129
41	22	1.70721	1.06253	0.0196234
42	22	1.80285	0.918276	0.0249545
43	22	1.85732	1.15279	0.0262936
44	22	1.85921	1.22845	0.028866
45	22	1.68145	1.07922	0.0231519
46	22	1.89786	0.923273	0.0221211
47	22	1.87645	0.785945	0.0254983
48	22	2.37089	0.71126	0.016678
49	22	2.04578	0.722412	0.0219447
0	23	1.20341	0.360548	0.0109319
1	23		0.462774	0.0127838
2	23
3	23	1.24868	0.436463	0.00935274
4	23		0.36341	0.0105299
5	23		0.47767	0.0101767
6	23
7	23
8	23		0.427989	0.0102285
9	23	1.26351
10	23		0.449518	0.0150298
11	23
12	23	1.27108	0.476105	0.012981
13	23	1.29019	0.416638	0.0139467
14	23		0.402232	0.012833
15	23		0.405856	0.0109622
16	23	1.24821
17	23	1.23542	0.372369	0.0120838
18	23		0.389398	0.0116458
19	23
20	23	1.38353	0.443045	0.0113227
21	23		0.548031	0.0137704
22	23	1.54406	0.489171	0.014384
23	23	1.41186	0.849391	0.0151117
24	23	1.68052	0.639354	0.0155607
25	23	1.93384	0.778574	0.0172945
26	23	1.49524	1.08321	0.0192242
27	23	1.85781	0.775346	0.0200648
28	23	1.33598	0.919104	0.0172456
29	23	1.58369	1.02578	0.0197491
30	23	1.72519	1.13939	0.0190576
31	23	2.00131	1.18408	0.0216927
32	23	1.71287	1.24995	0.0182724
33	23	2.17116	1.15246	0.020927
34	23	2.05541	1.21238	0.0216342
35	23	2.03575	1.27549	0.0213822
36	23	1.5249	1.18319	0.0203188
37	23	2.03901	0.938116	0.0238654
38	23	2.10894	1.29765	0.0251669
39	23	2.12128	1.33694	0.0355726
40	23	1.68755	0.985603	0.025566
41	23	1.67243	1.25495	0.0235878
42	23	1.74788	1.37607	0.0240253
43	23	1.55035	1.11997	0.0284009
44	23	1.70959	1.20358	0.0271272
45	23	2.25957	1.087	0.0332829
46	23	1.81117	1.13927	0.0232537
47	23	1.84266	0.86986	0.0235608
48	23	2.05056	0.731462	0.0228464
49	23	2.36789	0.62457	0.0230232
0	24		0.482739	0.0125362
1	24		0.499006	0.0144876
2	24	1.25143	0.358292	0.0149617
3	24		0.409702	0.0101639
4	24
5	24		0.359423	0.00849729
6	24
7	24		0.359169	0.010376
8	24
9	24		0.410712	0.0081425
10	24
11	24
12	24		0.401174	0.0120374
13	24
14	24	1.26522	0.503026	0.0124015
15	24	1.3341	0.413074	0.0121845
16	24
17	24	1.21584	0.416777	0.0116508
18	24		0.480369	0.0141954
19	24		0.355094	0.0116557
20	24		0.47982	0.0132409
21	24	1.701	0.452959	0.0078615
22	24	1.22517	0.562983	0.0159964
23	24	1.6372	0.678209	0.0155347
24	24	1.5167	0.658504	0.0179309
25	24	1.52382	0.779494	0.0160298
26	24	1.63251	1.04371	0.0193081
27	24	1.8289	1.01384	0.017456
28	24	1.42664	0.738572	0.0114454
29	24	1.76659	1.17218	0.0158635
30	24	1.97453	0.992614	0.019634
31	24	1.41409	1.13977	0.0183501
32	24	1.76696	1.24323	0.0233208
33	24	1.54593	1.17148	0.0201398
34	24	2.08056	1.22423	0.0185145
35	24	2.24461	1.27027	0.0251801
36	24	2.0677	1.21309	0.0224309
37	24	1.96725	1.22226	0.026543
38	24	1.89321	1.17265	0.0279473
39	24	2.20923	1.3484	0.023222
40	24	1.94811	1.42417	0.0237224
41	24	1.79117	1.4123	0.0247003
42	24	1.94015	1.18086	0.0315347
43	24	1.80711	1.17901	0.0243928
44	24	1.78338	1.12949	0.0260008
45	24	1.78051	1.06632	0.0263396
46	24	2.13447	1.11452	0.0266756
47	24	2.13526	0.889136	0.02394
48	24	2.07681	0.909463	0.0207355
49	24	2.14495	0.85791	0.0178703
0	25	1.27545	0.431117	0.0116753
1	25
2	25		0.417126	0.00987545
3	25	1.34676	0.377701	0.0103976
4	25
5	25		0.38388	0.0142116
6	25
7	25
8	25		0.452314	0.0122464
9	25		0.349537	0.00904457
10	25
11	25		0.392894	0.0131577
12	25
13	25		0.387132	0.00895473
14	25
15	25
16	25
17	25		0.391741	0.00609158
18	25		0.379865	0.0136016
19	25		0.352066	0.0112967
20	25	1.34024
21	25		0.473814	0.0127381
22	25	1.49076	0.541124	0.00974928
23	25	1.76387	0.653845	0.0147448
24	25	1.59353	0.737235	0.01462
25	25	1.88383	1.02519	0.0156678
26	25	1.91883	0.844862	0.0163478
27	25	1.75923	0.771289	0.0163576
28	25	1.6021	1.19049	0.017414
29	25	1.90429	0.887222	0.01695
30	25	1.56083	1.06997	0.0186657
31	25	1.63666	1.41418	0.0193613
32	25	1.96209	1.28869	0.020704
33	25	1.98522	1.41918	0.0251104
34	25	2.12782	1.45048	0.0254678
35	25	1.8236	1.42188	0.0245146
36	25	2.06215	1.45808	0.0235569
37	25	1.86736	1.49359	0.0289162
38	25	1.5596	1.17425	0.0290688
39	25	1.71991	1.31653	0.0272624
40	25	1.71437	1.18842	0.021941
41	25	1.72254	1.4812	0.0277675
42	25	1.5696	1.18554	0.0335534
43	25	1.93675	1.42443	0.0281459
44	25	1.93544	1.2116	0.0268552
45	25	1.85732	1.02661	0.022997
46	25	2.23027	0.905257	0.0254113
47	25	2.24354	0.954443	0.021715
48	25	2.04222	0.948844	0.0229253
49	25	1.9649	0.673365	0.0209263
0	26	1.52006
1	26		0.437922	0.0118639
2	26	1.24856	0.415145	0.0105138
3	26	1.25204	0.409676	0.0106718
4	26		0.407669	0.00999872
5	26
6	26
7	26
8	26
9	26
10	26		0.394722	0.0122096
11	26		0.438068	0.0104321
12	26	1.24941	0.353022	0.00860227
13	26
14	26
15	26		0.390722	0.0109788
16	26
17	26
18	26
19	26		0.357131	0.0126481
20	26		0.420158	0.0106094
21	26	1.27554	0.458519	0.0130252
22	26	1.26004	0.427731	0.00930435
23	26	1.3853	0.663798	0.0124625
24	26	1.41312	0.762025	0.016042
25	26	1.53904	0.800615	0.0149537
26	26	1.25261	0.961116	0.012793
27	26	1.47335	0.801408	0.0197225
28	26	1.95726	1.07237	0.0192397
29	26	1.94867	1.24416	0.016985
30	26	1.91338	1.05535	0.0174152
31	26	1.83169	1.14928	0.0231714
32	26	2.30687	1.45939	0.0202668
33	26	2.33142	1.49982	0.020928
34	26	1.85843	1.36396	0.0186504
35	26	2.00626	1.45084	0.026772
36	26	2.02614	1.52643	0.0331519
37	26	1.70391	1.55001	0.0310998
38	26	1.62424	1.89895	0.0315648
39	26	1.73006	1.43355	0.0284717
40	26	2.1418	1.51269	0.0307813
41	26	1.77013	1.50849	0.0350611
42	26	1.61477	1.66523	0.0323288
43	26	1.78118	1.29673	0.028458
44	26	1.83741	1.59453	0.0306388
45	26	1.74098	1.30614	0.0253667
46	26	2.02189	1.31885	0.0281622
47	26	2.57652	1.23373	0.0240567
48	26	2.05109	1.02412	0.018345
49	26	2.4971	0.775545	0.0212348
0	27	1.286
1	27		0.441949	0.00813624
2	27	1.52031	0.577489	0.0118663
3	27		0.367358	0.0106794
4	27	1.30768	0.405496	0.0112508
5	27
6	27
7	27
8	27		0.417873	0.00923715
9	27		0.341367	0.00746154
10	27		0.433205	0.00987723
11	27		0.346365	0.0131873
12	27
13	27
14	27
15	27
16	27		0.360577	0.0133175
17	27
18	27
19	27
20	27
21	27		0.345191	0.0101699
22	27	1.23764	0.383494	0.0163901
23	27		0.541342	0.0144169
24	27		0.79581	0.0134223
25	27	1.58875	0.873937	0.0141396
26	27	1.36746	0.947649	0.0166536
27	27	1.6731	0.869089	0.0165601
28	27	1.58137	0.930183	0.017183
29	27	2.00204	1.06308	0.0190239
30	27	1.91058	1.14487	0.0194915
31	27	1.98952	1.38546	0.0202527
32	27	2.06213	1.37652	0.024995
33	27	1.9266	1.18988	0.0241405
34	27	2.03334	1.54781	0.0245104
35	27	2.11184	1.57475	0.0323057
36	27	1.93331	1.69407	0.0285988
37	27	1.62872	1.54769	0.0286044
38	27	1.76864	1.47085	0.0316604
39	27	1.95713	1.77929	0.0245958
40	27	1.76813	1.75569	0.0306941
41	27	1.97467	1.64957	0.0317479
42	27	1.98557	1.68208	0.0328799
43	27	1.71029	1.68373	0.0310092
44	27	1.81769	1.69106	0.0365402
45	27	1.67907	1.53817	0.028643
46	27	1.65956	1.22479	0.0337506
47	27	2.09372	1.29771	0.032595
48	27	2.51871	1.228	0.0250434
49	27	2.29287	0.775584	0.0289997
0	28		0.380614	0.00866574
1	28	1.20426	0.473846	0.00980617
2	28
3	28		0.409055	0.0110737
4	28	1.29142	0.394761	0.00813015
5	28
6	28
7	28		0.350653	0.00935547
8	28
9	28
10	28
11	28		0.346315	0.0149221
12	28
13	28
14	28
15	28
16	28
17	28		0.353976	0.00814488
18	28		0.347843	0.0091172
19	28
20	28
21	28		0.489658	0.0121643
22	28	1.20583	0.490358	0.00964943
23	28	1.54368	0.547268	0.0132859
24	28	1.49023	0.617755	0.0138399
25	28	1.70174	0.72653	0.0125359
26	28	2.03782	0.841696	0.0153636
27	28	1.91132	0.964282	0.0231476
28	28	1.97363	1.0445	0.0189165
29	28	1.94562	1.10716	0.0225615
30	28	1.62302	1.09269	0.016081
31	28	1.99995	1.45089	0.0224089
32	28	2.23356	1.33063	0.0192548
33	28	2.41489	1.2185	0.0202646
34	28	2.21096	1.56374	0.0252645
35	28	1.77214	1.49972	0.0265484
36	28	1.76523	1.54323	0.025996
37	28	1.72635	1.80673	0.0285033
38	28	1.66185	1.57982	0.026501
39	28	1.59413	1.95463	0.0357278
40	28	1.86004	1.65083	0.0339041
41	28	1.5232	1.59873	0.0295209
42	28	1.7268	1.71665	0.0337889
43	28	1.99249	1.71727	0.0304957
44	28	1.6581	1.77653	0.0321436
45	28	2.248	1.43446	0.0303769
46	28	2.1604	1.44265	0.02921
47	28	2.19509	1.49646	0.0343455
48	28	2.36966	0.993157	0.0267026
49	28	2.26366	0.999714	0.0277287
0	29	1.26437	0.395735	0.00981663
1	29		0.369878	0.0126741
2	29		0.436295	0.00884362
3	29		0.489671	0.00999569
4	29		0.39542	0.00947579
5	29
6	29
7	29
8	29
9	29
10	29
11	29
12	29
13	29
14	29
15	29
16	29		0.471512	0.0115257
17	29		0.384246	0.00817382
18	29
19	29
20	29
21	29		0.407192	0.010685
22	29	1.26068	0.559201	0.0122517
23	29	1.23143	0.36368	0.0131811
24	29	1.60377	0.57972	0.0134077
25	29	1.80951	0.646559	0.0142247
26	29	1.46035	0.816147	0.0176732
27	29	1.88549	0.894373	0.0184977
28	29	1.63692	0.988596	0.0201984
29	29	1.80338	0.899799	0.0210263
30	29	1.66007	1.14427	0.0226984
31	29	2.19921	1.32757	0.0264347
32	29	1.75927	1.30871	0.0190592
33	29	1.5769	1.48879	0.026135
34	29	2.27897	1.18974	0.0277496
35	29	1.32896	1.69432	0.0297327
36	29	1.85705	1.76631	0.0310545
37	29	1.56372	1.43441	0.0290609
38	29	2.09456	1.57226	0.0345346
39	29	2.02697	1.64303	0.0358097
40	29	1.45584	1.79038	0.0344639
41	29	1.6336	2.05879	0.0320167
42	29	1.77406	1.57225	0.0328652
43	29	1.69417	1.67072	0.0317867
44	29	2.00598	1.7274	0.0322981
45	29	2.11023	1.41739	0.030566
46	29	1.85935	1.39133	0.02873
47	29	1.9938	1.20459	0.0313307
48	29	2.46359	1.13728	0.0285219
49	29	2.11438	0.894888	0.0306382
0	30	1.37224	0.431021	0.012868
1	30	1.31042	0.484384	0.0126485
2	30	1.38318	0.489725	0.00999811
3	30	1.39327
4	30		0.424382	0.0136642
5	30		0.389834	0.012418
6	30
7	30		0.410368	0.0132189
8	30
9	30
10	30		0.344945	0.0109497
11	30		0.347271	0.00952694
12	30
13	30
14	30
15	30
16	30		0.369451	0.0113543
17	30
18	30
19	30
20	30		0.358809	0.00854815
21	30	1.30482
22	30		0.407575	0.010322
23	30	1.35397	0.443819	0.0126618
24	30	1.30287	0.51161	0.0136184
25	30	1.64659	0.803537	0.0109688
26	30	1.65138	0.743351	0.0224347
27	30	1.36823	0.815375	0.0168789
28	30	1.57068	0.772532	0.0199936
29	30	1.48616	0.920219	0.0212687
30	30	1.83878	1.16237	0.0212379
31	30	1.65127	1.05554	0.0263598
32	30	2.26373	1.53646	0.0266936
33	30	1.67271	1.32197	0.027255
34	30	1.44896	1.67983	0.0300151
35	30	1.92622	1.67415	0.028376
36	30	1.81351	1.53074	0.0268828
37	30	1.88643	1.70836	0.0340331
38	30	1.62112	1.85266	0.0353419
39	30	1.67017	1.92814	0.0307703
40	30	1.63291	2.0139	0.034794
41	30	1.68417	1.66686	0.0347689
42	30	1.81125	1.98044	0.0333833
43	30	2.13421	1.5942	0.0312237
44	30	1.97465	1.4271	0.0339934
45	30	1.78881	1.68632	0.0331336
46	30	2.51171	1.65922	0.035335
47	30	2.34801	1.27488	0.0273722
48	30	2.4856	1.24897	0.0282471
49	30	1.98247	1.10395	0.0234146
0	31	1.24126	0.420868	0.0150497
1	31	1.33012	0.437611	0.0137439
2	31	1.21728	0.457955	0.0118275
3	31	1.40873	0.48065	0.0118971
4	31	1.42796	0.501353	0.013124
5	31	1.49189	0.407437	0.012463
6	31	1.50174	0.379865	0.0153514
7	31
8	31
9	31		0.411395	0.0104669
10	31
11	31		0.355827	0.00926365
12	31
13	31
14	31
15	31	1.33652	0.350542	0.0106945
16	31
17	31
18	31		0.361632	0.012375
19	31
20	31
21	31		0.383745	0.00734834
22	31
23	31	1.35033	0.46212	0.0118831
24	31	1.44489	0.510231	0.0169284
25	31	2.17523	0.487804	0.0163326
26	31	1.34371	0.842371	0.0170084
27	31	1.92418	0.909167	0.0153134
28	31	1.83637	0.998937	0.0179768
29	31	2.01375	0.983487	0.021593
30	31	1.7789	0.95324	0.0230364
31	31	1.81101	1.14577	0.0218007
32	31	1.88322	1.25429	0.0267469
33	31	2.22584	1.47193	0.0285062
34	31	1.79017	1.46965	0.0307572
35	31	1.85888	1.95365	0.0260753
36	31	1.37448	1.568	0.0304595
37	31	1.69256	1.5895	0.0386135
38	31	1.45478	1.6103	0.0349208
39	31	1.35308	1.97222	0.0361311
40	31	1.4442	1.6292	0.0283317
41	31	1.73686	1.66467	0.0318129
42	31	1.85646	1.70373	0.0313994
43	31	1.94142	1.68212	0.0301568
44	31	2.14113	1.3911	0.0321502
45	31	2.46011	1.64755	0.0310375
46	31	2.38872	1.34171	0.02548
47	31	2.88082	1.20522	0.0276654
48	31	2.07736	1.12564	0.0275356
49	31	2.11276	0.823357	0.0220366
0	32		0.360991	0.0144291
1	32	1.41573	0.547982	0.013212
2	32	1.30665	0.410816	0.0115713
3	32	1.30153	0.597005	0.0121272
4	32	1.23748
5	32	1.40663	0.402678	0.0125908
6	32	1.22784	0.42385	0.00929731
7	32	1.38251	0.349269	0.0168884
8	32		0.412993	0.010511
9	32	1.23066	0.374512	0.0136448
10	32	1.20974
11	32
12	32
13	32
14	32
15	32
16	32	1.39684
17	32
18	32
19	32
20	32
21	32		0.362534	0.00870492
22	32
23	32	1.2336	0.348955	0.0101983
24	32	1.30969	0.491741	0.011161
25	32	1.38375	0.574025	0.0116657
26	32	1.8513	0.615536	0.0150639
27	32	1.68516	0.762455	0.0214832
28	32	1.66501	0.920616	0.0196702
29	32	1.79919	0.995701	0.0203114
30	32	1.8592	0.9983	0.0274034
31	32	2.14436	1.10942	0.0258245
32	32	1.91768	1.68871	0.0314547
33	32	2.03368	1.65446	0.0311491
34	32	1.72149	1.63657	0.0268837
35	32	1.67312	1.58034	0.0287948
36	32	1.7338	1.70557	0.0325654
37	32	1.61186	1.76631	0.034312
38	32	1.23302	1.64433	0.036604
39	32	1.78653	1.61733	0.0265678
40	32	1.5134	1.59142	0.0318452
41	32	1.59075	1.68232	0.0314213
42	32	1.6578	1.73145	0.0355754
43	32	2.36254	1.47717	0.03134
44	32	2.30065	1.28483	0.0275891
45	32	2.42965	1.42207	0.0291724
46	32	1.95604	1.40584	0.0245271
47	32	2.3885	1.13038	0.025418
48	32	2.35804	1.05994	0.0220296
49	32	1.91473	0.931623	0.0199106
0	33	1.483	0.664397	0.0145659
1	33	1.26503	0.509952	0.0139249
2	33	1.36621	0.516682	0.0125987
3	33	1.57605	0.518993	0.0128118
4	33	1.60234	0.410398	0.0123229
5	33	1.52985	0.462059	0.0114939
6	33	1.41322	0.386423	0.0135235
7	33	1.47602
8	33	1.2824
9	33	1.73019
10	33	1.55139	0.400699	0.0104737
11	33		0.369531	0.00937884
12	33	1.21584
13	33
14	33
15	33		0.369	0.0132464
16	33
17	33	1.32924
18	33
19	33
20	33		0.401072	0.0106457
21	33
22	33
23	33	1.29416	0.381287	0.0113735
24	33	1.25137	0.391871	0.0147439
25	33	1.56634	0.640135	0.0113295
26	33	1.747	0.716614	0.014527
27	33	1.73206	0.815665	0.0176578
28	33	1.83691	1.08324	0.0203187
29	33	1.66998	1.12974	0.0233903
30	33	1.67868	1.1217	0.0220698
31	33	1.82988	1.22916	0.0218368
32	33	1.80027	1.54048	0.0318268
33	33	2.07379	1.3513	0.0297669
34	33	1.80355	1.70081	0.0338646
35	33	1.5749	1.52019	0.0312031
36	33	1.64022	1.40726	0.0298454
37	33	1.5911	1.64142	0.0297314
38	33	1.63871	1.82049	0.0327644
39	33	1.50459	2.02169	0.0321718
40	33	1.36125	1.66915	0.0357937
41	33	1.6971	1.52137	0.0284299
42	33	1.66644	1.50863	0.0317413
43	33	1.57369	1.27478	0.0315869
44	33	1.68428	1.46046	0.0331846
45	33	1.59159	1.40474	0.0235469
46	33	1.96598	1.27457	0.0224828
47	33	1.87531	1.03518	0.0245058
48	33	2.01594	0.805981	0.020916
49	33	1.75476	0.772117	0.0150094
0	34	1.35519	0.571349	0.0174471
1	34	1.65008	0.599825	0.016802
2	34	1.59089	0.716331	0.0125589
3	34	1.50095	0.498835	0.015358
4	34	1.90831	0.667209	0.013927
5	34	1.63473	0.635769	0.017105
6	34	1.70307	0.472783	0.015049
7	34	1.77162	0.484092	0.017631
8	34	1.48779
9	34	1.92805	0.487611	0.0121619
10	34	1.28213	0.386863	0.0152853
11	34	1.51387
12	34	1.53824	0.372821	0.014193
13	34		0.344844	0.0135126
14	34		0.365792	0.0151407
15	34		0.342443	0.0129917
16	34	1.35764
17	34
18	34	1.27437
19	34		0.387733	0.0106868
20	34
21	34		0.348163	0.0106336
22	34		0.362297	0.0118622
23	34	1.20816	0.405815	0.011469
24	34	1.5385	0.488048	0.0144641
25	34	1.30847	0.74034	0.0154861
26	34	1.67993	0.709262	0.0171111
27	34	1.79876	0.955198	0.017711
28	34	1.91095	0.925385	0.0240869
29	34	1.5813	1.03561	0.0285476
30	34	1.79353	1.23834	0.0268836
31	34	1.67935	1.56196	0.0263428
32	34	1.93084	1.31138	0.0354661
33	34	1.66661	1.5522	0.0344059
34	34	1.99753	1.4897	0.0311706
35	34	1.84878	1.55491	0.0300438
36	34	1.82568	1.64888	0.0315031
37	34	1.89082	1.89769	0.0231972
38	34	1.72543	1.74805	0.030759
39	34	1.65794	1.49234	0.0324028
40	34	1.30973	1.64704	0.027705
41	34	1.50695	1.37671	0.0297513
42	34	1.74315	1.40421	0.0234972
43	34	1.52687	1.04328	0.0223623
44	34	1.57604	1.16848	0.0243073
45	34	1.55065	1.25898	0.0261088
46	34	1.68897	0.924748	0.0260652
47	34	1.96815	0.663765	0.0231982
48	34	1.83749	0.73528	0.0196246
49	34	1.25732	0.862651	0.0204604
0	35	1.83212	0.615479	0.0161107
1	35	1.99396	0.647899	0.0156756
2	35	1.40018	0.634263	0.0162837
3	35	1.4897	0.555052	0.0154135
4	35	1.40831	0.776357	0.0137274
5	35	1.7708	0.573038	0.0121487
6	35	1.52543	0.497741	0.0133008
7	35	1.55852	0.523294	0.0190044
8	35	1.48752	0.398091	0.0141762
9	35	1.56502	0.521268	0.0125357
10	35	1.37468	0.452308	0.013991
11	35	1.82003	0.357468	0.0157016
12	35	1.58934	0.403522	0.012068
13	35	1.77175	0.511653	0.016793
14	35	1.22627	0.459086	0.01238
15	35	1.63982	0.371692	0.0153667
16	35	1.4472	0.393279	0.0139354
17	35	1.51041	0.487587	0.0117801
18	35	1.56615	0.447915	0.0146325
19	35	1.51674	0.401397	0.0121481
20	35	1.43141	0.453042	0.0104702
21	35	1.74201	0.362328	0.0122422
22	35	1.24648	0.487501	0.0140753
23	35	1.27145	0.526834	0.0170164
24	35	1.50806	0.683309	0.0166501
25	35	1.85387	0.5797	0.0175022
26	35	1.80255	0.871207	0.0174736
27	35	1.69543	1.06448	0.0238894
28	35	1.29527	1.09579	0.0245993
29	35	1.66863	1.05924	0.0222502
30	35	1.93403	1.2495	0.0203713
31	35	1.49515	1.40129	0.0265844
32	35	1.58905	1.50998	0.0322921
33	35	1.76916	1.58562	0.0309304
34	35	1.49403	1.67758	0.0301521
35	35	1.85372	1.44034	0.0336623
36	35	1.5899	1.65128	0.0356298
37	35	1.48909	1.90986	0.0284764
38	35	1.67442	1.32161	0.0304986
39	35	1.70551	1.6418	0.0336976
40	35	1.29207	1.95634	0.0295292
41	35	1.54756	1.26003	0.0266682
42	35	2.01612	1.36656	0.0269027
43	35	1.45916	1.3622	0.0236041
44	35	1.58433	1.08855	0.0247869
45	35	1.49837	1.13685	0.0228058
46	35	1.63825	0.952706	0.0271341
47	35	1.40382	0.883929	0.0214907
48	35	1.59245	0.901634	0.0201354
49	35	1.52679	0.503385	0.0164133
0	36	1.62819	0.729975	0.0131467
1	36	1.91106	0.669781	0.0161628
2	36	1.39864	0.561767	0.0159436
3	36	1.33851	0.565126	0.0150566
4	36	1.6945	0.627335	0.0146089
5	36	1.27083	0.526066	0.0147823
6	36	1.41772	0.527871	0.0143669
7	36	1.52414	0.546289	0.00968016
8	36	1.66276	0.490108	0.0147689
9	36	1.28006	0.458977	0.0144941
10	36	1.65152	0.525219	0.0115313
11	36	1.33448	0.504425	0.0140253
12	36		0.452172	0.010963
13	36	1.35139	0.462744	0.0154203
14	36	2.08173	0.428315	0.0127523
15	36	1.39129	0.487239	0.0145862
16	36	1.89351	0.490332	0.0123509
17	36	1.48317	0.496229	0.019438
18	36	1.58477	0.732131	0.0150217
19	36	1.81505	0.475643	0.0132487
20	36	1.49696	0.537835	0.0146512
21	36	1.97177	0.581043	0.0128403
22	36	1.94167	0.570901	0.0195842
23	36	2.17749	0.751874	0.0149916
24	36	1.95104	0.719296	0.01957
25	36	1.84764	0.765826	0.0208503
26	36	1.74124	0.926607	0.0189422
27	36	1.77375	0.930427	0.0254488
28	36	1.80591	1.18552	0.0264507
29	36	1.88454	1.22714	0.0255029
30	36	1.51793	1.38557	0.0250379
31	36	1.55385	1.42162	0.029411
32	36	1.7656	1.52048	0.0294344
33	36	1.63662	1.44774	0.0261415
34	36	1.70822	1.73966	0.0276429
35	36	1.38848	1.92564	0.0292365
36	36	1.48506	1.9882	0.0319801
37	36	1.74508	1.8467	0.0276183
38	36	1.37616	1.78163	0.0266691
39	36	1.48783	1.30012	0.0358862
40	36	1.49555	1.24437	0.0254814
41	36	1.96925	1.48817	0.0261892
42	36	1.50774	1.35104	0.0236824
43	36	1.35305	1.02566	0.0205053
44	36	1.20764	1.11346	0.0246276
45	36	1.67297	0.874151	0.0207203
46	36	1.73779	0.994116	0.021853
47	36	1.62841	0.633288	0.0182504
48	36	1.48771	0.633269	0.0151548
49	36	1.45137	0.678211	0.013204
0	37	1.28023	0.688777	0.0166665
1	37	1.50886	0.559303	0.0172272
2	37	1.71959	0.596786	0.00949491
3	37	1.9032	0.598647	0.0151579
4	37	1.25708	0.526129	0.0153632
5	37	1.35819	0.609344	0.0159873
6	37	1.61634	0.561894	0.0148814
7	37	1.80567	0.577119	0.0121569
8	37	1.88379	0.468253	0.0150379
9	37	1.45727	0.529132	0.0155422
10	37	1.30827	0.357397	0.0127598
11	37	1.41248	0.411709	0.0116495
12	37	1.35	0.470143	0.0153121
13	37	1.20124	0.430844	0.014376
14	37	1.43642	0.485096	0.0129914
15	37	1.42934	0.50161	0.0157511
16	37	1.3218	0.482696	0.0185785
17	37	1.38121	0.551258	0.0242787
18	37		0.743581	0.0215982
19	37	1.84946	0.562238	0.0194628
20	37	2.21826	0.657121	0.0192681
21	37	1.71346	0.644852	0.0193179
22	37	2.19957	0.5695	0.0170526
23	37	2.25792	0.615652	0.0211583
24	37	1.8737	0.83826	0.0173223
25	37	2.0169	0.899466	0.0204172
26	37	2.05129	0.881966	0.0234847
27	37	1.93086	1.2916	0.0245831
28	37	1.7152	0.899452	0.0248763
29	37	1.69661	1.09913	0.0271447
30	37	1.44879	1.20483	0.0265041
31	37	1.7608	1.50551	0.0321655
32	37	1.70102	1.45662	0.0260804
33	37	1.4927	1.46338	0.0388991
34	37	1.54718	1.72591	0.0312881
35	37	1.4179	1.88764	0.0291864
36	37	1.37515	1.67844	0.0322993
37	37	1.82806	1.52604	0.0319773
38	37	1.56459	1.45326	0.0321672
39	37	1.54339	1.37266	0.0218165
40	37	1.6193	1.40832	0.024041
41	37	1.66361	1.22534	0.0255556
42	37	1.55249	1.10388	0.0179133
43	37	1.45648	1.08564	0.0209467
44	37		1.1163	0.0223272
45	37	1.43774	0.850733	0.0190637
46	37	1.44573	0.83736	0.018459
47	37	1.73371	0.771698	0.0221573
48	37	1.7411	0.552455	0.0147801
49	37	1.30374	0.569249	0.0125339
0	38	1.38051	0.756912	0.0161067
1	38	1.65315	0.729645	0.0210639
2	38	1.38948	0.806754	0.0136821
3	38	1.38418	0.607427	0.0162107
4	38	1.3893	0.750466	0.0162054
5	38	1.29931	0.653474	0.0161693
6	38	1.52924	0.732273	0.0150917
7	38	1.71831	0.537623	0.0136151
8	38	1.2821	0.406785	0.020603
9	38	1.78441	0.43483	0.0175379
10	38	1.40152	0.491985	0.0149293
11	38	1.36768	0.57933	0.0139624
12	38		0.581908	0.0130139
13	38	1.36406	0.647314	0.01642
14	38	1.35809	0.736032	0.0159015
15	38		0.68596	0.0216203
16	38	1.40803	0.816929	0.0170356
17	38	1.32311	0.697861	0.0185184
18	38	1.44142	0.653777	0.0170593
19	38	1.36532	0.71009	0.0153177
20	38	1.51674	0.914929	0.0200909
21	38	1.35559	0.793496	0.0198966
22	38	1.71745	0.732792	0.0219753
23	38	2.00006	0.758801	0.0158175
24	38	1.86459	0.874304	0.0181011
25	38	2.26234	0.907095	0.0202103
26	38	2.06919	1.06635	0.0214899
27	38	2.16037	1.07561	0.0219188
28	38	2.2071	1.36608	0.0285167
29	38	1.58098	1.36534	0.031245
30	38	1.78456	1.18882	0.0280931
31	38	2.06498	1.40039	0.0359356
32	38	1.69754	1.38684	0.0352099
33	38	1.39795	1.66457	0.0362757
34	38	1.29855	1.39489	0.0342034
35	38	1.63701	1.92299	0.0313376
36	38	1.46587	1.90048	0.0354454
37	38	1.36686	1.72356	0.0311631
38	38	1.93343	1.86762	0.02467
39	38	1.50546	1.67714	0.0243451
40	38	1.2478	1.23769	0.0246399
41	38	1.5835	1.24269	0.0207319
42	38	1.3328	1.00515	0.0168765
43	38		0.89007	0.0189217
44	38	1.35805	1.00052	0.0174602
45	38	1.32178	0.867958	0.0183598
46	38	1.20818	0.852773	0.0180702
47	38		0.599035	0.0162437
48	38	1.47585	0.409965	0.0139504
49	38		0.51625	0.0141168
0	39	1.2271	0.751715	0.0148264
1	39	1.44839	0.782736	0.0145578
2	39	1.38998	0.629529	0.0134198
3	39	1.4732	0.75389	0.0140002
4	39	1.51291	0.542707	0.0110546
5	39	1.69986	0.657281	0.0162494
6	39		0.545794	0.01359
7	39	1.22899	0.426798	0.0192307
8	39		0.551933	0.0153381
9	39	1.29773	0.408584	0.015173
10	39	1.34973	0.573452	0.0169493
11	39		0.593072	0.0133171
12	39	1.33878	0.617659	0.0194555
13	39	1.47892	0.581985	0.0157081
14	39		0.622995	0.0178743
15	39		0.561267	0.0177146
16	39	1.42581	0.6327	0.0186735
17	39		0.713793	0.0225731
18	39	1.58425	0.785884	0.015034
19	39	1.53429	0.858593	0.0229485
20	39	1.62447	0.809316	0.0202434
21	39	1.72664	0.766519	0.0148622
22	39	1.72058	0.82627	0.0165431
23	39	2.00745	0.696287	0.0211848
24	39	1.7019	0.96923	0.0210724
25	39	1.85909	0.988925	0.0217461
26	39	1.93782	0.997837	0.0262829
27	39	2.44813	1.24621	0.0263441
28	39	1.91069	1.33398	0.0270035
29	39	2.19833	1.30101	0.0362949
30	39	1.94539	1.51347	0.0318851
31	39	1.6163	1.60121	0.0303537
32	39	1.65082	1.54078	0.0313794
33	39	1.62672	1.42757	0.0332491
34	39	1.95683	1.70218	0.034004
35	39	1.53398	1.725	0.0319246
36	39	1.40339	1.66902	0.0307505
37	39	1.71587	1.675	0.0308319
38	39	1.63583	1.55586	0.0252067
39	39		1.27834	0.0247109
40	39	1.30308	1.11703	0.0217628
41	39	1.27864	0.915593	0.0209316
42	39		0.793658	0.023057
43	39		0.757785	0.0147819
44	39		0.74892	0.0152631
45	39		0.699995	0.0138021
46	39		0.631124	0.0132991
47	39	1.25175	0.59608	0.00981363
48	39		0.602649	0.0120731
[truncated: 1,051 more rows]
