# Supplementary material for: Correlating STED and synchrotron XRF nano-imaging unveils cosegregation of metals and cytoskeleton proteins in dendrites
Source: eLife journal article supplement (doi:10.7554/elife.62334), 2020-12-08
Supplement: supp [file Fig S2o P_S_Zn_ngmm2_wobg.xlsx]

## Sheet: Feuil1
X	Y	P	S	Zn
0	0		0.529666
1	0	1.31332	0.461945
2	0	1.35975	0.694135	0.0138562
3	0	1.24257	0.447424
4	0	1.45002	0.523787
5	0	1.23317	0.482233
6	0		0.543744	0.0140755
7	0	1.25788	0.379047	0.0140185
8	0		0.397555
9	0	1.28352	0.490374
10	0	1.6231	0.559653
11	0
12	0	1.50649
13	0	1.32191	0.437294
14	0
15	0	1.31705	0.374286
16	0
17	0		0.38577
18	0	1.23589
19	0		0.399204	0.015034
20	0		0.567246
21	0	1.18226	0.476265
22	0	1.17692	0.537022
23	0	1.34017	0.544724	0.0137748
24	0		0.626952
25	0	1.47503	0.50114
26	0	1.23077	0.420192	0.0147638
27	0		0.439772
28	0	1.21691	0.385545
29	0	1.28862
30	0	1.3001
31	0	1.39064	0.442031	0.0154547
32	0	1.21537	0.376989	0.0138477
33	0	1.23196
34	0	1.31461
35	0
36	0
37	0			0.0145072
38	0
39	0
40	0
41	0
42	0
43	0
44	0
45	0
46	0
47	0
48	0
0	1	1.97452	0.641935
1	1	1.39651	0.425068	0.0142889
2	1	1.22579	0.528983
3	1	1.61925	0.542277
4	1	1.40865	0.508056
5	1	1.65003	0.477235
6	1	1.50595	0.404432
7	1	1.22856	0.394563
8	1		0.472899
9	1	1.28194	0.547763
10	1		0.529064	0.0141406
11	1	1.22457
12	1		0.393788
13	1	1.3909	0.440547
14	1		0.476412
15	1
16	1		0.484749
17	1	1.32233	0.421309
18	1		0.372839
19	1		0.49494
20	1	1.26121	0.450485
21	1	1.31859	0.469159
22	1	1.19781	0.538383
23	1		0.50042
24	1	1.25351	0.588193	0.0153418
25	1	1.20238	0.447956
26	1	1.30573	0.505931
27	1	1.31191
28	1		0.368974	0.0142838
29	1	1.44246	0.589889
30	1	1.44308
31	1	1.32852
32	1		0.460727
33	1	1.24815	0.445571
34	1
35	1
36	1		0.402583
37	1
38	1
39	1
40	1
41	1
42	1
43	1
44	1
45	1
46	1
47	1
48	1
0	2	1.72303	0.677628	0.014072
1	2	1.4277	0.613978
2	2	1.28905	0.438427
3	2	1.6749	0.548932
4	2	1.3964	0.637197	0.0155868
5	2	1.38726	0.46743
6	2	1.60268	0.395075	0.0147628
7	2	1.20181	0.40641	0.0143375
8	2	1.25695	0.46231
9	2	1.73193	0.514829
10	2		0.436177
11	2		0.382616
12	2	1.33783	0.418259
13	2	1.44333	0.392254
14	2	1.3654	0.36898
15	2	1.53313	0.435702
16	2		0.420049
17	2	1.23843	0.653285
18	2		0.469753
19	2	1.51007	0.429768
20	2	1.3212	0.55867
21	2		0.578504	0.0149873
22	2		0.504489
23	2	1.27432	0.483591
24	2	1.18591	0.50776
25	2		0.53812
26	2	1.22318	0.58707	0.0137896
27	2	1.16998	0.429692
28	2	1.47568
29	2	1.41257
30	2	1.2156
31	2	1.2991	0.479854
32	2	1.26188
33	2	1.28326		0.0143269
34	2		0.403461
35	2	1.17093	0.373515
36	2		0.415827
37	2		0.379181
38	2
39	2
40	2
41	2
42	2
43	2
44	2
45	2
46	2
47	2
48	2
0	3	1.34002	0.740577
1	3		0.594421
2	3	1.2678
3	3	1.61306	0.62516
4	3	1.60354	0.592113	0.0157438
5	3	1.40431	0.496507
6	3	1.40946	0.547299
7	3	1.90204	0.470552
8	3	1.38586	0.523309
9	3	1.32312	0.47971
10	3	1.63506
11	3	1.29826	0.481579
12	3	1.43505	0.458436
13	3	1.29308
14	3	1.49892	0.457453
15	3	1.33161	0.463127
16	3	1.33599
17	3	1.32617	0.497178
18	3		0.567441
19	3	1.55309	0.39534	0.0139154
20	3	1.38534	0.541738	0.0145724
21	3		0.483904
22	3		0.557124	0.0144171
23	3		0.528756	0.0144609
24	3		0.457569
25	3	1.623	0.477911
26	3	1.39538	0.465673	0.0137584
27	3	1.3648	0.459183
28	3	1.44449	0.473544
29	3
30	3	1.24369	0.430269
31	3	1.1938	0.385367
32	3	1.3038	0.408113
33	3		0.399797
34	3	1.46526	0.497419
35	3
36	3	1.53343
37	3
38	3		0.372961
39	3
40	3
41	3
42	3
43	3	1.32384
44	3
45	3
46	3
47	3
48	3
0	4	1.54484	0.567391	0.0148948
1	4	1.55206	0.530499	0.0164565
2	4	1.42279	0.639
3	4	1.34003	0.572541	0.0150652
4	4	1.41095	0.547188	0.0165404
5	4	1.69352	0.459243
6	4	1.19006	0.610571
7	4	1.18436	0.627087
8	4	1.22244	0.54827
9	4	1.38655	0.378217
10	4	1.29826	0.457566
11	4	1.45396	0.503655
12	4	1.52529	0.558735
13	4	1.23497	0.479968
14	4		0.680137
15	4	1.201
16	4	1.71023	0.474483
17	4	1.27056	0.458264
18	4	1.82232	0.541863
19	4		0.588445
20	4	1.3383	0.504506
21	4	1.58769	0.613375	0.0153494
22	4		0.471367
23	4	1.33888	0.635603
24	4	1.298	0.620559
25	4	1.22768	0.617784
26	4	1.21723	0.578426
27	4	1.20817	0.473927	0.0143219
28	4		0.446526
29	4		0.372879
30	4	1.23042
31	4	1.29213	0.447676
32	4	1.19135	0.387045
33	4		0.401253
34	4
35	4		0.424398
36	4	1.41006
37	4
38	4
39	4
40	4
41	4
42	4
43	4
44	4
45	4
46	4
47	4
48	4
0	5	1.60393	0.484349
1	5	1.5392	0.503524
2	5	1.64986	0.57755
3	5	1.6886	0.569049
4	5	1.47652	0.601137	0.0145702
5	5	1.42895	0.461044
6	5	1.6893	0.456417
7	5	1.50517	0.717946
8	5	1.4952	0.510713
9	5	1.18193	0.546079
10	5	1.81141	0.487524
11	5		0.541998
12	5	1.48729	0.395145
13	5	1.58767	0.486931
14	5	1.30438
15	5		0.425637	0.013911
16	5	1.65298	0.574418	0.0156998
17	5	1.35879	0.48196	0.0149392
18	5	1.31843	0.53752
19	5	1.32636	0.450387
20	5	1.29137	0.389463
21	5	1.59303	0.618493
22	5		0.5276
23	5	1.22604	0.548284
24	5	1.40564	0.639773
25	5	1.27785	0.520921	0.0156605
26	5	1.47369	0.492523
27	5		0.53854	0.0144452
28	5	1.25536	0.469687	0.0150399
29	5	1.35537	0.517921
30	5	1.26228	0.426327
31	5
32	5	1.28108	0.370798
33	5		0.458998	0.0141846
34	5	1.18646
35	5		0.375895
36	5
37	5
38	5
39	5
40	5
41	5
42	5
43	5
44	5
45	5
46	5
47	5
48	5
0	6	1.55823	0.605074
1	6	1.88236	0.551546
2	6	1.25036	0.47449
3	6	1.83343	0.627222
4	6	1.55942	0.664317	0.0156019
5	6	1.50244	0.565207
6	6	1.35186	0.573389	0.0147903
7	6	1.80079	0.67632
8	6	1.64886	0.668014
9	6	1.57169	0.521607
10	6	1.503	0.588428
11	6	1.33742	0.526239	0.0154066
12	6	1.43843	0.432172	0.0139267
13	6	1.1801		0.0150527
14	6	1.36881	0.476901
15	6	1.48895	0.499382	0.0137591
16	6		0.558485
17	6	1.22643	0.563283
18	6	1.55724	0.624588
19	6	1.78796	0.577519	0.016167
20	6	1.42779	0.594086	0.0198296
21	6		0.621063
22	6	1.24829	0.70335	0.0176711
23	6		0.611553	0.0164142
24	6		0.605453	0.0139596
25	6	1.23358	0.699174
26	6	1.3962	0.627685	0.0147595
27	6	1.60967	0.703608	0.0148925
28	6		0.525572
29	6	1.23225	0.439605	0.0138787
30	6	1.74443	0.434252
31	6	1.4638
32	6		0.402066
33	6		0.431602
34	6	1.27928
35	6	1.22033	0.392153
36	6
37	6
38	6
39	6
40	6
41	6
42	6
43	6
44	6
45	6
46	6
47	6
48	6
0	7	1.58542	0.63932
1	7	1.69759	0.420258	0.0144154
2	7	1.48927	0.508459
3	7	1.3363	0.636015
4	7	1.38782	0.799834	0.0151726
5	7	1.65126	0.62837
6	7	1.44111	0.493408	0.0145294
7	7		0.599615
8	7		0.475494
9	7	1.46417	0.620582	0.0167391
10	7	1.72138	0.688675	0.0142989
11	7	1.70531	0.474582
12	7	1.33124	0.484181
13	7	1.3695	0.697839
14	7	1.45511	0.503604
15	7	1.3119	0.425604
16	7	1.35551	0.378514
17	7	1.23516	0.505615
18	7	1.43156	0.409432
19	7	1.19714	0.819791	0.0145448
20	7	1.35264	0.692168	0.0144867
21	7	1.36923	0.595478
22	7		0.525303
23	7	1.42061	0.614074	0.0152309
24	7	1.41557	0.764105	0.0157662
25	7	1.48108	0.638604
26	7		0.604972
27	7	1.70899	0.705525	0.0148238
28	7	1.71735	0.569554	0.0172923
29	7	1.2495	0.62796
30	7	1.49324	0.473107
31	7	1.42607	0.494905	0.0143614
32	7		0.624598	0.0146725
33	7	1.43673	0.441161	0.0166468
34	7
35	7	1.19348	0.384823	0.0151698
36	7		0.433672
37	7
38	7		0.407682
39	7
40	7
41	7
42	7
43	7
44	7
45	7
46	7
47	7
48	7
0	8	1.42611	0.637896
1	8	1.79009	0.648651
2	8	1.23589	0.5846
3	8	1.53134	0.64679	0.0145472
4	8	1.5617	0.706166	0.016388
5	8	1.43538	0.715955
6	8	1.52909	0.486804
7	8	1.18197	0.591157
8	8	1.39248	0.691751
9	8		0.469712
10	8	1.27593	0.569607
11	8	1.20202	0.531554
12	8	1.44608	0.538495	0.0156581
13	8	1.25731	0.438148	0.0153
14	8		0.587218
15	8	1.31249	0.772673
16	8	1.62024	0.661504
17	8	1.67581	0.744344
18	8	1.34862	0.45312	0.0147617
19	8	1.64571	0.765509
20	8	1.33142	0.502745	0.0171465
21	8	1.36025	0.711616	0.01383
22	8	1.19332	0.653272	0.015664
23	8	1.38617	0.582441
24	8	1.19039	0.53924	0.0181715
25	8	1.60488	0.607845	0.0138689
26	8	1.5004	0.548124	0.015192
27	8	1.20395	0.693304
28	8	1.62394	0.61975	0.0176603
29	8	1.53323	0.718162
30	8	1.58081	0.534399
31	8	1.46969	0.51912	0.0139414
32	8	1.20589	0.541683
33	8	1.42556	0.501483
34	8	1.55912
35	8	1.19834		0.0143472
36	8	1.4508
37	8	1.1709	0.382956
38	8
39	8
40	8
41	8
42	8
43	8
44	8
45	8
46	8
47	8
48	8
0	9	1.3269	0.714181
1	9	1.63366	0.657938	0.0152605
2	9	1.5628	0.483835
3	9	1.56791	0.675072	0.0153412
4	9	1.50055	0.719211	0.015143
5	9	1.34212	0.718548	0.014739
6	9	1.54081	0.609308	0.0163874
7	9		0.699892	0.0166514
8	9	1.35809	0.476871
9	9	1.21234	0.648054
10	9	1.27186	0.651547
11	9	1.57533	0.440284	0.0151632
12	9	1.78449	0.653457
13	9	1.48677	0.523474
14	9	1.44865	0.59585
15	9	1.73742	0.552043
16	9	1.87204	0.498031
17	9	1.24922	0.553634
18	9	1.44372	0.68018	0.014456
19	9		0.53011
20	9	1.2571	0.62853	0.0154504
21	9	1.24382	0.59076
22	9	1.73092	0.627185	0.0157051
23	9		0.579512	0.014738
24	9		0.778842
25	9	1.35093	0.70813	0.0163065
26	9	1.34623	0.582538	0.0144042
27	9		0.628586	0.017168
28	9	1.22794	0.671845	0.0151947
29	9	1.54059	0.746655	0.0164107
30	9	1.17793	0.55103	0.0163007
31	9	1.35768	0.513215	0.0138561
32	9	1.43971	0.693366	0.0138799
33	9	1.2527	0.526917
34	9	1.26723	0.611447	0.0151711
35	9		0.558522	0.0159556
36	9	1.23768
37	9		0.436854
38	9		0.386531
39	9
40	9
41	9
42	9
43	9
44	9
45	9
46	9
47	9
48	9
0	10	1.3545	0.716951
1	10	1.3775	0.571825	0.0144713
2	10	1.48662	0.540367
3	10	1.29673	0.526289	0.016984
4	10	1.44857	0.66025	0.0166449
5	10	1.35954	0.585311	0.0148291
6	10	1.27524	0.656318	0.0146538
7	10		0.674182	0.014032
8	10	1.40793	0.706138
9	10	1.34347	0.696703
10	10	1.29686	0.658398
11	10	1.71011	0.640477	0.0174296
12	10	1.60821	0.516648
13	10	1.57941	0.538572	0.0157907
14	10	1.63131	0.639398
15	10	1.23826	0.598605
16	10	1.39458	0.568252
17	10	1.22907	0.600343
18	10	1.70465	0.515718
19	10	1.51022	0.58934	0.0146127
20	10	1.46682	0.850019
21	10	1.3803	0.730782	0.0158877
22	10	1.20076	0.69474
23	10	1.19839	0.919836
24	10		0.631382	0.0140537
25	10	1.56136	0.860652	0.0165771
26	10	1.33884	0.772385	0.0137688
27	10	1.45392	0.652089	0.0191126
28	10	1.185	0.73113	0.0158799
29	10	1.20623	0.902544	0.018364
30	10	1.74915	0.714191	0.0152721
31	10	1.23253	0.564978	0.0138438
32	10	1.61555	0.720181
33	10	1.48636	0.681914	0.0163205
34	10	1.70476	0.561866	0.01983
35	10	1.4742	0.57643	0.0152002
36	10		0.529706
37	10	1.50535
38	10	1.32268
39	10			0.014808
40	10		0.373748
41	10
42	10		0.389935
43	10
44	10
45	10
46	10
47	10
48	10
0	11	1.45898	0.679998	0.0141149
1	11	1.44453	0.635137
2	11	1.73383	0.628584
3	11	1.24859	0.537731
4	11	1.61104	0.78258
5	11	1.53643	0.547969
6	11	1.5962	0.561829
7	11	1.31365	0.529613
8	11	1.54811	0.628893
9	11	1.82641	0.697859	0.0142764
10	11	1.40305	0.530545
11	11	1.8967	0.645172	0.0139223
12	11	1.57881	0.557943
13	11	1.76855	0.534237
14	11	1.63836	0.702137
15	11	1.59425	0.662255
16	11	1.43783	0.684184	0.0168013
17	11	1.61227	0.682454
18	11	2.06162	0.709269	0.0157295
19	11	1.47187	0.697291	0.0149334
20	11	1.23871	0.66409
21	11	1.26036	0.648461	0.0160433
22	11		0.573046	0.0154926
23	11	1.54835	0.673765	0.0186602
24	11		0.618864
25	11	1.44347	0.735135	0.0147527
26	11	1.70012	0.793275	0.0178134
27	11	1.43596	0.771847	0.0164425
28	11	1.77903	0.644589	0.016578
29	11	1.31578	0.644391	0.0193453
30	11	1.30449	0.786566	0.0179024
31	11		0.631713	0.0154719
32	11	1.22476	0.595073
33	11	1.44943	0.941531
34	11	1.19153	0.649824	0.0142847
35	11	1.37145	0.702103	0.0137774
36	11		0.412703	0.0140297
37	11	1.34049	0.495775
38	11	1.61014	0.483927
39	11
40	11
41	11	1.30757	0.401785
42	11
43	11
44	11	1.18866
45	11
46	11
47	11
48	11
0	12	1.32886	0.695226
1	12	1.49026	0.641199
2	12	1.1725	0.752598
3	12	1.45453	0.63373
4	12	1.74501	0.730906
5	12	1.73901	0.706076	0.0151894
6	12	1.53379	0.932202	0.0142768
7	12	1.59962	0.674058
8	12	1.6224	0.573929
9	12	1.49555	0.822125
10	12	1.88515	0.771826
11	12	1.29672	0.649888	0.0166749
12	12	1.62007	0.673632	0.0148046
13	12	1.43709	0.473661
14	12	1.284	0.55919	0.0151473
15	12	1.7757	0.764512	0.0152224
16	12	1.3134	0.534305	0.0164971
17	12	1.20974	0.686456	0.0155492
18	12	1.17949	0.76452
19	12	1.73335	0.685974	0.0172576
20	12	1.58261	0.776524	0.0176567
21	12	1.59133	0.506686
22	12	1.40182	0.841515
23	12	1.48374	0.676249
24	12	1.48062	0.651622	0.0167026
25	12	1.42729	0.686387
26	12	1.57229	0.759521	0.0180014
27	12	1.17366	0.682312	0.0141781
28	12	1.44317	0.769397	0.0179637
29	12	1.34077	0.821838	0.0203942
30	12	1.47044	0.686586	0.0176367
31	12	1.36366	0.799932	0.0149575
32	12	1.64257	0.738612	0.0138888
33	12	1.60048	0.712336
34	12	1.45417	0.582106
35	12	1.18729	0.591914
36	12	1.38054	0.554725	0.0139053
37	12	1.22819	0.578937
38	12	1.38241	0.411737
39	12	1.24429	0.407198
40	12	1.20844	0.396498
41	12	1.22213
42	12	1.27558	0.454912
43	12			0.0142877
44	12
45	12
46	12
47	12
48	12
0	13	1.61921	0.578347	0.0150048
1	13	1.44165	0.819095
2	13	1.91145	0.595283
3	13	1.53383	0.652627
4	13	1.26649	0.740658
5	13	1.68137	0.823654	0.0141455
6	13	1.22622	0.807602
7	13	1.51521	0.715161	0.014928
8	13	1.56274	0.645264
9	13	1.46432	0.672274
10	13	1.36055	0.683267
11	13	1.44197	0.658279
12	13	1.46522	0.541922
13	13	1.48026	0.532473
14	13	1.54425	0.722651
15	13	1.44329	0.680866	0.0149424
16	13	1.4445	0.691486	0.0153503
17	13	1.46781	0.595489	0.0144202
18	13	1.77354	0.759944	0.0163174
19	13	1.95042	0.685939	0.0171343
20	13	1.50192	0.75565	0.0158904
21	13	1.19311	0.759964	0.0198313
22	13	1.40962	0.622943
23	13		0.74914	0.0193172
24	13	1.46198	0.792167	0.0180285
25	13	1.2177	0.658876	0.0190995
26	13		0.771254	0.0156043
27	13	1.5646	0.827548	0.0177147
28	13	1.21717	0.662311	0.0139094
29	13	1.55317	0.65535	0.0150683
30	13	1.3065	0.775179	0.0173065
31	13		0.653697	0.0163416
32	13	1.56178	0.681678	0.0169717
33	13	1.78552	0.580802	0.0154291
34	13	1.64653	0.645773	0.0171786
35	13	1.68961	0.578423
36	13	1.42745	0.661685
37	13	1.18545	0.638032
38	13	1.58774	0.561572
39	13	1.32295	0.40739
40	13	1.20726	0.449261
41	13		0.399653
42	13		0.406494
43	13	1.24561
44	13
45	13	1.21381
46	13
47	13
48	13
0	14	1.48794	0.593103	0.014702
1	14	1.52992	0.768328
2	14	1.41222	0.672097
3	14	1.46859	0.594722	0.0160277
4	14	1.57204	0.583825	0.0155349
5	14	1.48024	0.534476	0.0153584
6	14	1.54072	0.791544
7	14	1.33688	0.49431
8	14	1.57668	0.616033	0.0140158
9	14	1.21208	0.945769
10	14	1.20496	0.708336
11	14	1.40001	0.64743	0.014973
12	14	1.52803	0.729988	0.0162503
13	14	1.34401	0.770304
14	14	1.44135	0.559033	0.0157504
15	14	1.90814	0.745716	0.0143409
16	14	1.76065	0.606631	0.0141096
17	14	1.5665	0.575164
18	14	1.80986	0.672492
19	14	1.52117	0.690772	0.014461
20	14	1.62264	0.599736	0.0148576
21	14	1.29402	0.871535	0.0163217
22	14	1.57281	0.604947	0.0165689
23	14	1.18906	0.807848	0.0158904
24	14	1.48506	0.820896	0.0210304
25	14	1.3162	0.830904	0.0184324
26	14	1.26892	0.89213	0.0139649
27	14	1.64933	0.813642	0.0159821
28	14	1.5421	0.979644	0.0166996
29	14	1.95743	0.726178	0.0201956
30	14	1.39156	0.842563	0.0177491
31	14	1.45489	0.832094
32	14	1.26755	0.766652	0.0156129
33	14	1.60811	0.726352	0.0163722
34	14	1.82581	0.690227	0.0157118
35	14	1.77277	0.654241	0.0169415
36	14	1.74269	0.630168	0.0172605
37	14	1.53521	0.599486
38	14	1.50751	0.572392
39	14		0.522896
40	14		0.393484
41	14	1.27535	0.389231
42	14	1.47266	0.424118
43	14	1.25606	0.378781
44	14		0.379563
45	14	1.37225	0.428078
46	14	1.39049	0.395961
47	14
48	14
0	15	1.66153	0.73136
1	15	1.62114	0.76126
2	15	1.28765	0.769178
3	15	1.57067	0.66836
4	15	1.39137	0.605939	0.0161956
5	15	1.27682	0.799349
6	15	1.63117	0.834527
7	15	1.75141	0.809029
8	15	1.47405	0.736495
9	15	1.25404	0.662261
10	15	1.25348	0.571022
11	15	1.68031	0.862453	0.0140619
12	15	1.51506	0.746625
13	15	1.51758	0.62007
14	15	1.46899	0.782494	0.0177864
15	15	1.24612	0.785807	0.014149
16	15	1.45218	0.783575	0.0173046
17	15	1.38919	0.707231
18	15	1.37485	0.877395
19	15	1.75936	0.894885	0.0147462
20	15	1.34978	0.762326
21	15	1.21873	0.629204	0.01956
22	15	1.4427	0.705035	0.0154642
23	15	1.47548	0.789388	0.0167477
24	15	1.42594	0.777356	0.0160431
25	15	1.27917	0.989416	0.0193311
26	15	1.64052	0.632144	0.0151955
27	15	1.62142	0.911984	0.0185178
28	15	1.64115	0.802341	0.0160459
29	15	1.58774	0.76689	0.0182969
30	15	1.45104	0.822981	0.0168757
31	15	1.85218	0.94731
32	15	1.39718	0.763326	0.0184827
33	15	1.55218	0.858236	0.0166952
34	15	1.25039	0.884564	0.0167398
35	15	1.4632	0.773097	0.0145904
36	15	1.28064	0.854782	0.0171581
37	15	1.4136	0.752471	0.0147644
38	15	1.38256	0.66523
39	15	1.44208	0.607906	0.01644
40	15	1.25552	0.533087	0.0137995
41	15	1.31554	0.519855
42	15	1.18701	0.415514
43	15	1.21613	0.563449
44	15
45	15
46	15	1.29823	0.38561
47	15
48	15
0	16	1.54785	0.746549
1	16	1.35555	0.716854	0.0148751
2	16	1.17118	0.434224	0.0158215
3	16	1.64451	0.7281	0.0174373
4	16	1.7259	0.901818
5	16	1.32276	0.770537
6	16	1.82099	0.838435
7	16	1.44719	0.730817	0.0146667
8	16	1.76892	0.843921	0.0147855
9	16	1.51523	0.614076
10	16	1.5742	0.624593	0.0145398
11	16	1.57276	0.64354	0.0150666
12	16	1.82269	0.806877	0.0142451
13	16	1.49967	0.915451
14	16	1.37225	1.04586	0.0147499
15	16	1.49943	0.721982	0.0166586
16	16	1.51242	0.645699
17	16	1.76998	0.743071
18	16		0.608742	0.0200447
19	16	1.45966	0.701622	0.0168084
20	16	1.96921	0.840774	0.0155695
21	16	1.35971	0.836036	0.0147115
22	16	1.21451	0.781848	0.0148993
23	16	1.56862	0.808221	0.0163126
24	16	1.40575	0.914279	0.0147343
25	16	1.21061	0.71569	0.0211424
26	16	1.65823	0.982388	0.0206674
27	16	1.51714	0.801847	0.0174009
28	16	1.42982	0.822673	0.0188153
29	16	1.48973	0.95348
30	16	1.31795	0.953525	0.0176217
31	16	1.41981	1.02425	0.0164796
32	16	1.45115	0.755102	0.0183505
33	16	1.6304	0.829195	0.0184874
34	16	1.32933	0.909443	0.0159346
35	16	1.65141	0.58565	0.018765
36	16	1.35953	0.687171	0.0175543
37	16	1.21347	0.577674	0.0162409
38	16	1.45616	0.577789
39	16	1.26607	0.543128
40	16	1.19292	0.565918	0.0139889
41	16	1.50504	0.432624
42	16	1.64522	0.466748	0.0176592
43	16	1.36994	0.532076
44	16	1.29975	0.496869	0.0170766
45	16	1.19104	0.42764	0.0148351
46	16
47	16
48	16
0	17	1.39862	0.703863	0.0171035
1	17	1.38319	0.788473	0.0160204
2	17	1.60633	0.827684
3	17	1.55509	0.821084
4	17	1.17151	0.854042
5	17	1.45724	0.743264
6	17	1.97169	0.771259	0.0162186
7	17	1.815	0.553196	0.014317
8	17	1.40183	0.691881
9	17	1.4059	0.773817
10	17	1.50527	0.602481
11	17	1.82298	0.665526
12	17	1.53978	0.630763
13	17	1.39506	0.888235
14	17	1.52836	0.598094	0.0173616
15	17	1.33887	0.771726
16	17	1.56602	0.568066
17	17	1.52467	0.723468	0.0147904
18	17	1.67261	0.886164	0.015643
19	17	1.82094	0.665134
20	17		0.752443	0.0141135
21	17	1.72528	0.642023
22	17	1.71168	0.714025	0.0156393
23	17	1.86325	0.907825	0.0149617
24	17		0.83961	0.0153142
25	17	1.33687	0.996148	0.0162021
26	17	1.23523	0.879782	0.0190802
27	17	1.21559	0.807773	0.020688
28	17		0.735132	0.0198751
29	17	1.20667	0.936017	0.0190062
30	17	1.23827	0.621938	0.0149145
31	17	1.17874	0.803884	0.0187281
32	17	1.23711	0.722689	0.0169372
33	17	1.44851	0.742927	0.0194353
34	17	1.67325	1.06833	0.0189329
35	17	1.19441	0.960202	0.0162137
36	17	1.6578	0.494205	0.0156195
37	17	1.27275	0.649625	0.0184133
38	17	1.21152	0.620825	0.0163571
39	17		0.467449
40	17		0.514713	0.0162364
41	17		0.640872	0.0166478
42	17	1.18287	0.464769
43	17		0.451231
44	17	1.25344	0.403768
45	17	1.25785	0.378976
46	17		0.441563
47	17			0.0174612
48	17		0.382212
0	18	1.32764	0.732915	0.0175059
1	18	1.59784	0.724668	0.0161013
2	18	1.21968	0.708514	0.0152584
3	18	1.39531	0.814485
4	18	1.38925	0.741667
5	18	1.82244	0.853114
6	18	1.48197	0.532279	0.0158759
7	18	1.22869	0.768906	0.0146785
8	18	1.32772	0.738631
9	18	1.58208	0.741787	0.014127
10	18	1.86696	0.663094	0.0163695
11	18	1.61614	0.692778
12	18	1.28572	0.83466
13	18	1.43804	0.846553	0.0151726
14	18	1.36905	0.817338	0.0169657
15	18	1.19973	0.735835
16	18	1.31923	0.694228	0.0200063
17	18		0.81808	0.0138533
18	18	1.31657	0.881034	0.0156938
19	18	1.45463	0.928213	0.0169743
20	18	1.24098	0.532696
21	18	1.55907	0.977242	0.0145851
22	18	1.36247	0.782026	0.0156642
23	18	1.44885	0.683886	0.019861
24	18	1.33234	0.862361	0.0156583
25	18	1.30622	0.852184	0.0162478
26	18	1.51942	0.868267	0.0177971
27	18	1.25867	0.811096	0.0181403
28	18	1.29398	0.840541	0.0238865
29	18	1.22484	0.944483	0.0172195
30	18	1.40255	0.917687
31	18	1.20499	0.795127	0.0170924
32	18	1.22698	0.767154	0.0178508
33	18	1.23019	0.794186	0.0177179
34	18	1.549	0.79012	0.0184075
35	18	1.66035	0.765637	0.0175255
36	18	1.57794	0.672139	0.0193024
37	18	1.17934	0.657808	0.0189112
38	18	1.6652	0.741676	0.0178125
39	18	1.4136	0.609447
40	18		0.693561	0.015289
41	18	1.34848	0.589789	0.0162672
42	18	1.16876	0.497166	0.0177356
43	18		0.510708	0.0142495
44	18	1.32995	0.554999
45	18		0.503171
46	18		0.493875	0.0151996
47	18
48	18
0	19	1.82853	0.69905
1	19	1.23027	0.734673
2	19	1.4089	0.671199
3	19	1.43346	0.810197
4	19	1.42073	0.682953	0.0174036
5	19	1.47472	0.835454
6	19	1.66176	0.802065	0.0160787
7	19	1.54943	0.713123
8	19	1.54065	0.864469
9	19	1.39541	0.714433
10	19	1.32225	0.75168
11	19	1.23304	0.644588
12	19	1.39923	0.594866
13	19	1.5519	0.906191	0.014804
14	19	1.76063	0.689797	0.0176921
15	19	1.43024	0.743854	0.0169657
16	19	1.23514	0.786247	0.0171595
17	19	1.43531	0.702396
18	19	1.299	0.73687	0.0148506
19	19	1.57252	1.02354
20	19	1.35954	0.658154	0.019323
21	19	1.75655	0.908977
22	19	1.26617	0.75414	0.0175722
23	19	1.45669	0.824402	0.0138823
24	19	1.25964	0.865115	0.0207215
25	19	1.31419	1.06196	0.0181403
26	19		0.840327	0.0196634
27	19	1.36191	0.839915	0.017807
28	19	1.34759	0.92049	0.019344
29	19	1.4457	0.861615	0.0243893
30	19	1.46054	0.773147	0.0212572
31	19	1.95417	0.641645	0.0209383
32	19	1.55338	0.684441	0.0199987
33	19	1.64516	0.795289	0.0179125
34	19	1.17423	0.850046	0.020239
35	19	1.4476	0.751052	0.0205119
36	19	1.26901	0.832017	0.02129
37	19		0.776625	0.0164928
38	19	1.28861	0.850046	0.0195898
39	19	1.33141	0.81238	0.0160071
40	19	1.56234	0.730586	0.017094
41	19	1.59382	0.629286	0.0151432
42	19		0.522377	0.0178023
43	19	1.17336	0.551658	0.0164163
44	19		0.431255	0.0155752
45	19		0.553654
46	19	1.2078	0.395602	0.0148678
47	19
48	19
0	20	1.55299	0.487817
1	20	1.51992	0.710525
2	20	1.73871	0.734836
3	20	1.71535	0.929318
4	20	1.33265	0.720804
5	20	1.59815	0.690046	0.0143325
6	20	1.30383	0.99673
7	20	1.42104	0.596653
8	20	1.96949	0.888568	0.0160729
9	20	1.27009	0.600209	0.0151228
10	20	1.54277	0.767927	0.0150324
11	20	1.25862	0.649934	0.0181642
12	20	1.62989	0.801287
13	20	1.2441	0.665556
14	20	1.24784	0.535536	0.0148586
15	20	1.54288	0.721716
16	20		0.797777	0.0172933
17	20	1.67213	0.713083	0.0183511
18	20	1.8905	0.739367
19	20	1.62339	0.706579	0.0185511
20	20	1.50823	0.707818	0.0158015
21	20	1.6475	0.886957	0.0184187
22	20	1.34877	0.829868	0.0148926
23	20	1.38473	0.872946	0.017903
24	20	1.41169	0.858366	0.0168294
25	20	1.34326	0.656159	0.0171046
26	20	1.33906	0.718707	0.0206784
27	20	1.66378	0.888857	0.0146709
28	20	1.35908	0.841856	0.0159783
29	20		0.965099	0.0203347
30	20	1.33178	0.826656	0.0205368
31	20	1.38746	0.790526	0.0173471
32	20	1.27536	0.799846	0.0207299
33	20	1.3784	0.769474	0.0169935
34	20	1.27004	0.812202	0.0214553
35	20		1.02973	0.0179855
36	20		0.736399	0.0180289
37	20	1.43337	0.778016	0.0178134
38	20	1.61439	0.777767	0.0174348
39	20	1.39995	0.785091	0.0145787
40	20		0.816022
41	20		0.686379	0.0160299
42	20	1.38591	0.566323	0.0188496
43	20	1.31733	0.609315	0.0175015
44	20	1.33367	0.53131	0.014919
45	20		0.55946	0.0160444
46	20		0.425198
47	20
48	20		0.394322
0	21	1.66305	0.512183
1	21	1.49172	0.713054
2	21	1.3094	0.692834
3	21	1.61098	0.553198
4	21	1.17199	0.772646	0.0154554
5	21	1.63462	0.649716
6	21	1.44377	0.986352
7	21	1.51975	0.763149	0.0163838
8	21	1.5623	0.634534
9	21	1.31741	0.696064
10	21	1.25576	0.730616	0.0146607
11	21	1.49177	0.664484
12	21	1.20022	0.837438	0.0140562
13	21	1.78089	0.566007	0.0179962
14	21	1.42853	0.782078	0.0176256
15	21	1.44287	0.824999	0.0151116
16	21	1.33997	0.703569	0.0142481
17	21	1.41317	0.758384	0.0166909
18	21	1.31114	0.591585	0.0151602
19	21	1.74872	0.77854	0.0141165
20	21	1.57681	0.700607	0.0179942
21	21	1.42645	0.844858	0.0141866
22	21	1.6807	0.852663	0.0169075
23	21	1.39696	0.864671	0.0154103
24	21	1.68371	0.783788	0.0169291
25	21	1.38531	0.917788	0.0189495
26	21	1.27414	0.901869	0.0165998
27	21	1.20426	0.918892	0.0179127
28	21	1.19006	1.04745	0.0185348
29	21	1.2568	0.884423	0.0189039
30	21	1.55989	1.00247	0.0176591
31	21	1.61785	0.958159	0.0209077
32	21	1.82618	0.570456	0.0232293
33	21	1.23494	0.820106	0.02065
34	21	1.58739	0.677613	0.0193535
35	21	1.46449	0.814667	0.0201243
36	21	1.44502	0.873681	0.0154945
37	21	1.68574	0.681474	0.020329
38	21	1.54608	0.659687	0.0170349
39	21	1.57956	0.828818	0.0198412
40	21	1.71958	0.701799	0.0206294
41	21		0.568519	0.0188224
42	21	1.21689	0.603067	0.0153172
43	21	1.43082	0.669888	0.015025
44	21	1.33852	0.456581	0.0160274
45	21		0.511825	0.0140112
46	21		0.523294
47	21			0.0159001
48	21		0.438934
0	22	1.39869	0.617429
1	22	1.50083	0.789094	0.0138356
2	22	1.68561	0.573107
3	22	1.75203	0.539415
4	22	1.28285	0.863961	0.0140949
5	22	1.67229	0.587209	0.0147436
6	22	1.59396	0.555054	0.0183389
7	22	1.49921	0.555997	0.0154417
8	22	1.54336	0.635522	0.0151776
9	22	1.79567	0.59526	0.016255
10	22	1.81433	0.796616
11	22	1.44074	0.624957	0.0138799
12	22		0.71526	0.0141402
13	22	1.41023	0.684543	0.0154339
14	22	1.87377	0.823092
15	22	1.41717	0.704029	0.016015
16	22	1.47291	0.676104
17	22	1.37146	0.70175	0.0159618
18	22	1.65893	0.654003	0.0172184
19	22	1.48079	0.907925
20	22	1.8728	0.746
21	22	1.84735	0.884924	0.0175234
22	22	1.6571	0.840194
23	22	1.37264	0.874634	0.0181618
24	22	1.4106	0.88722	0.0179328
25	22	1.62399	0.931065	0.0196109
26	22	1.25307	0.907431	0.0144984
27	22	1.4165	0.930541	0.0226227
28	22	1.3166	0.793394	0.0179482
29	22	1.54168	0.82592	0.0189521
30	22	1.55884	0.986916	0.0157389
31	22	1.56971	0.835781	0.0221251
32	22	2.01664	0.838506	0.0207192
33	22	1.19789	0.981963	0.024062
34	22		0.852319	0.0206084
35	22	1.38475	0.903909	0.0184837
36	22	1.29905	0.952254	0.023775
37	22	1.39795	0.783404	0.0237938
38	22	1.38062	1.00607	0.0205282
39	22	1.51977	0.850795	0.0192862
40	22	1.76477	0.785012	0.0210742
41	22	1.70942	1.01583	0.0215294
42	22	1.43586	0.738745	0.0206855
43	22	1.22819	0.594703	0.020379
44	22	1.3492	0.611082	0.02196
45	22	1.17865	0.582445	0.0156029
46	22			0.0172382
47	22
48	22
0	23	1.18924	0.837584
1	23	1.46549	0.660874
2	23	1.52966	0.668983
3	23	1.28926	0.741627	0.0168215
4	23	1.43615	0.629434
5	23	1.65639	0.672887
6	23	1.49998	0.743885
7	23	1.485	0.814982
8	23	1.40499	0.736111	0.0163577
9	23	1.59245	0.813062
10	23	1.68062	0.81844
11	23	1.78506	0.582794
12	23	1.79652	0.661163
13	23	1.22399	0.813166	0.0140072
14	23	1.42679	0.705493	0.0148319
15	23	1.60709	0.669142	0.0137838
16	23	1.44995	0.658774
17	23	1.77422	0.610294
18	23	1.58078	0.775006	0.0154048
19	23	1.53685	0.777167
20	23	1.76971	0.843855
21	23	1.60856	0.764154	0.0167885
22	23	1.44037	0.817997	0.0159633
23	23	1.59457	0.909643	0.0158747
24	23	1.42051	0.876801	0.0186466
25	23		0.858106	0.016948
26	23	1.46849	0.907331	0.017643
27	23	1.34952	0.796875	0.0169075
28	23	1.31067	0.967647	0.0203025
29	23	1.22008	1.04015	0.0223298
30	23	1.31301	0.88859	0.0202881
31	23	1.37072	0.984369	0.019273
32	23	1.22402	0.898031	0.0156658
33	23		1.01159	0.0147365
34	23	1.4179	1.04232	0.0197313
35	23	1.34405	0.854618	0.0234539
36	23	1.35305	0.781087	0.0251543
37	23	1.40403	0.890898	0.0226912
38	23	1.48437	0.823251	0.0187254
39	23	1.19614	0.857826	0.0204411
40	23	1.71937	0.86993	0.0215126
41	23	1.36982	0.830097	0.01889
42	23	1.50226	0.742636	0.0221734
43	23	1.53607	0.461185	0.017296
44	23		0.45717	0.0217827
45	23	1.26098	0.465897	0.0178435
46	23		0.392174	0.016744
47	23			0.015119
48	23			0.0150007
0	24	1.76628	0.520553
1	24	1.16904	0.553946	0.0171193
2	24	1.52063	0.6467	0.0142159
3	24	1.26064	0.543992
4	24	1.55955	0.642174
5	24	1.3094	0.729368	0.0153526
6	24	1.29971	0.761454
7	24	1.38768	0.727457	0.0148634
8	24	1.67795	0.725154	0.0169788
9	24	1.27999	0.73953
10	24	1.80023	0.750797	0.0149051
11	24	1.85541	0.625736	0.0149576
12	24	1.60836	0.741953
13	24	1.36457	0.680619	0.0156645
14	24	1.66789	0.738474	0.0148038
15	24	1.42986	0.674369	0.0172763
16	24	1.74281	0.877009	0.014712
17	24	1.72694	0.83796	0.0148834
18	24	1.39662	0.910962	0.0144272
19	24	1.58889	0.946347	0.0177012
20	24	1.90097	0.552501	0.0179384
21	24	1.73735	0.92019	0.0145302
22	24	1.77498	0.945917	0.0169106
23	24	1.75061	0.763861	0.0202888
24	24	1.52132	0.985155	0.0174545
25	24		0.85245	0.0211764
26	24	1.4304	0.918216	0.0254599
27	24	1.52307	1.0836	0.018271
28	24	1.48538	0.747945	0.0237095
29	24	1.36349	0.962909	0.0217584
30	24	1.93667	1.04216	0.0233565
31	24	1.46258	0.808447	0.0206035
32	24	1.54294	0.830576	0.0204365
33	24	1.75047	0.890315	0.0220336
34	24	1.46677	0.958036	0.0234543
35	24	1.37367	0.975976	0.0167586
36	24	1.44972	0.875028	0.0231151
37	24	1.25913	0.822429	0.0232816
38	24		0.953627	0.0230265
39	24	1.65894	0.993251	0.0280645
40	24	1.70126	0.863667	0.0236476
41	24		0.834223	0.0243812
42	24	1.27741	0.65873	0.0257837
43	24	1.3907	0.718309	0.0198466
44	24	1.56883	0.471656	0.0148162
45	24		0.420461	0.0140493
46	24	1.21214	0.608652
47	24	1.38475
48	24
0	25	1.22341	0.50477
1	25	1.43176	0.779934
2	25	1.49856	0.490033	0.0146123
3	25	1.31721	0.700403
4	25	1.24854	0.752332	0.0163612
5	25	1.30296	0.655745	0.0137795
6	25	1.47572	0.695939	0.0142023
7	25	1.1815	0.799905	0.0165011
8	25	1.6101	0.680773	0.0139919
9	25	1.5455	0.795389	0.0148757
10	25	1.56874	0.791311	0.0194445
11	25	1.42586	0.701144
12	25	1.86614	0.737265
13	25	1.64309	0.770634	0.0183043
14	25	1.4045	0.793588
15	25	1.80873	0.711709	0.0152312
16	25	1.64616	0.609959
17	25	1.70337	0.742347	0.0166535
18	25	1.73624	0.655447	0.0162902
19	25	1.34362	0.944233	0.0191067
20	25	1.58722	0.87447	0.0232973
21	25	1.75781	0.838757	0.0170983
22	25	1.4339	0.906891	0.0185693
23	25	1.2861	0.81385	0.0191601
24	25	1.37452	0.801978	0.023456
25	25	1.48379	0.883544	0.0158466
26	25	1.5479	0.962171	0.0220592
27	25	1.28756	0.890728	0.0178267
28	25	1.6925	0.861902	0.0199205
29	25	1.30095	0.995289	0.017438
30	25	1.53373	1.00379	0.0183026
31	25	1.23978	0.825894	0.0217616
32	25	1.45441	0.874389	0.0230406
33	25	1.28355	0.931268	0.0158472
34	25	1.56241	0.912405	0.0196837
35	25	1.49726	0.984348	0.0209613
36	25	1.56092	1.06233	0.0266942
37	25	1.39631	0.988925	0.0223456
38	25	1.21094	1.00406	0.0246476
39	25	1.43171	0.973666	0.0216536
40	25	1.49537	1.02329	0.0247197
41	25	1.49343	0.845277	0.0228928
42	25		0.811031	0.0210883
43	25	1.21895	0.64298	0.0202841
44	25		0.539046	0.0154953
45	25
46	25		0.511318
47	25
48	25
0	26	1.57597	0.706941
1	26	1.3439	0.654677	0.016198
2	26	1.70534	0.69967
3	26	1.32672	0.633798
4	26	1.25962	0.49863
5	26	1.43555	0.678706
6	26	1.38319	0.624207
7	26	1.38851	0.651762	0.0150896
8	26	1.59664	0.704255	0.0137656
9	26	1.53111	0.70874
10	26	1.70426	0.885423
11	26	1.53869	0.67513	0.013946
12	26	1.56853	0.674094	0.0145816
13	26	1.99699	0.645063	0.0166446
14	26	1.59985	0.87835	0.0144117
15	26	1.70936	0.655624	0.0141887
16	26	1.44832	0.729695	0.0152291
17	26	1.51556	0.674394	0.0151604
18	26	1.62832	0.680787
19	26	1.64508	0.642267	0.0145071
20	26	1.67812	0.850381	0.0192456
21	26	1.51872	1.04496	0.0177343
22	26	1.71775	0.910536	0.018429
23	26	1.30326	1.0251	0.0161428
24	26	1.89446	0.714689
25	26	1.52484	1.09821	0.0218252
26	26	1.55035	1.0398	0.0225375
27	26	1.50378	1.04457	0.0154453
28	26	1.3904	0.948406	0.0221274
29	26	1.42662	0.974381	0.020765
30	26	1.33007	0.936448	0.0181648
31	26	1.31047	0.996874	0.0168223
32	26	1.35113	0.930383	0.0184614
33	26	1.48172	0.854253	0.0227397
34	26	1.40889	0.870697	0.0202092
35	26	1.41433	0.910436	0.0229736
36	26	1.67899	0.988615	0.0240961
37	26		1.05246	0.0216378
38	26	1.51196	1.09661	0.0238735
39	26	1.26556	1.03996	0.0218898
40	26	1.31017	0.984917	0.0259176
41	26	1.46707	0.990946	0.0176565
42	26	1.26053	0.894524	0.0220277
43	26	1.651	0.598809	0.0162543
44	26	1.31426	0.437934	0.0161713
45	26	1.16859	0.526852	0.0151174
46	26			0.0147309
47	26		0.457715
48	26
0	27	1.3592	0.40088
1	27	1.34075	0.542103
2	27	1.36262	0.576493	0.014034
3	27	1.35265	0.653669	0.0138906
4	27	1.39416	0.62566
5	27	1.38629	0.669223	0.0165107
6	27	1.51519	0.707225	0.0155407
7	27	1.45421	0.743871
8	27	1.76093	0.651094
9	27	1.36545	0.787542
10	27	1.17498	0.824021
11	27	1.6679	0.81622
12	27	1.54106	0.877621
13	27	1.51264	0.861576
14	27	1.65907	0.8415	0.014015
15	27	1.57414	0.731032	0.0149876
16	27	1.7758	0.72955	0.0168632
17	27	1.56601	0.917972	0.0141806
18	27	1.63767	0.728371	0.0218823
19	27	1.79315	0.980225
20	27	1.37755	0.971991	0.0140801
21	27	1.52508	0.951462	0.0237553
22	27	1.61442	0.779181	0.0292454
23	27	1.46185	0.857026	0.0165606
24	27	1.1858	1.0344	0.0175603
25	27	1.28066	0.861005	0.01869
26	27	1.42772	0.902389	0.0223883
27	27	1.53426	0.90469	0.0181033
28	27	1.59487	0.93949	0.0208993
29	27		0.696101	0.0206208
30	27		1.15868	0.0183354
31	27	1.32741	1.10543	0.0205027
32	27		0.819237	0.0199355
33	27		1.02381	0.022765
34	27	1.94805	0.810771	0.0219116
35	27	1.36029	0.995975	0.016862
36	27		1.08236	0.0212139
37	27	1.22392	1.0477	0.0248985
38	27	1.27783	1.01169	0.0294024
39	27	1.32506	1.09697	0.0312249
40	27		1.07724	0.0300582
41	27	1.20712	0.974078	0.0189465
42	27		0.604473	0.0195814
43	27	1.42864	0.725532	0.0176067
44	27		0.512401	0.0169443
45	27	1.18714
46	27
47	27
48	27
0	28	1.2384	0.421447
1	28		0.63641
2	28	1.22932	0.404651	0.0143009
3	28	1.21107	0.801441	0.0140007
4	28	1.88918	0.658185
5	28	1.24451	0.834452	0.0160166
6	28	1.52829	0.663112
7	28	1.49658	0.753724
8	28		0.728069	0.0145816
9	28	1.24472	0.643555
10	28	1.67686	0.628561
11	28	1.9369	0.756513
12	28	1.48499	0.881307	0.0172445
13	28	1.79621	0.843711	0.0139424
14	28	1.70783	0.702218	0.0169788
15	28	1.75114	0.749888	0.016571
16	28	1.83944	0.735429	0.0149558
17	28	1.38103	0.649627	0.0174562
18	28	1.56724	0.965069	0.016669
19	28	1.32356	0.957328	0.0201167
20	28	1.55576	0.849418	0.0162785
21	28	1.83578	0.872966	0.0227207
22	28	1.36668	0.96546	0.0176587
23	28	1.58822	0.88832	0.02168
24	28	1.34115	1.07322	0.0176908
25	28		0.868371	0.0190054
26	28	1.64411	0.861658	0.020456
27	28	1.41231	0.980868	0.0195771
28	28	1.35359	0.910958	0.0201815
29	28		0.851288	0.0244629
30	28	1.46632	0.935374	0.0189062
31	28	1.63519	0.861764	0.0215222
32	28	1.24002	1.03904	0.0186964
33	28	1.3173	1.04727	0.0255023
34	28	1.46661	1.02181	0.0232595
35	28	1.58562	1.04225	0.0264217
36	28	1.44625	1.11249	0.0257808
37	28	1.44282	0.956291	0.02626
38	28	1.33045	1.0189	0.0206787
39	28	1.39432	1.33905	0.0217835
40	28	1.2539	1.0372	0.0237324
41	28	1.35272	0.86898	0.0204774
42	28	1.41615	0.772263	0.021122
43	28	1.25179	0.727405	0.0202864
44	28		0.449056	0.0150323
45	28		0.392373
46	28
47	28
48	28			0.0157151
0	29	1.38322	0.579023
1	29	1.55242	0.73975
2	29	1.49783	0.668055
3	29	1.25096	0.549522
4	29	1.63292	0.604738	0.0142224
5	29	1.30917	0.526541	0.0143618
6	29		0.589542
7	29	1.67412	0.905727
8	29	1.62816	0.588675	0.0161574
9	29	1.53138	0.670877	0.0168767
10	29	1.59668	0.696191
11	29	1.47159	0.758949	0.0142602
12	29	1.67985	0.744371	0.0140585
13	29	1.43524	0.661674	0.0139769
14	29	1.56585	0.719634	0.0155721
15	29	1.35623	0.595579	0.0169789
16	29	1.73457	0.790669	0.0154743
17	29	1.57647	0.879359	0.0210589
18	29	1.54152	0.828728	0.0157865
19	29	1.53328	0.921742	0.0169143
20	29	1.63833	0.976524	0.0193441
21	29	1.74106	1.10819	0.0151559
22	29	1.39128	0.873464	0.0189507
23	29	1.37103	0.86221	0.0208155
24	29	1.51205	1.03351	0.0173041
25	29	1.56299	0.865454	0.0185989
26	29	1.44478	1.03649	0.0190755
27	29	1.20812	0.816243	0.0204231
28	29	1.32825	0.970295	0.0199735
29	29	1.70821	0.881836	0.0249261
30	29	1.64281	1.10846	0.0204884
31	29	1.54772	0.825234	0.0200766
32	29	1.25277	0.872114	0.0200104
33	29	1.49124	0.956071	0.0218879
34	29	1.25769	0.943922	0.0252645
35	29	1.45037	1.09847	0.0204187
36	29	1.17854	0.915179	0.0221102
37	29	1.4151	1.1067	0.0277672
38	29	1.77386	0.837763	0.0310564
39	29	1.46289	1.02102	0.0230449
40	29	1.23846	0.924702	0.0232845
41	29		0.75882	0.0275361
42	29	1.42795	0.665573	0.0174214
43	29	1.20037	0.637361	0.0158119
44	29			0.0177614
45	29		0.395488
46	29			0.0169729
47	29
48	29
0	30	1.37088	0.521024	0.0158541
1	30	1.33887	0.698128	0.0153791
2	30	1.24671	0.630596
3	30	1.64984	0.694333	0.0144644
4	30	1.45666	0.630957
5	30	1.36915	0.691128
6	30	1.60913	0.766343	0.0161904
7	30	1.61742	0.713976	0.014422
8	30	1.63348	0.883633	0.014909
9	30	1.61899	0.8317
10	30	1.53037	0.811407	0.0161111
11	30	1.79823	0.713062
12	30	1.49604	0.790273
13	30	1.68858	0.938318
14	30	1.6929	0.667561	0.0158001
15	30	1.95185	0.817703	0.0137949
16	30	1.51815	0.594041	0.0138028
17	30	1.57175	0.658431	0.0189072
18	30	1.94306	0.875456	0.015819
19	30	1.5302	0.7863	0.0181299
20	30	1.66723	0.957298	0.0248223
21	30	1.38667	1.05896	0.0196226
22	30	1.30196	0.692893	0.01717
23	30	1.37728	1.10244	0.0210093
24	30	1.39737	0.917903	0.0158418
25	30	1.29175	1.02212	0.0194429
26	30	1.37818	1.0115	0.021065
27	30	1.42686	0.913976	0.0205956
28	30	1.17352	1.02839	0.0225586
29	30	1.18183	1.03126	0.0205682
30	30	1.40808	0.911753	0.0151708
31	30	1.24442	1.05489	0.0223364
32	30	1.228	1.06281	0.0193504
33	30	1.39196	1.10523	0.0219405
34	30	1.33599	1.19725	0.0242672
35	30	1.37197	1.2046	0.0224176
36	30	1.66053	1.17093	0.0228111
37	30	1.58909	1.19496	0.028169
38	30		1.04558	0.0288159
39	30	1.37814	1.07738	0.0186974
40	30	1.22787	0.869018	0.023916
41	30		0.749372	0.0170522
42	30		0.547796
43	30		0.419524	0.0183818
44	30		0.386098
45	30
46	30			0.0139046
47	30
48	30
0	31	1.51654	0.406304
1	31	1.45157	0.486298	0.0138565
2	31	1.59689	0.610251
3	31	1.3514	0.748821
4	31	1.57761	0.646371	0.0162534
5	31	1.52305	0.770815
6	31	1.60797	0.759847	0.0171277
7	31	1.50089	0.65343	0.0150546
8	31	1.4916	0.597197
9	31	1.58115	0.686359
10	31	1.55589	0.722732
11	31	1.37311	0.668775	0.0144462
12	31	1.61714	0.813636	0.0153743
13	31	1.59627	0.829727
14	31	1.50212	0.851299
15	31	1.85776	0.886837	0.0148939
16	31	1.37222	0.732134	0.016109
17	31	1.41425	0.915072	0.0157933
18	31	1.42594	1.01757	0.0177656
19	31	1.59401	0.829885	0.0185703
20	31	1.45463	1.0005	0.0193246
21	31	1.52548	0.790822	0.0182932
22	31	1.27032	1.08912	0.0216807
23	31		1.00925	0.0165934
24	31		0.928521	0.0207331
25	31	1.20681	1.13756	0.0206652
26	31		0.979837	0.0192789
27	31	1.22449	1.04022	0.0185005
28	31	1.56122	0.880004	0.0209095
29	31	1.32898	0.942445	0.0200536
30	31		1.01078	0.0243441
31	31	1.60271	0.823588	0.0238467
32	31	1.30961	1.11124	0.0225464
33	31	1.4617	1.06402	0.0232774
34	31	1.49204	1.08523	0.0236395
35	31	1.29588	1.29211	0.0237452
36	31	1.27274	1.22605	0.023585
37	31		1.10951	0.0230237
38	31	1.45914	0.936244	0.0259742
39	31	1.57388	1.12264	0.0237831
40	31		0.861112	0.0227877
41	31		0.841371	0.0143742
42	31		0.645189
43	31		0.428481
44	31		0.396648
45	31
46	31
47	31
48	31
0	32	1.25266	0.513057
1	32	1.31969	0.534904	0.0145036
2	32	1.20131	0.492093	0.0149686
3	32	1.60232	0.578908
4	32	1.58396	0.665387	0.0165329
5	32	1.52151	0.766776
6	32	1.64572	0.697692
7	32	1.37364	0.769779	0.0156561
8	32	1.33702	0.713998
9	32	1.44757	0.669763
10	32	1.50271	0.771315
11	32	1.51202	0.744384	0.0150394
12	32	1.67438	0.765428
13	32	1.95564	0.828543	0.0140329
14	32	1.53519	0.806343
15	32	1.71775	0.887937
16	32	1.99321	0.800325	0.0148201
17	32	1.59201	0.804719	0.0178233
18	32	1.55302	0.897384	0.0164645
19	32	1.39999	0.969641	0.0193128
20	32	1.27254	0.876674	0.0190788
21	32	1.34902	0.880759	0.017758
22	32	1.41805	1.14258	0.0168399
23	32	1.34914	1.0876	0.0210477
24	32		0.808641	0.0170484
25	32	1.30524	0.747922	0.0192555
26	32	1.21483	1.03566	0.0215118
27	32	1.28662	0.770254	0.0199657
28	32	1.52153	1.04258	0.0187499
29	32	1.36592	1.17666	0.0236208
30	32		1.25749	0.0187504
31	32	1.33897	1.10209	0.0241946
32	32	1.35298	0.920888	0.0226359
33	32	1.29507	0.981824	0.0220544
34	32	1.36064	1.12331	0.0227348
35	32		1.06521	0.0227249
36	32	1.7473	0.978852	0.0239886
37	32	1.45016	0.982322	0.0203099
38	32	1.65423	0.813182	0.0262919
39	32	1.30069	0.910251	0.0231432
40	32	1.3073	1.00799	0.0215435
41	32	1.17614	0.815588	0.0193177
42	32		0.519512	0.01548
43	32		0.506014	0.0174495
44	32
45	32
46	32
47	32
48	32
0	33		0.620455
1	33	1.49874	0.607749
2	33	1.62379	0.568628
3	33	1.51459	0.721165	0.0159843
4	33	1.37914	0.571679	0.0162001
5	33	1.46151	0.750594
6	33	1.41604	0.904705
7	33	1.4667	0.634643
8	33	1.54809	0.746226	0.0167659
9	33	1.65569	0.825972
10	33	1.47537	0.736803	0.0177111
11	33	1.65047	0.702407	0.0157395
12	33	1.57885	0.759214	0.018526
13	33	1.96274	0.650156	0.015931
14	33	1.48201	1.10585
15	33	1.83663	0.720778	0.0162988
16	33	1.45127	1.01719	0.0171495
17	33	1.73094	0.878382	0.0204999
18	33	1.65195	0.85486	0.016498
19	33	1.39649	0.986171	0.0227195
20	33	1.52114	0.924565	0.0194636
21	33		1.20944	0.0178432
22	33	1.47201	0.901126	0.0210422
23	33	1.36358	0.940218	0.0177087
24	33	1.35804	0.834085	0.0201081
25	33	1.37469	0.87427	0.0160369
26	33	1.53977	0.919284	0.0171718
27	33		0.697932	0.025386
28	33	1.26293	0.954081	0.0177003
29	33	1.38772	0.957512	0.0254872
30	33	1.53816	0.892782	0.0244913
31	33	1.45252	0.872589	0.0200138
32	33	1.26041	1.12557	0.0221601
33	33		1.0756	0.0214481
34	33	1.46786	1.09006	0.0265832
35	33	1.48218	1.24082	0.0214895
36	33	1.65218	1.08545	0.0265438
37	33	1.38329	0.994954	0.0194573
38	33	1.21606	0.972979	0.020852
39	33	1.62116	0.961201	0.0227916
40	33	1.3268	0.903735	0.0151527
41	33	1.25914	0.519997	0.0150944
42	33		0.495549	0.0144912
43	33		0.427532
44	33
45	33
46	33
47	33
48	33
0	34	1.19744	0.454209
1	34	1.57648	0.538869
2	34	1.46946	0.56308	0.0141714
3	34	1.53925	0.610998
4	34	1.41258	0.921973
5	34	1.42406	0.552433	0.0153255
6	34	1.27692	0.60052
7	34	1.17462	0.810239	0.0187131
8	34	1.50832	0.550197	0.0157413
9	34	1.42433	0.667384	0.0165937
10	34	1.48316	0.82024	0.0148421
11	34	1.68644	0.72289	0.0174709
12	34	1.93229	0.87649
13	34	1.95071	0.856016	0.0166
14	34	1.80813	0.821605	0.017571
15	34	1.66453	0.809256	0.0195244
16	34	1.19228	0.919011	0.0150343
17	34	1.49529	0.890511	0.016658
18	34	1.71539	1.08023	0.0172359
19	34	1.5251	0.93987	0.0173012
20	34	1.22392	0.797975	0.0232128
21	34	1.22381	0.884441	0.0190308
22	34	1.50712	1.03716
23	34	1.22186	0.949881	0.0197116
24	34	1.55471	1.06497	0.0227422
25	34	1.21104	1.00849	0.0157287
26	34	1.23912	1.02177	0.0205878
27	34		0.737273	0.0180374
28	34		0.905408	0.0222993
29	34	1.60112	1.10044	0.0236954
30	34	1.42407	0.93264	0.0187743
31	34	1.63707	1.14561	0.0214359
32	34		0.989331	0.0240247
33	34	1.43793	1.07872	0.0230547
34	34		1.10484	0.024294
35	34		0.86789	0.0219607
36	34	1.75796	1.0749	0.0226526
37	34	1.50738	0.983777	0.0223889
38	34	1.4011	0.954771	0.0255262
39	34	1.46449	0.99398	0.0232503
40	34		0.738686	0.016307
41	34		0.508462	0.0149589
42	34		0.401002	0.0145994
43	34
44	34
45	34
46	34
47	34
48	34
0	35		0.512932
1	35	1.59023	0.53489
2	35	1.30079	0.473972
3	35		0.515912
4	35	1.43257	0.547235
5	35	1.48264	0.518573	0.0140097
6	35	1.60462	0.652048	0.0181492
7	35	1.69218	0.69813
8	35	1.52012	0.713537	0.0140827
9	35	1.30681	0.866356	0.01431
10	35	1.57084	0.787145
11	35	1.38551	0.833486	0.0144903
12	35	1.4322	0.906322	0.0154137
13	35	1.65657	0.908571	0.015844
14	35	1.59353	0.881901	0.0166956
15	35	1.78549	0.66669	0.0164814
16	35	1.55678	0.752809	0.0185506
17	35	1.31331	0.765486	0.0155838
18	35	1.38718	0.99972	0.0182784
19	35		0.844275	0.0210061
20	35	1.33795	1.02031	0.0140218
21	35		1.07944	0.0182414
22	35		1.06697	0.0175708
23	35	1.35826	1.02383	0.0207538
24	35	1.49292	0.821207	0.0186033
25	35	1.22562	1.05514	0.0246373
26	35		0.794365	0.0233531
27	35	1.18823	0.979289	0.0230939
28	35		0.904073	0.0203598
29	35	1.24162	1.04656	0.0214775
30	35	1.23137	1.23934	0.0224433
31	35	1.20709	0.976526	0.0228572
32	35		1.00615	0.0272095
33	35	1.36227	1.0663	0.0188821
34	35	1.33654	1.10347	0.0259101
35	35	1.33711	1.08162	0.0251349
36	35	1.19901	1.09363	0.0236703
37	35	1.64308	0.812277	0.0204745
38	35		0.879441	0.0169971
39	35		0.745255	0.0171446
40	35		0.606076
41	35		0.488627	0.0140907
42	35		0.465274
43	35		0.385168
44	35
45	35
46	35
47	35
48	35
0	36	1.39723	0.519708	0.0142472
1	36		0.488543
2	36		0.563201
3	36	1.21541	0.591172
4	36	1.22158	0.70462	0.014701
5	36	1.5435	0.853373
6	36	1.36782	0.881164	0.0175944
7	36	1.24294	0.729833	0.0169071
8	36	1.5903	0.756019	0.0158595
9	36	1.6183	0.837752
10	36	1.38475	0.787345	0.0167436
11	36	1.95249	0.8342	0.0157463
12	36	1.72242	0.768685
13	36	1.62416	0.624673	0.0174071
14	36	1.72718	0.762582
15	36	1.34264	0.993548	0.0151873
16	36	1.23822	0.870312	0.0149124
17	36	1.53736	0.806952	0.0172208
18	36		1.1723	0.0229039
19	36	1.52085	0.923835	0.0196243
20	36	1.63259	1.0822	0.0217437
21	36	1.43217	0.986687	0.0176439
22	36		1.0344	0.0215066
23	36		0.821672	0.0233577
24	36		1.2205	0.0182341
25	36	1.26297	1.02009	0.0202339
26	36	1.39085	0.862795	0.0238393
27	36	1.49587	0.848114	0.0167773
28	36	1.37123	1.05571	0.0183469
29	36	1.48142	0.777304	0.0213684
30	36	1.17453	0.855084	0.0171
31	36	1.63942	0.995141	0.0228521
32	36		1.18144	0.0272622
33	36	1.27573	0.959861	0.0201966
34	36		0.758552	0.0227212
35	36	1.25748	0.990389	0.0232128
36	36		0.856136	0.0173136
37	36	1.20989	0.898352	0.0209589
38	36		0.695952	0.0156734
39	36		0.587146	0.0160947
40	36	1.28112	0.533526	0.0165612
41	36		0.465083
42	36		0.369954	0.0145028
43	36
44	36
45	36
46	36
47	36
48	36
0	37	1.17195	0.538832
1	37	1.37044	0.572123
2	37	1.50128	0.461954
3	37	1.38285	0.730235
4	37		0.637621
5	37	1.2474	0.52563	0.0169542
6	37	1.36945	0.616898	0.0139353
7	37	1.55462	0.635026
8	37	1.68356	0.735247
9	37	1.49363	0.908055	0.0141774
10	37	1.43278	0.766581	0.0144896
11	37	1.69946	0.864636	0.015858
12	37	1.6188	0.875299	0.0180533
13	37	1.7575	0.808236	0.0160746
14	37	1.62722	0.708797	0.014674
15	37	1.79901	0.697788	0.0141927
16	37	1.54848	0.9473	0.0166643
17	37	1.52863	0.789661	0.0141791
18	37	1.4957	0.87294	0.0213184
19	37	1.29221	0.96617	0.0172021
20	37	1.32065	0.918378	0.0205767
21	37	1.17541	0.835687	0.0207093
22	37	1.33366	0.987753	0.0215432
23	37		1.05152	0.0182776
24	37	1.27558	0.961107	0.0174813
25	37	1.37332	0.982219	0.0217816
26	37		1.07308	0.0189969
27	37	1.29859	1.10281	0.0189592
28	37	1.19093	0.900702	0.0176324
29	37	1.52771	1.04386	0.0226219
30	37	1.36158	1.04883	0.0235538
31	37	1.60822	1.0029	0.0218562
32	37	1.3178	1.05121	0.0252187
33	37	1.3268	1.09057	0.0251008
34	37	1.31534	1.1754	0.0208288
35	37	1.3268	1.17746	0.0188668
36	37	1.23936	0.825475	0.0198752
37	37		0.761516	0.0184984
38	37		0.483053	0.0154967
39	37		0.511028	0.0170822
40	37		0.593221
41	37		0.449636
42	37
43	37
44	37
45	37
46	37
47	37
48	37
0	38		0.580193
1	38	1.17118	0.459904
2	38		0.591703	0.0139666
3	38		0.668713
4	38	1.19282	0.558404
5	38	1.40189	0.628801	0.0140833
6	38	1.17184	0.9559	0.0150211
7	38	1.28508	0.846024	0.015604
8	38	1.19618	0.720264
9	38	1.24717	0.80949
10	38	1.28405	0.796036
11	38	1.44003	0.808837
12	38	1.49388	0.779082	0.0172666
13	38	1.74992	0.900353	0.0167434
14	38	1.71936	0.797868	0.0140294
15	38	1.54425	0.774908	0.0189008
16	38	1.46724	0.796488	0.0183972
17	38	1.36659	1.05854	0.0189814
18	38	1.49991	0.798849	0.0197428
19	38	1.45279	0.914221	0.0191345
20	38	1.31579	0.88982	0.022089
21	38	1.24129	0.913047	0.0204704
22	38	1.41552	0.937542	0.0202967
23	38	1.5799	0.811466	0.0189407
24	38		1.00163	0.0178413
25	38	1.25275	1.19552	0.0218392
26	38		0.878304	0.0250701
27	38	1.44715	1.15249	0.018599
28	38	1.33405	0.988028	0.0242658
29	38		0.954135	0.0253303
30	38	1.19202	1.10706	0.0253486
31	38		0.962626	0.0223301
32	38	1.31939	0.880734	0.0260739
33	38	1.54194	0.935741	0.0219401
34	38		0.942907	0.0206871
35	38	1.39828	0.90974	0.0224117
36	38	1.32122	0.900533	0.0180428
37	38	1.17411	0.724677	0.0167345
38	38		0.620425	0.0156785
39	38		0.54463
40	38		0.415679	0.0143692
41	38		0.401439
42	38
43	38
44	38
45	38
46	38
47	38
48	38
0	39	1.34253
1	39		0.611098
2	39		0.462115
3	39	1.33751	0.655132	0.0149627
4	39	1.19767	0.717331
5	39	1.35718	0.680065
6	39	1.28266	0.810531	0.0177813
7	39	1.27777	0.817237	0.0140016
8	39	1.62315	0.636465	0.0145996
9	39	1.32988	0.814979	0.0139154
10	39	1.549	0.844759	0.0139119
11	39	1.27389	0.795324	0.0172078
12	39	1.68417	0.811377	0.0163813
13	39	1.79669	1.02396	0.0139641
14	39	1.39036	0.780131	0.019103
15	39	1.6845	0.986852	0.0166135
16	39	1.38063	0.860748	0.0184369
17	39	1.41644	0.982347	0.0201329
18	39	1.6501	1.01541	0.016256
19	39	1.51206	0.871221	0.0195548
20	39	1.21733	1.18054	0.0212661
21	39		0.950176	0.0203716
22	39	1.47682	0.85897	0.0203939
23	39	1.31997	1.21198	0.0232867
24	39	1.46177	0.91404	0.0228467
25	39		0.916705	0.0196007
26	39	1.51286	1.16015	0.0194033
27	39	1.41241	1.03191	0.0233837
28	39	1.25967	0.959938	0.0214252
29	39	1.25311	1.02188	0.0211781
30	39		1.13037	0.0196027
31	39	1.23434	1.11921	0.0265844
32	39	1.49472	1.03654	0.023762
33	39	1.37133	0.942693	0.0223528
34	39	1.47985	0.94915	0.020794
35	39		0.928489	0.0229961
36	39		1.01074	0.0168977
37	39		0.740959	0.0153076
38	39		0.451577	0.0152602
39	39		0.483008	0.0169221
40	39		0.548289	0.0138095
41	39		0.385786
42	39
43	39
44	39
45	39
46	39
47	39
48	39
0	40		0.577367
1	40	1.61608	0.569309
2	40	1.4513	0.609043
3	40	1.3244	0.587567
4	40	1.33987	0.616436	0.0164401
5	40	1.58448	0.592308	0.016173
6	40	1.7301	0.785439	0.0185452
7	40	1.38706	0.585012
8	40	1.86824	0.768966	0.0149164
9	40	1.64179	0.711865	0.0185009
10	40	1.42566	0.7871	0.0158408
11	40		0.772781	0.0183027
12	40	1.42387	0.781747	0.0162218
13	40	1.5879	0.994015	0.0189432
14	40	1.62263	0.804022	0.0203027
15	40	1.47059	1.05712	0.0208339
16	40	1.43329	0.730159	0.0189309
17	40	1.36461	0.834006	0.0148267
18	40	1.22725	1.00157	0.0208552
19	40	1.62831	0.878107	0.0220448
20	40		0.713928	0.0177337
21	40		1.01454	0.0237489
22	40	1.40808	0.889153	0.0231729
23	40	1.21887	1.01022	0.0231548
24	40	1.49717	0.868115	0.0176303
25	40	1.22095	1.11903	0.0179366
26	40		0.8188	0.0210807
27	40	1.21123	1.00659	0.0233619
28	40	1.26993	0.879906	0.0234323
29	40	1.60582	1.08378	0.0239315
30	40	1.3121	1.11641	0.0228237
31	40	1.24485	1.13771	0.0269658
32	40	1.23282	1.05234	0.025786
33	40	1.27672	1.02516	0.0225565
34	40	1.31736	1.05436	0.0200677
35	40	1.29341	0.809602	0.0178285
36	40	1.48451	0.782218	0.015886
37	40		0.751032	0.0157571
38	40		0.566521
[truncated: 1,137 more rows]
