# Supplementary figures and images for: Correlating STED and synchrotron XRF nano-imaging unveils cosegregation of metals and cytoskeleton proteins in dendrites
Source: eLife journal article supplement (doi:10.7554/elife.62334), 2020-12-08

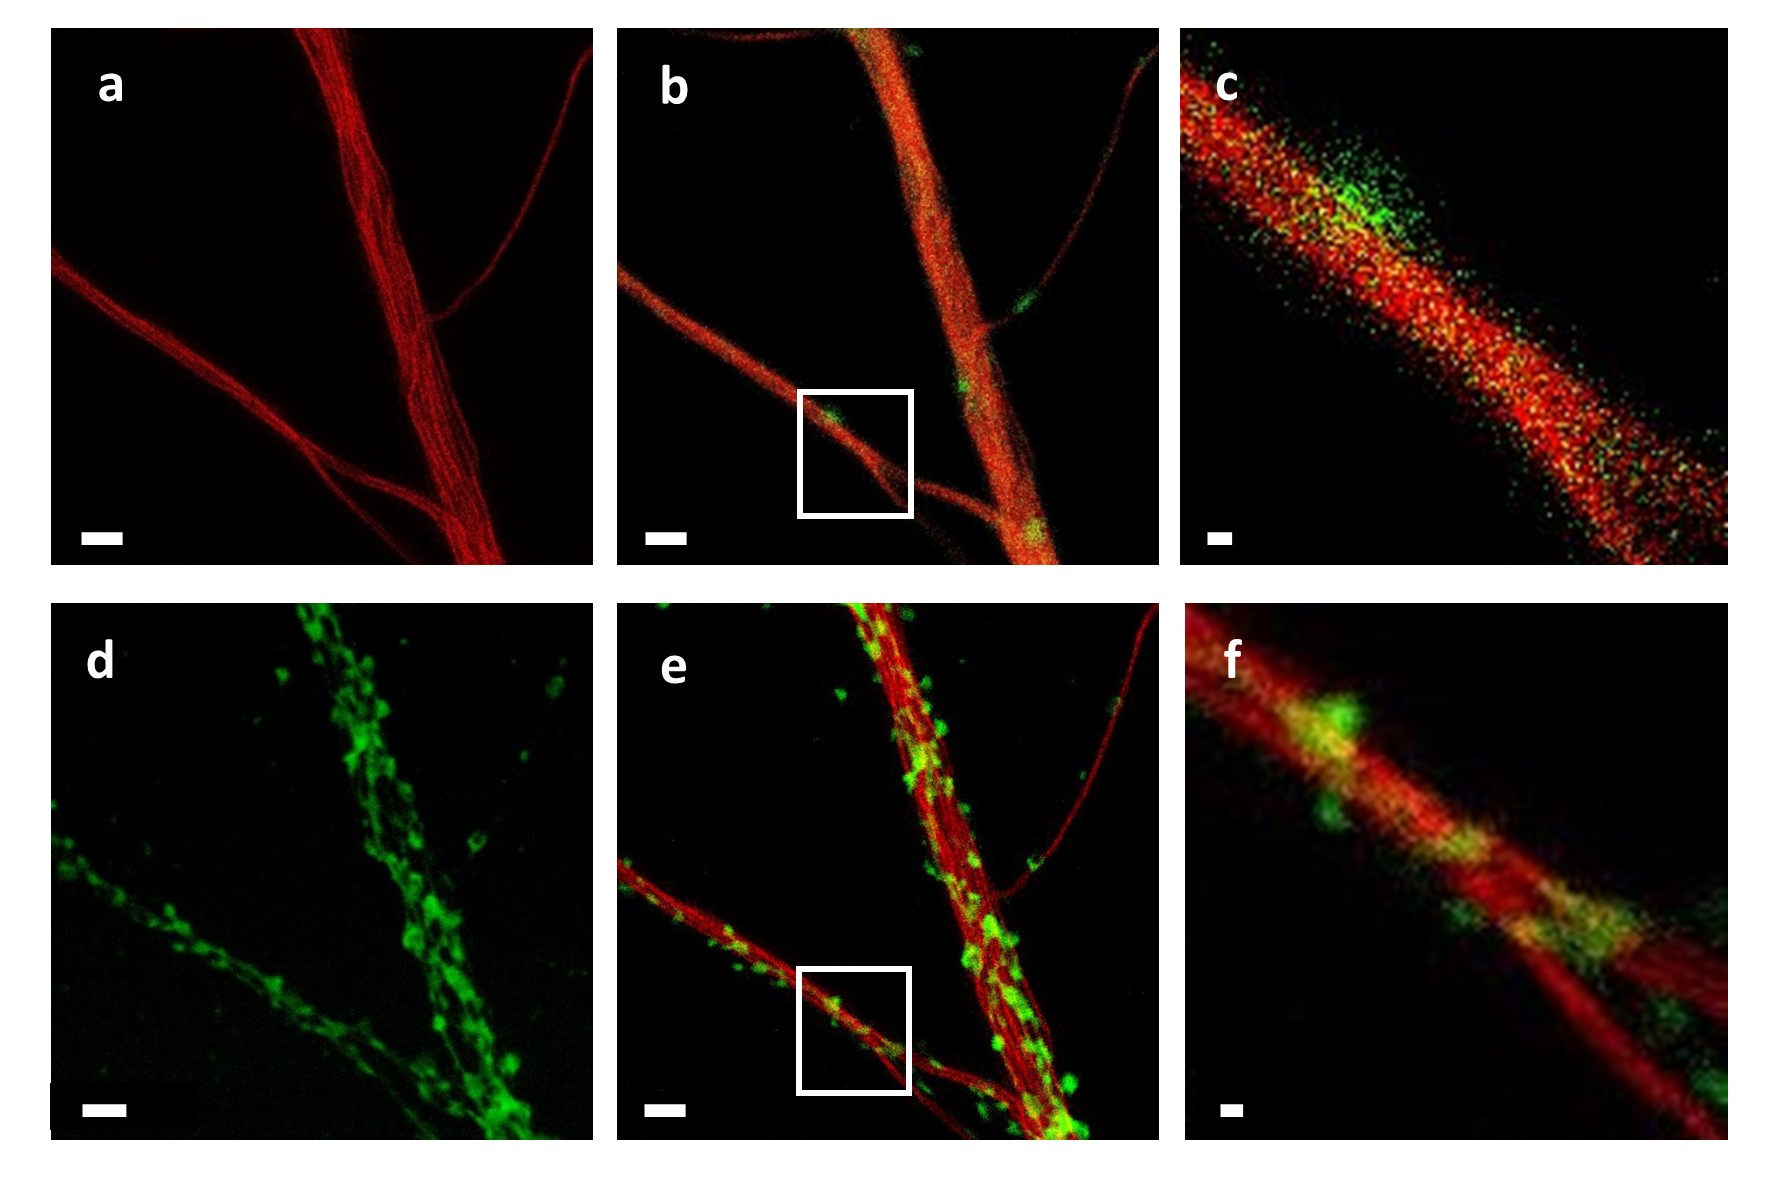

Supplement: supp [file elife-62334-supp-v1.zip › elife_poa_e62334_Figure_1_figure_supplement_1.jpg]

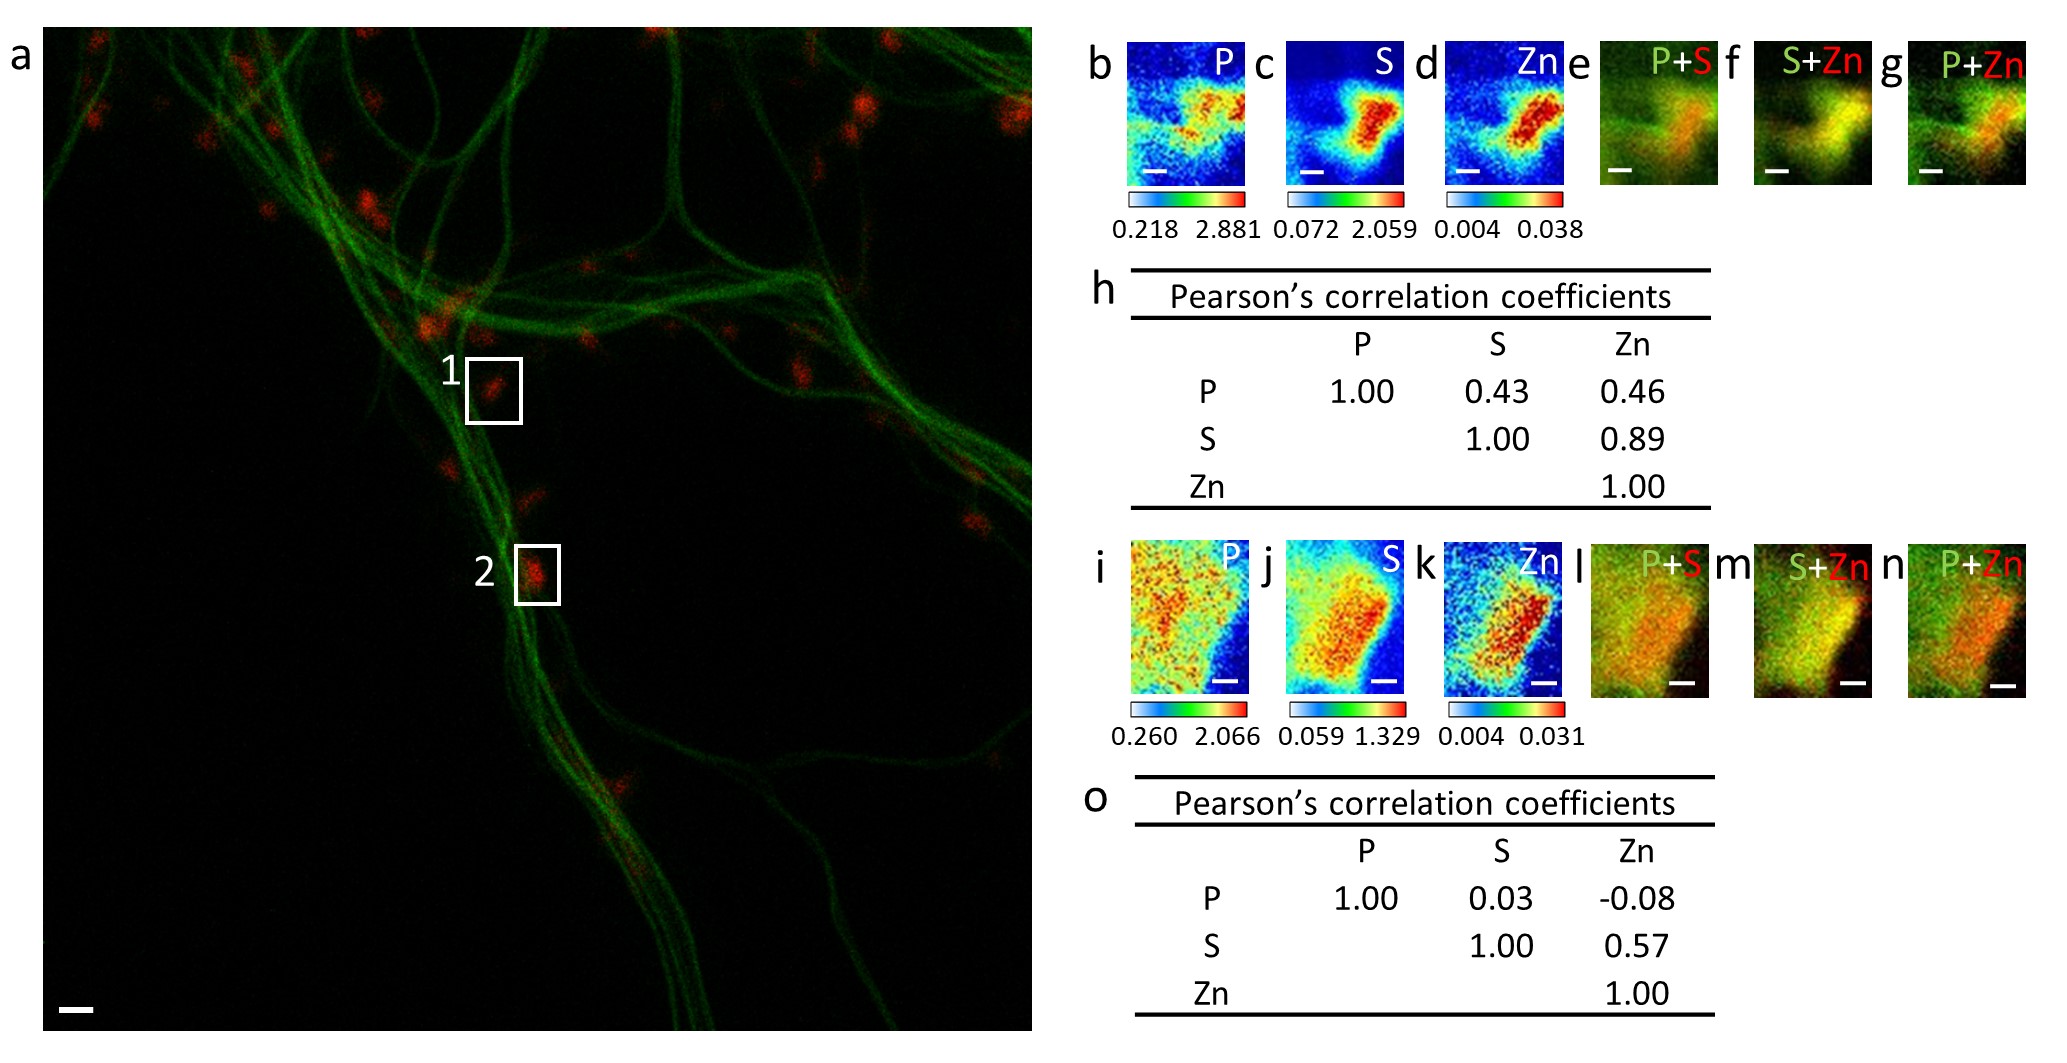

Supplement: supp [file elife-62334-supp-v1.zip › elife_poa_e62334_Figure_2_figure_supplement_1.jpg]

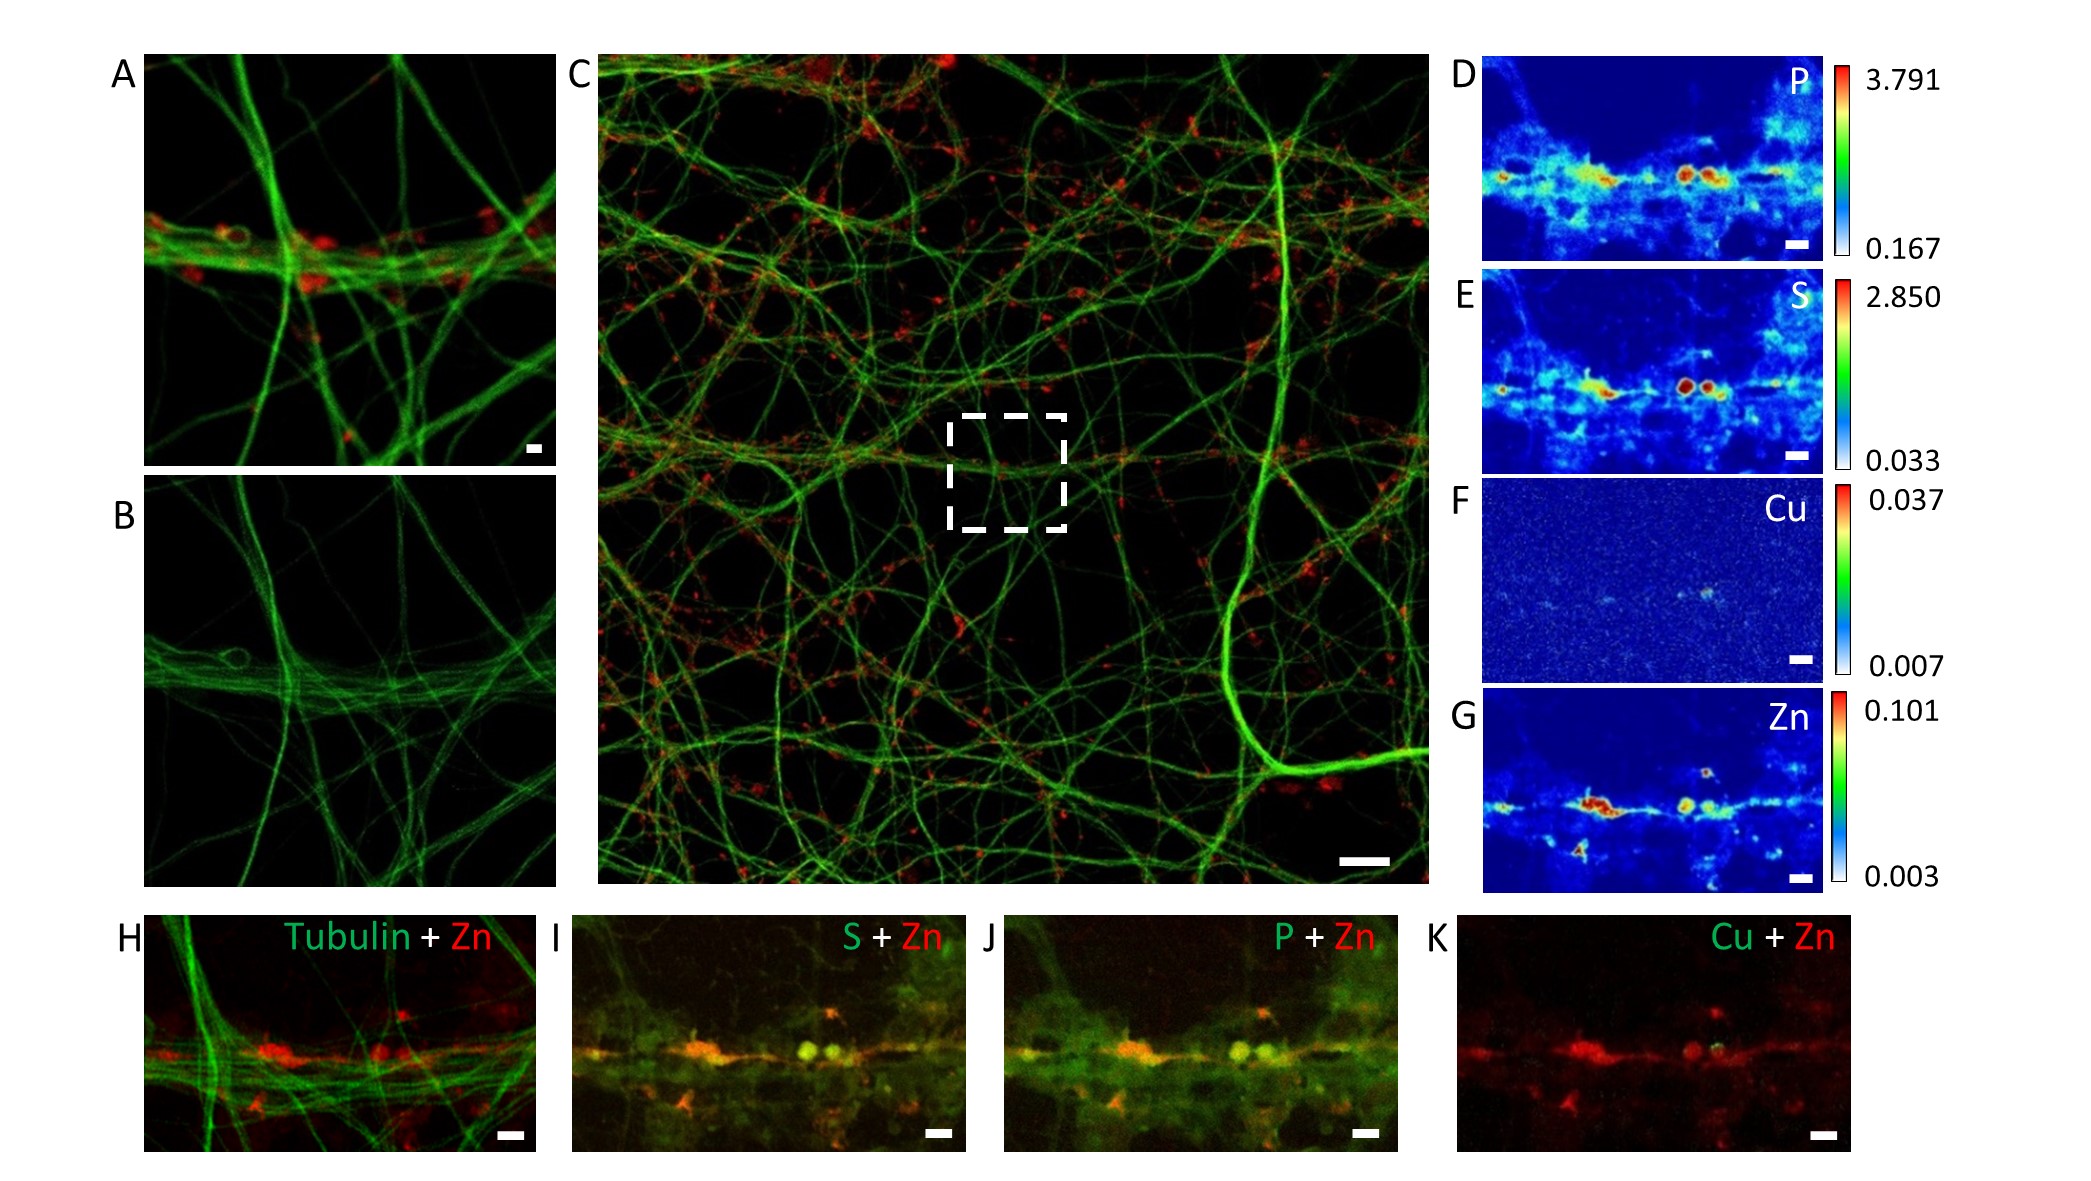

Supplement: supp [file elife-62334-supp-v1.zip › elife_poa_e62334_Figure_3_figure_supplement_1.jpg]

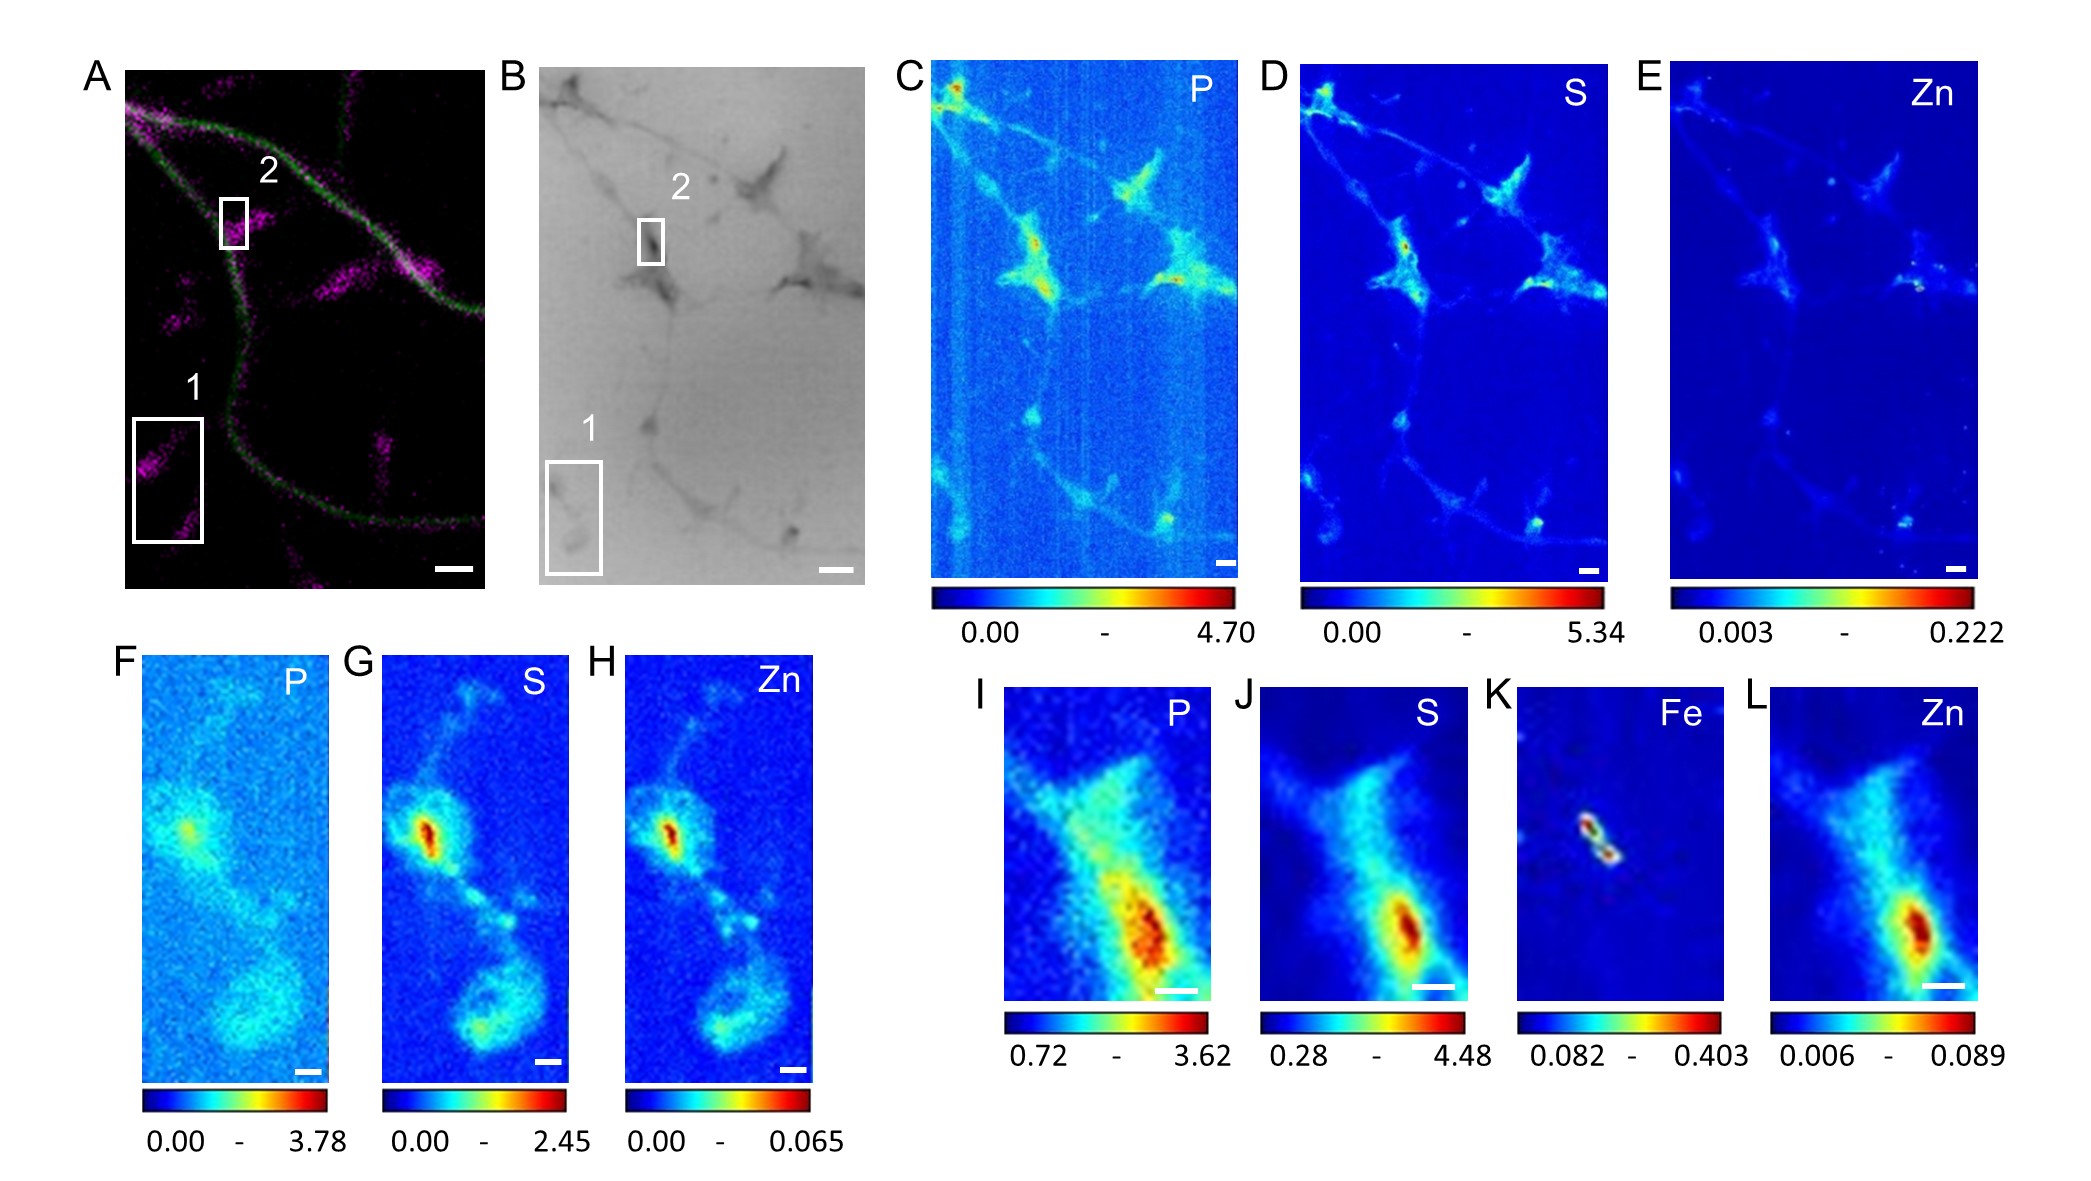

Supplement: supp [file elife-62334-supp-v1.zip › elife_poa_e62334_Figure_4_figure_supplement_1.jpg]

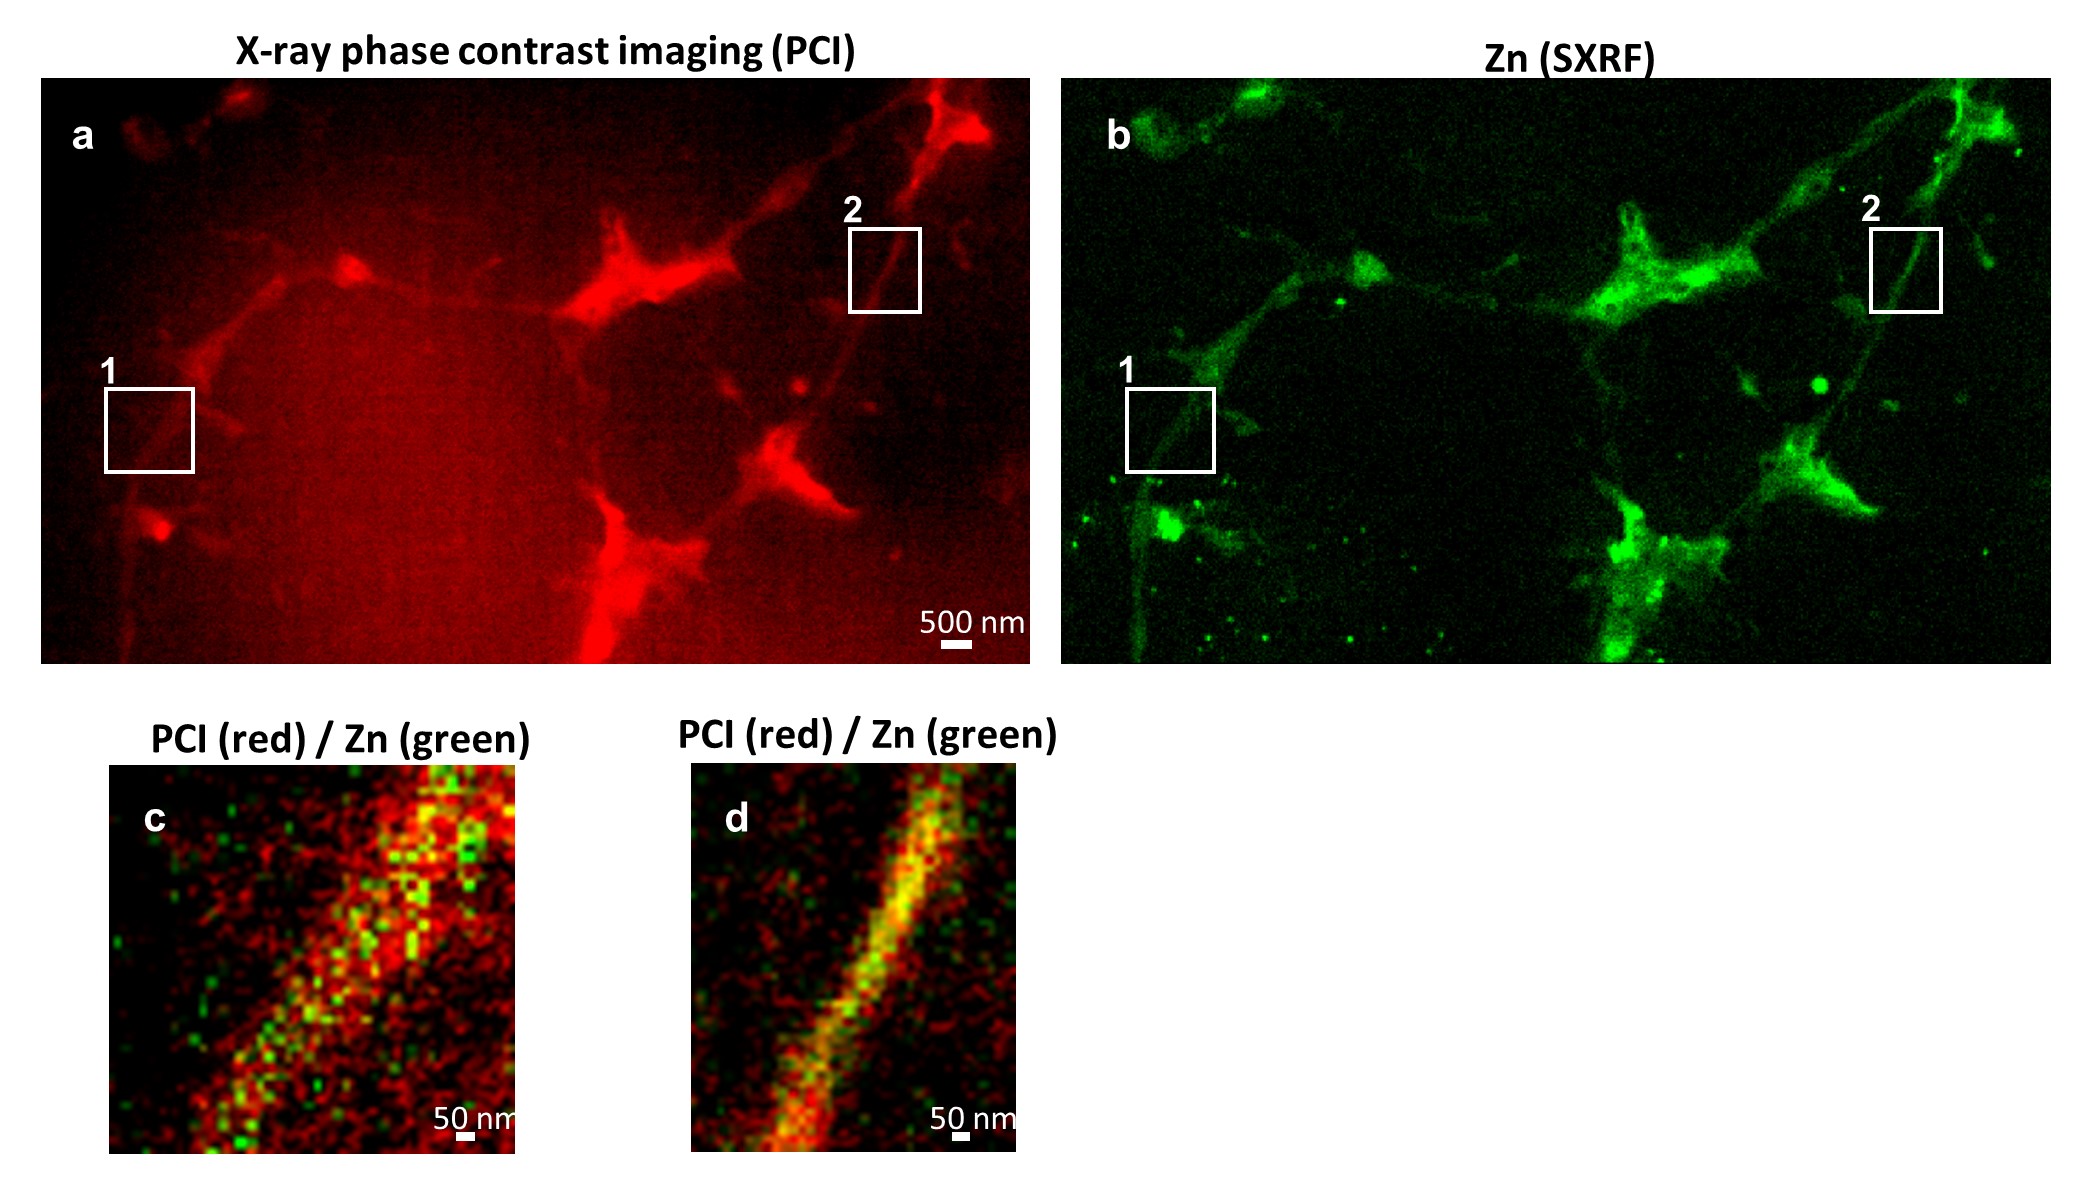

Supplement: supp [file elife-62334-supp-v1.zip › elife_poa_e62334_Figure_5_figure_supplement_1.jpg]

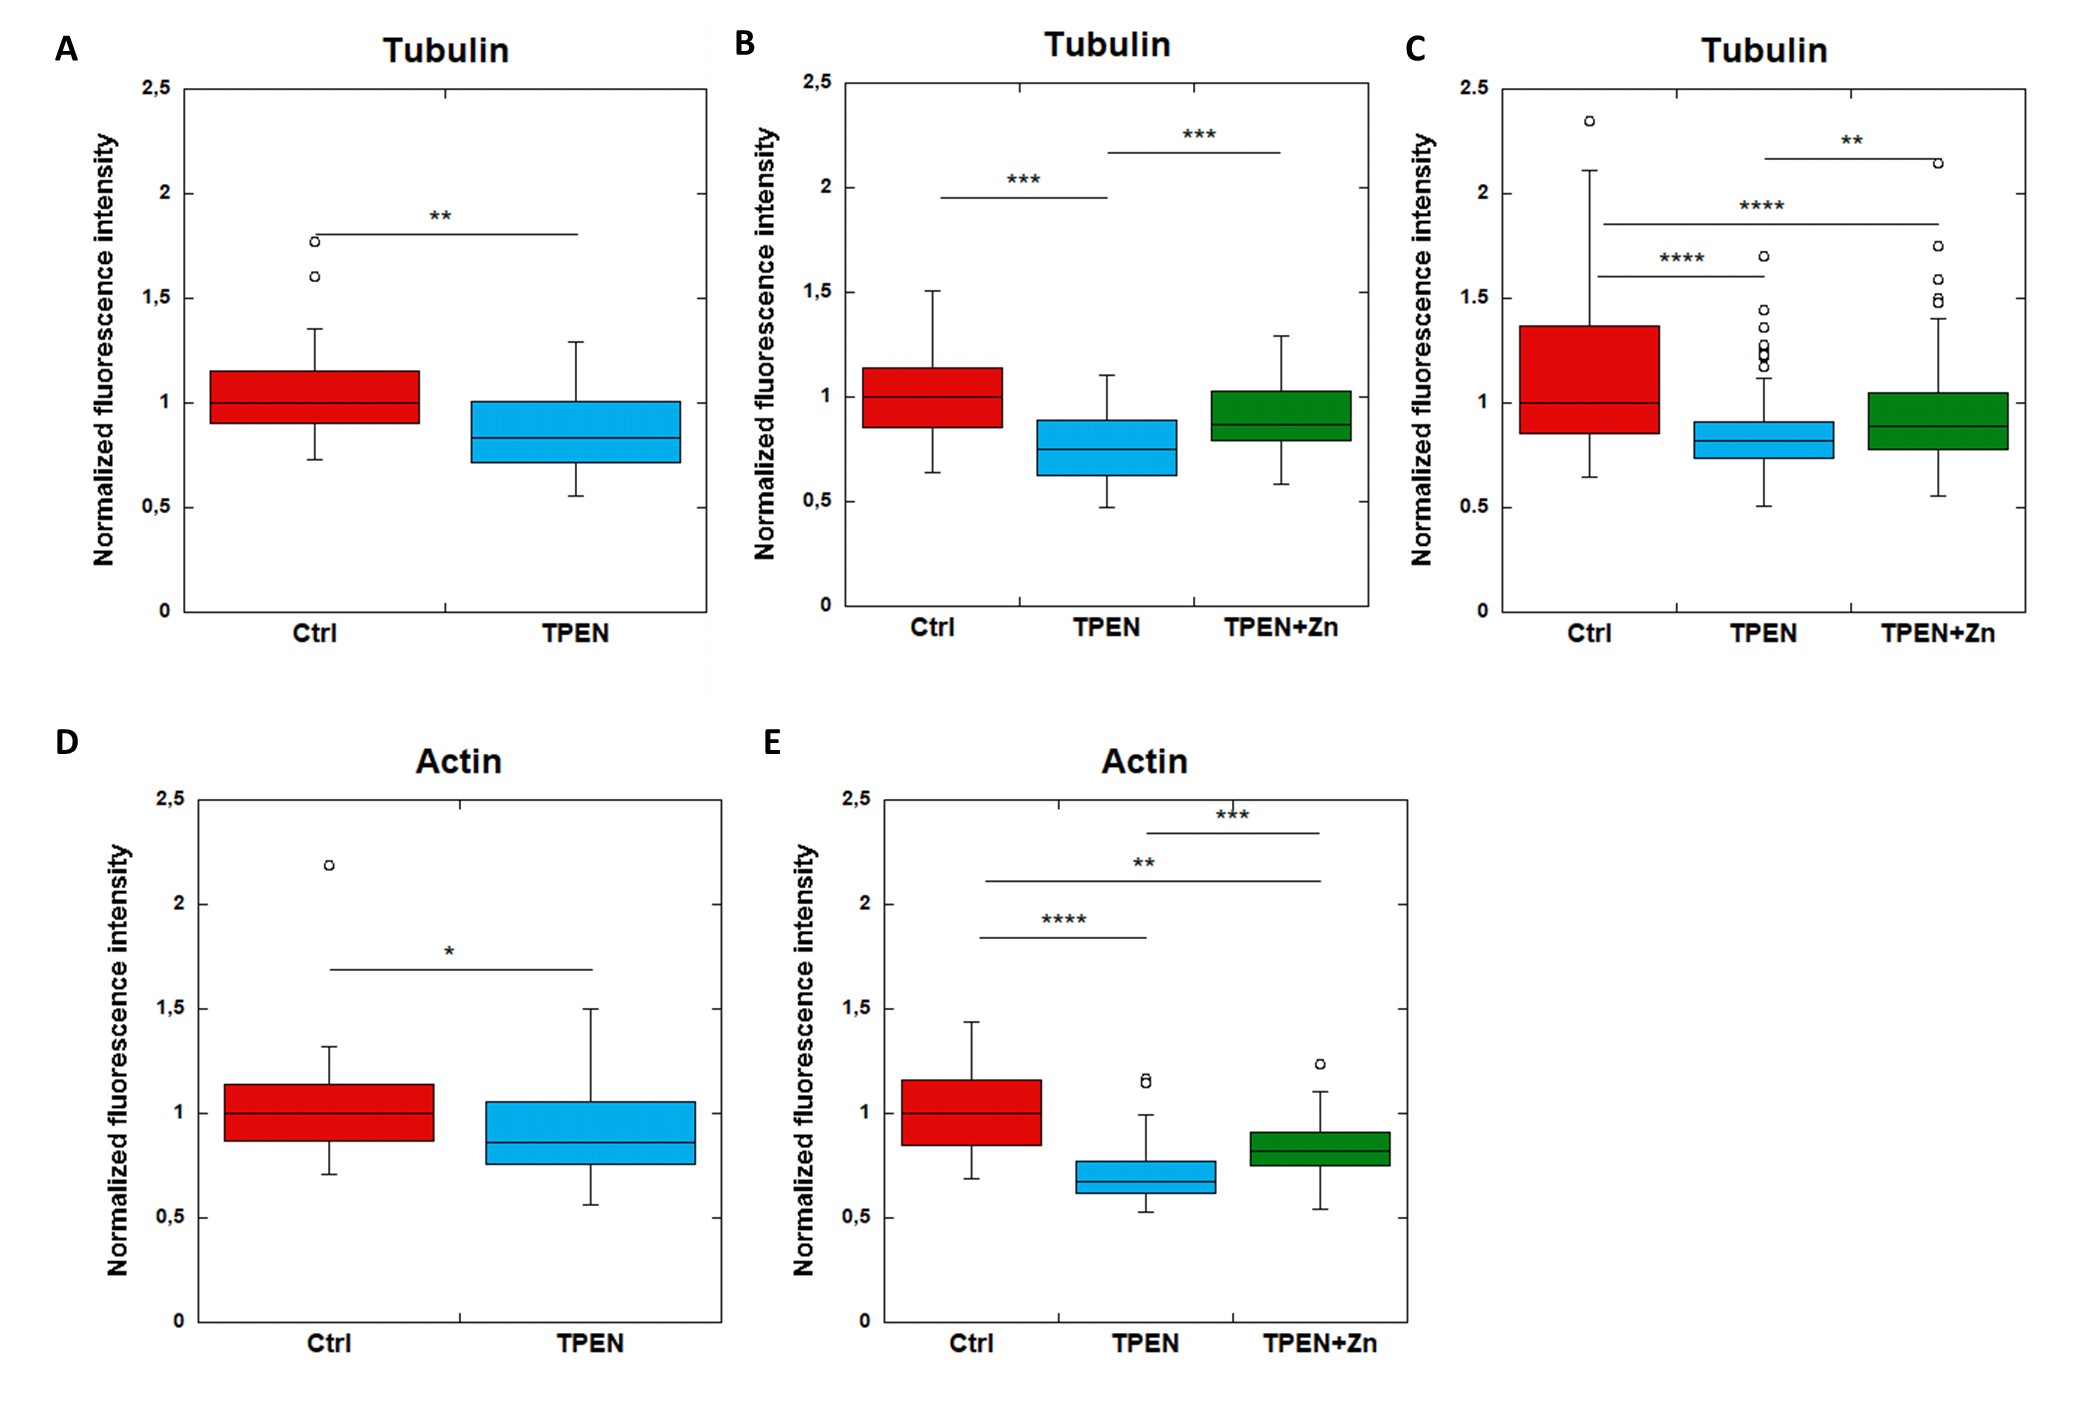

Supplement: supp [file elife-62334-supp-v1.zip › elife_poa_e62334_Figure_6_figure_supplement_1.jpg]
